# Supplementary material for: Effect of intraocular pressure reduction on progressive high myopia (PHM study): study protocol of a randomised controlled trial
Source: PubMed Central journal article supplement — BMJ Open. 2024 Jun 5;14(6):e084068. doi: 10.1136/bmjopen-2024-084068 (PMC11163624; doi:10.1136/bmjopen-2024-084068), 2024-06-05
Supplement: bmjopen-2024-084068.draft_revisions.pdf [file bmjopen-2024-084068.draft_revisions.pdf]

# BMJ Open

BMJ Open is committed to open peer review. As part of this commitment we make the peer review history of every article we publish publicly available.

When an article is published we post the peer reviewers' comments and the authors' responses online. We also post the versions of the paper that were used during peer review. These are the versions that the peer review comments apply to.

The versions of the paper that follow are the versions that were submitted during the peer review process. They are not the versions of record or the final published versions. They should not be cited or distributed as the published version of this manuscript.

BMJ Open is an open access journal and the full, final, typeset and author-corrected version of record of the manuscript is available on our site with no access controls, subscription charges or pay-per-view fees (<http://bmjopen.bmj.com>).

If you have any questions on BMJ Open's open peer review process please email [info.bmjopen@bmj.com](mailto:info.bmjopen@bmj.com)

# BMJ Open

## Effect of Intraocular Pressure Reduction on Progressive High Myopia (PHM study): Study Protocol of a Randomized Controlled Trial

|                               |                                                                                                                                                                                                                                                                                                                                                                                                                                                                                                                                                                                                                                                                                                                                                                                                                                                                                                                                                                                                                                                                                                                                                                                                                                                                                                                                                                                                                                                                                                                                                                                                                                                                                                                                                                                                                                                                                                                                       |
|-------------------------------|---------------------------------------------------------------------------------------------------------------------------------------------------------------------------------------------------------------------------------------------------------------------------------------------------------------------------------------------------------------------------------------------------------------------------------------------------------------------------------------------------------------------------------------------------------------------------------------------------------------------------------------------------------------------------------------------------------------------------------------------------------------------------------------------------------------------------------------------------------------------------------------------------------------------------------------------------------------------------------------------------------------------------------------------------------------------------------------------------------------------------------------------------------------------------------------------------------------------------------------------------------------------------------------------------------------------------------------------------------------------------------------------------------------------------------------------------------------------------------------------------------------------------------------------------------------------------------------------------------------------------------------------------------------------------------------------------------------------------------------------------------------------------------------------------------------------------------------------------------------------------------------------------------------------------------------|
| Journal:                      | <i>BMJ Open</i>                                                                                                                                                                                                                                                                                                                                                                                                                                                                                                                                                                                                                                                                                                                                                                                                                                                                                                                                                                                                                                                                                                                                                                                                                                                                                                                                                                                                                                                                                                                                                                                                                                                                                                                                                                                                                                                                                                                       |
| Manuscript ID                 | bmjopen-2024-084068                                                                                                                                                                                                                                                                                                                                                                                                                                                                                                                                                                                                                                                                                                                                                                                                                                                                                                                                                                                                                                                                                                                                                                                                                                                                                                                                                                                                                                                                                                                                                                                                                                                                                                                                                                                                                                                                                                                   |
| Article Type:                 | Protocol                                                                                                                                                                                                                                                                                                                                                                                                                                                                                                                                                                                                                                                                                                                                                                                                                                                                                                                                                                                                                                                                                                                                                                                                                                                                                                                                                                                                                                                                                                                                                                                                                                                                                                                                                                                                                                                                                                                              |
| Date Submitted by the Author: | 08-Jan-2024                                                                                                                                                                                                                                                                                                                                                                                                                                                                                                                                                                                                                                                                                                                                                                                                                                                                                                                                                                                                                                                                                                                                                                                                                                                                                                                                                                                                                                                                                                                                                                                                                                                                                                                                                                                                                                                                                                                           |
| Complete List of Authors:     | Gao, Xinbo; Sun Yat-Sen University Zhongshan Ophthalmic Center State Key Laboratory of Ophthalmology<br>Lam, Dennis SC; The Chinese University of Hong Kong<br>Chen, Shida; Sun Yat-Sen University Zhongshan Ophthalmic Center State Key Laboratory of Ophthalmology<br>Zhang, Xiulan; Sun Yat-Sen University Zhongshan Ophthalmic Center State Key Laboratory of Ophthalmology<br>Jiang, Jingwen; Sun Yat-Sen University Zhongshan Ophthalmic Center State Key Laboratory of Ophthalmology, Clinical research center<br>Lin, Tingting; Sun Yat-Sen University Zhongshan Ophthalmic Center State Key Laboratory of Ophthalmology, Clinical research center; Daqing Oilfield General Hospital<br>Lin, Fengbin; Sun Yat-Sen University Zhongshan Ophthalmic Center State Key Laboratory of Ophthalmology<br>Kong, Kangjie; Sun Yat-Sen University Zhongshan Ophthalmic Center State Key Laboratory of Ophthalmology, Clinical research center<br>Wang, Peiyuan; Sun Yat-Sen University Zhongshan Ophthalmic Center State Key Laboratory of Ophthalmology, Clinical research center<br>Chen, Jinmei; Sun Yat-Sen University Zhongshan Ophthalmic Center State Key Laboratory of Ophthalmology, Clinical research center<br>Song, Yunhe; Sun Yat-Sen University Zhongshan Ophthalmic Center State Key Laboratory of Ophthalmology<br>Wang, Zhenyu; Sun Yat-Sen University Zhongshan Ophthalmic Center State Key Laboratory of Ophthalmology<br>Jin, Ling; Sun Yat-Sen University Zhongshan Ophthalmic Center State Key Laboratory of Ophthalmology, Clinical research center<br>Liu, Yuhong; Sun Yat-Sen University Zhongshan Ophthalmic Center State Key Laboratory of Ophthalmology, Clinical research center<br>Chen, Meiling; Sun Yat-Sen University Zhongshan Ophthalmic Center State Key Laboratory of Ophthalmology<br>Jonas, Jost; Heidelberg University, Ophthalmology; Institute of Molecular and Clinical Ophthalmology Basel, |
| Keywords:                     | Randomized Controlled Trial, OPHTHALMOLOGY, Glaucoma < OPHTHALMOLOGY                                                                                                                                                                                                                                                                                                                                                                                                                                                                                                                                                                                                                                                                                                                                                                                                                                                                                                                                                                                                                                                                                                                                                                                                                                                                                                                                                                                                                                                                                                                                                                                                                                                                                                                                                                                                                                                                  |
|                               |                                                                                                                                                                                                                                                                                                                                                                                                                                                                                                                                                                                                                                                                                                                                                                                                                                                                                                                                                                                                                                                                                                                                                                                                                                                                                                                                                                                                                                                                                                                                                                                                                                                                                                                                                                                                                                                                                                                                       |

1  
2  
3  
4  
5  
6  
7  
8  
9  
10  
11  
12  
13  
14  
15  
16  
17  
18  
19  
20  
21  
22  
23  
24  
25  
26  
27  
28  
29  
30  
31  
32  
33  
34  
35  
36  
37  
38  
39  
40  
41  
42  
43  
44  
45  
46  
47  
48  
49  
50  
51  
52  
53  
54  
55  
56  
57  
58  
59  
60

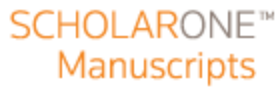

1  
2  
3  
4 1 **Effect of Intraocular Pressure Reduction on Progressive High**  
5  
6 2 **Myopia (PHM study): Study Protocol of a Randomized**  
7  
8 3 **Controlled Trial**  
9  
10 4

11  
12 5 Jingwen Jiang, MD<sup>1, \*</sup>, Tingting Lin, MD<sup>1, \*</sup>, Fengbin Lin, MD, PhD<sup>1</sup>, Kangjie  
13  
14 6 Kong, MD<sup>1</sup>, Peiyuan Wang, MD, PhD<sup>1</sup>, Yunhe Song, MD, PhD<sup>1</sup>, Zhenyu Wang,  
15  
16 7 MSc<sup>1</sup>, Ling Jin, MSc<sup>1</sup>, Yuhong Liu, MSc<sup>1</sup>, Xinbo Gao, MD, PhD<sup>1</sup>, Jinmei Chen,  
17  
18 8 MBBS<sup>1</sup>, Meiling Chen, MBBS<sup>1</sup>, Dennis SC Lam, MD<sup>2</sup>, Jost B. Jonas, MD<sup>3,4</sup>,  
19  
20 9 Shida Chen, MD, PhD<sup>1, †</sup>, Xiulan Zhang, MD, PhD<sup>1, †</sup>, for the Glaucoma Suspects  
21  
22 10 with High Myopia Study Group  
23  
24 11

25  
26 12 <sup>1</sup>State Key Laboratory of Ophthalmology, Zhongshan Ophthalmic Center, Sun  
27  
28 13 Yat-sen University, Guangdong Provincial Key Laboratory of Ophthalmology and  
29  
30 14 Visual Science, Guangdong Provincial Clinical Research Center for Ocular  
31  
32 15 Diseases, Guangzhou 510623, China.

33  
34 16 <sup>2</sup> The International Eye Research Institute, the Chinese University of Hong Kong  
35  
36 17 (Shenzhen), Shenzhen, China.

37  
38 18 <sup>3</sup>Department of Ophthalmology, Medical Faculty Mannheim, Heidelberg  
39  
40 19 University, Mannheim, Germany.

41  
42 20 <sup>4</sup>Institute of Molecular and Clinical Ophthalmology, Basel, Switzerland.  
43  
44 21

45  
46 22 \* Jingwen Jiang and Tingting Lin contributed equally.

47  
48 23 Tingting Lin is a visiting doctor at Zhongshan Ophthalmic Center.  
49  
50 24

51  
52 25 **†Corresponding Author**

53  
54 26 Xiulan Zhang, MD, PhD

55  
56 27 State Key Laboratory of Ophthalmology, Zhongshan Ophthalmic Center, Sun Yat-  
57  
58 28 Sen University, No.7 Jinsui Road, Guangzhou 510060, China.

59  
60 29 Phone number:+86 135 7016 6308

1  
2  
3 30 Email: zhangxl2@mail.sysu.edu.cn  
4  
5

6 31

7 32 Shida Chen, MD, PhD

8  
9 33 State Key Laboratory of Ophthalmology, Zhongshan Ophthalmic Center, Sun Yat-

10  
11 34 Sen University, No.7 Jinsui Road, Guangzhou 510060, China.

12  
13 35 Email: chenshd3@mail.sysu.edu.cn  
14

15 36

16  
17 37 **Competing Interest Statement and Financial Disclosure:**

18  
19 38 Jost B. Jonas: European patent EP 3,271,392, JP 2021-119187, and US 2021

20  
21 39 0340237 A1: Agents for use in the therapeutic or prophylactic treatment of myopia

22  
23 40 or hyperopia; European patent application 23196899.1 “EGFR Antagonists for the

24  
25 41 treatment of diseases involving unwanted migration, proliferation, and metaplasia

26  
27 42 of retinal pigment epithelium (RPE) cells”.  
28

29 43

30  
31 44 **Ethics Statement:** The study was approved by the ethical committee of the

32  
33 45 Zhongshan Ophthalmic Center and adhered to the tenets of the Declaration of

34  
35 46 Helsinki. Written informed consent was obtained from all subjects.  
36

37 47

38  
39 48 **Key Words:** High myopia, Axial length, Intraocular pressure, Randomized

40  
41 49 controlled trial  
42

43 50

44  
45 51

46  
47 52

48  
49 53

50  
51 54

52  
53 55

54  
55 56

56  
57 57

58  
59 58  
60

1  
2  
3  
4 59 **ABSTRACT**

5  
6 60 **Background** In adult patients with high myopia (HM), progressive axial elongation  
7  
8 61 poses a significant risk for the development of subsequent ocular's complications that  
9  
10 62 may lead to visual impairment. Effective strategies to reduce or prevent further axial  
11  
12 63 elongation in highly myopic adult patients have not been available so far. Recent studies  
13  
14 64 suggested that medically lowering intraocular pressure (IOP) may reduce axial  
15  
16 65 elongation. This clinical randomized controlled trial (RCT) aims to evaluate the  
17  
18 66 efficacy of medical IOP reduction in adult patients with progressive HM (PHM).

19  
20 67 **Methods and analysis** This single-center, open-label, prospective RCT will recruit 152  
21  
22 68 participants with PHM at the Zhongshan Ophthalmic Center (ZOC). Randomized in a  
23  
24 69 ratio of 1:1, participants will receive IOP-lowering eyedrops (intervention group) or  
25  
26 70 will be followed without treatment (control group) for 12 months. Follow-up visits will  
27  
28 71 be conducted at 1, 6, and 12 months after baseline. Only one eye per participant will be  
29  
30 72 eligible. The primary outcome is the change in axial length (AL) within the study period  
31  
32 73 of 12 months. Secondary outcomes include the incidence and progression of visual field  
33  
34 74 (VF) defects, changes in optic disc morphology and incidence and progression of  
35  
36 75 myopic maculopathy. Difference in AL changes between the two groups will be  
37  
38 76 analyzed using linear regression analysis. For the secondary outcomes, a multifactor  
39  
40 77 Poisson regression within a generalized linear model will be utilized to estimate the  
41  
42 78 relative risk of progression in VF defects and myopic maculopathy, and the rate of  
43  
44 79 thinning in retinal nerve fiber layer and ganglion cell-inner plexiform will be assessed  
45  
46 80 through Kaplan-Meier curves and log-rank tests.

47  
48 81 **Ethics and dissemination** Full ethics approval for this trial has been obtained from the  
49  
50 82 Ethics Committee of ZOC, Sun Yat-sen University, China (ID: 2023KYPJ110). Results  
51  
52 83 of this trial will be disseminated through peer-reviewed journals and conference  
53  
54 84 presentations.

55  
56 85 **Trial registration number** NCT05850936 *clinicaltrials.gov*

57  
58 86  
59  
60

1  
2  
3  
4 87 **Strengths and limitations of this study**

5 88 1. The primary objective of this study is to address a global healthcare concern:

6  
7 89 effectively mitigating further axial elongation in highly myopic adult patients.

8  
9 90 2. Due to practical constraints, a double-masking in the study design cannot be

10  
11 91 achieved.

12  
13 92

14  
15 93

16  
17 94

18  
19 95

20  
21 96

22  
23 97

24  
25 98

26  
27 99

28  
29 100

30  
31 101

32  
33 102

34  
35 103

36  
37 104

38  
39 105

40  
41 106

42  
43 107

44  
45 108

46  
47 109

48  
49 110

50  
51 111

52  
53 112

54  
55 113

56  
57 114

58  
59 114

60

For peer review only

## 115 **Introduction**

116 High myopia (HM) is an important global public health issue <sup>1-2</sup>, with prevalence  
117 estimates of approximately 163 million individuals (2.7% of the world population)  
118 affected in 2000, and of approximately 938 million (9.8% of the world population)  
119 people estimated to be affected in 2050 <sup>3-5</sup>. High myopia-related complications, such as  
120 optic neuropathy, myopic maculopathy and retinal detachment, can lead to irreversible  
121 visual impairment <sup>6-8</sup>.

122 Recent clinical studies have revealed that highly myopic eyes in adult patients can  
123 undergo further axial elongation with a rate up 0.1mm/year <sup>9</sup>. Axial elongation in highly  
124 myopic eyes is a major risk for progression of myopic macular degeneration and  
125 potentially of high myopia-associated optic neuropathy and subsequent vision  
126 impairment <sup>10-11</sup>. Effective strategies to reduce or stop further axial elongation in highly  
127 myopic eyes are warranted.

128 Recent experimental studies have suggested that medical reduction of intraocular  
129 pressure (IOP) could be protective against axial elongation in guinea pigs <sup>12-13</sup>. In a  
130 clinical observational study, application of IOP-lowering medication, but not the IOP-  
131 value itself, was associated with a reduced ongoing axial elongation in highly myopic  
132 patients <sup>14</sup>. As a corollary, recent Mendelian research has established a bidirectional  
133 association at the genetic level between myopia and primary open-angle glaucoma  
134 mediated through IOP <sup>15</sup>. In a recent retrospective clinical study medically IOP-  
135 lowering reduced axial elongation in highly myopic eyes (own unpublished data).

136 Building upon these findings, we hypothesize that medically IOP-lowering may  
137 slow axial elongation by potentially three pathways related to the sclera and choroid<sup>16</sup>.  
138 We therefore aim to conduct a randomized controlled trial (RCT) to assess the efficacy  
139 of medical IOP-lowering in managing axial elongation in patients with progressive HM  
140 (PHM). Additionally, this study should generate data on the effects of IOP-lowering  
141 treatment on the incidence and changes in the visual field (VF), changes in the optic  
142 nerve head morphology and myopic maculopathy. The outcomes of the study may



1  
2  
3  
4 143 establish a basis for treatment recommendations for preventing axial elongation of  
5  
6 144 highly myopic eyes.

7  
8 145

9  
10 146

## 11 147 **Methods and Analysis**

### 12 148 **Study design**

13  
14  
15  
16 149 The PHM study is an open-label, single-center RCT. The study will be conducted at  
17  
18 150 the Zhongshan Ophthalmic Center (ZOC), Sun Yat-Sen University, a tertiary  
19  
20 151 specialized hospital in Guangzhou, China. All examinations and interventions will be  
21  
22 152 carried out in the Clinical Research Center at ZOC. **Figure 1** summarizes the design of  
23  
24 153 the PHM study.

25  
26 154

### 27 155 **Objective**

28  
29  
30 156 The primary aim of this trial is to evaluate the effectiveness of medically IOP-lowering  
31  
32 157 therapy, targeting a 10% decrease from baseline levels, in managing axial elongation  
33  
34 158 in patients with PHM over a 12-month observation period. Additionally, the trial will  
35  
36 159 assess alterations in VF, optic disc morphology, thickness of the retinal nerve fiber layer  
37  
38 160 (RNFL) and retinal ganglion cell-inner plexiform layer (GC-IPL), and the occurrence  
39  
40 161 or advancement of myopic maculopathy.

41  
42 162

### 43 163 **Recruitment**

#### 44 164 *Inclusion criteria*

- 45  
46  
47  
48 165 1. Age  $\geq 18$  years and  $\leq 65$  years.  
49  
50 166 2. Diagnosed with HM<sup>17-18</sup>: spherical equivalent  $\leq -6.00$  diopters or AL  $\geq 26.5$  mm.  
51  
52 167 3. Diagnosed with PHM: axial elongation  $\geq 0.05$ mm in the past 6 months or  $\geq 0.1$ mm  
53  
54 168 in the past 12 months.  
55  
56  
57  
58  
59  
60

1  
2  
3  
4 169 4. IOP:  $\geq 10$  mmHg and  $\leq 21$ mmHg on at least 2 visits using Goldmann applanation  
5  
6 170 tonometry with correction for the dependence of the IOP-reading on corneal thickness  
7  
8 171 <sup>19</sup>.

9  
10 172 5. Best corrected visual acuity (BCVA)  $\geq 6/12$ , ability to undergo AL measurement,  
11  
12 173 fundus photography, optical coherence tomography (OCT), and complete VF  
13  
14 174 examination.

15  
16 175

17  
18 176 *Exclusion criteria*

19  
20 177 1. Allergy to any kind of IOP-lowering eyedrops.

21  
22 178 2. Presence of serious fundus pathologies like proliferative diabetic retinopathy, retinal  
23  
24 179 detachment, central retinal artery occlusion, etc.

25  
26 180 3. Presence of chronic, recurrent, or severe ocular inflammatory lesions such as chronic  
27  
28 181 or recurrent uveitis.

29  
30 182 4. Significant corneal or iris lesions, severe cataract affecting fundus examination, or  
31  
32 183 patients with only one eye.

33  
34 184 5. Intraocular surgery or laser treatment within the last year, such as cataract surgery.

35  
36 185 6. With a history of previous refractive surgery or prior treatment for myopia-related  
37  
38 186 conditions (e.g., orthokeratology lens wear, low-intensity red light therapy, or low-  
39  
40 187 concentration atropine treatment).

41  
42 188 7. Presence of other serious systemic diseases (e.g., hypertension, heart disease,  
43  
44 189 diabetes, rheumatic immune system disease) that hinder long-term follow-up and eye  
45  
46 190 treatment.

47  
48 191 8. Pregnancy, lactation, or plans to have children during the follow-up period.

49  
50 192

51  
52 193 In this study, only one eye per participant will be eligible for inclusion. If both eyes  
53  
54 194 meet the inclusion criteria, the eye with a higher rate of axial elongation, a worse mean  
55  
56 195 perimetric deviation (MD) value, and a worse BCVA will be selected.

57  
58 196  
59  
60

## 197 **Randomization and blinding**

198 In this trial, randomization will be employed to mitigate distribution bias. After  
199 confirming all inclusion and exclusion criteria and obtaining signed written informed  
200 consent forms, qualified individuals within each block, with a block size of 4, will be  
201 assigned in an even (1:1) manner to either the intervention group or the control group.  
202 The random sequence will be generated using an electronic data collection (EDC)  
203 system to ensure unbiased allocation.

204 In this trial, the participants and physicians will not be blinded to the intervention  
205 assignment. The technicians conducting the examinations and interpreting the images  
206 will be unaware of the participants' group assignments during the screening and follow-  
207 up stages. The researchers analyzing the data will also be unaware of the information  
208 regarding randomization.

## 210 **Interventions**

### 211 *Wash out*

212 Patients who have been using IOP-lowering medications prior to enrollment need to  
213 undergo a drug washout period. Different medications have different washout periods:  
214 prostaglandin analogs require a washout period of 4 weeks, beta-blockers require 3  
215 weeks, adrenergic receptor agonists require 2 weeks, cholinergic receptor agonists and  
216 carbonic anhydrase inhibitors require 5 days. For patients who have previously  
217 discontinued medication and have already satisfied the specific washout period for that  
218 medication, or for those who have not received any IOP-lowering medication, a blank  
219 washout period is not necessary.

### 221 *Intervention group*

222 Participants assigned to the intervention group will receive medical IOP-lowering  
223 therapy for a duration of 12 months or until they reach the endpoint. Only the study  
224 eye will receive medication in the enrolled participants. The preferred initial

1  
2  
3  
4 225 medication for reducing IOP is Xalacom<sup>®</sup> eye drops (a fixed latanoprost and timolol  
5  
6 226 combination). If the target IOP (reducing baseline IOP by 10%) is not achieved after  
7  
8 227 one month of treatment, 1% brinzolamide eye drops (Azopt<sup>®</sup>) will be added. If the  
9  
10 228 target IOP is still not achieved after an additional month of treatment, brimonidine  
11  
12 229 tartrate eye drops (Alphagan<sup>®</sup> 0.2% or Alphagan-P<sup>®</sup> 0.15%) will be added. If the  
13  
14 230 patient is allergic to prostaglandin analogs, the preferred alternative is Azarga<sup>®</sup> eye  
15  
16 231 drops (a fixed brinzolamide with timolol combination). If the target IOP is not  
17  
18 232 achieved after one month of treatment, brimonidine tartrate eye drops (Alphagan<sup>®</sup>  
19  
20 233 0.2% or Alphagan-P<sup>®</sup> 0.15%) will be added (**Figure 2**).

21  
22 234 The treatment protocol will involve the instillation of a single drop of  
23  
24 235 prostaglandin ophthalmic solution in the study eye once daily in the evening for  
25  
26 236 medications such as Xalacom. For medications like timolol, Alphagan (or Alphagan-  
27  
28 237 P), brinzolamide, or Azarga, the study eye will receive one drop twice daily. To  
29  
30 238 ensure the standardization of medication usage among participants, subjects will be  
31  
32 239 provided with medication logbooks, which will be collected and recorded by the  
33  
34 240 investigators during the study visits.

35  
36 241 Regular assessment of IOP will be conducted on a weekly basis following the  
37  
38 242 initiation or addition of medication until the target value is achieved in the study eye.  
39  
40 243 If the study eye fails to reach the target IOP even after escalating the medication, the  
41  
42 244 medication will be discontinued, but the subsequent follow-up visits will continue as  
43  
44 245 planned.

#### 45 46 246 47 48 247 *Control group*

49  
50 248 Participants assigned to the control group will be followed up for 12 months or until  
51  
52 249 they reach the endpoint without medical IOP-lowering therapy.

#### 53 54 250 55 56 251 **Outcome measures**

57  
58 252 *Primary outcome*  
59  
60

1  
2  
3  
4 253 The primary outcome is the change of AL at 12-month from baseline measured by  
5  
6 254 IOLMaster.

7  
8 255

9  
10 256 *Secondary outcomes*

11 257 1. Incidence and progression of VF defects at 12 months from baseline based on

12  
13 258 Humphrey 24-2 standard VF. Under the premise of reliable VF examination,

14  
15 259 compared to the baseline, two consecutive perimetric examinations reveal the

16  
17 260 incidence of VF defects or significant perimetric progression in at least three points at

18  
19 261 a significance level of  $p < 0.05$ . Furthermore, two subsequent diagnostic VF

20  
21 262 examinations conducted within one month also confirm the progression at the

22  
23 263 locations. The time of progression is defined as the time of the initial diagnostic VF

24  
25 264 examination<sup>20-21</sup>.

26  
27 265 2. Changes in optic disc morphology (including thinning of RNFL and GC-IPL) at

28  
29 266 12-month from baseline based on fundus photography and OCT<sup>22-24</sup>.

30  
31 267 3. Incidence and progression of myopic maculopathy at 12 months from baseline based

32  
33 268 on fundus photography and OCT. The determination of incidence and progression of

34  
35 269 myopic maculopathy is based on the META-PM classification system<sup>25-26</sup>.

36  
37 270

38  
39 271 **Study assessments**

40  
41 272 *Visual acuity*

42  
43 273 Visual acuity assessment will be conducted prior to any procedures that may potentially

44  
45 274 impact vision, such as pupil dilation or VF examination. The measurement of visual

46  
47 275 acuity will be performed using an ETDRS (Early Treatment of Diabetic Retinopathy

48  
49 276 Study) LogMAR chart (Precision Vision, Villa Park, Illinois, USA) under standard

50  
51 277 illumination conditions at 4 meters<sup>27</sup>. For BCVA, a trial frame will be positioned and

52  
53 278 adjusted on the participant's face based on auto refractometric readings and subsequent

54  
55 279 subjective refinement.

56  
57 280  
58  
59  
60

1  
2  
3  
4 281 *Refractometry*

5 282 Following pupil dilation using 0.25% compound tropicamide (Zhuobian®; Sinqi,  
6  
7 283 China), three measurements will be taken for each eye using an auto refractometer  
8  
9 284 (KR800, TOPCON, Tokyo, Japan). The average values for spherical refractive error,  
10  
11 285 cylindrical refractive error, and astigmatic axis will be recorded for further analysis and  
12  
13 286 documentation.  
14

15  
16 287

17  
18 288 *Slit-lamp biomicroscopy*

19  
20 289 The evaluation of the anterior segment with the pupil undilated will be performed using  
21  
22 290 a slit lamp (BQ-900, Haag Streit, Koeniz, Switzerland). After medical pupillary dilation,  
23  
24 291 a slit lamp-based grading of lens opacities is conducted, and using a 90D indirect  
25  
26 292 ophthalmoscopic lens (Ocular 90D Slit Lamp Lenses, Ocular, Washington, DC, USA),  
27  
28 293 the optic disc, macula, and peripheral retina will be examined.  
29

30 294

31  
32 295 *Tonometry*

33  
34 296 IOP measurements will be performed by Goldmann applanation tonometry (AT900,  
35  
36 297 Haag Streit, Koeniz, Switzerland). Prior to enrollment, all participants will undergo  
37  
38 298 three baseline IOP readings during specific time intervals: 9 am to 10 am, 1 pm to 2  
39  
40 299 pm, and 4 pm to 5 pm. During follow-up visits, tonometry will be conducted between  
41  
42 300 9 am and 11 am or between 2 pm and 4 pm. Results from three consecutive  
43  
44 301 measurements will be documented during each visit, and the mean value of these  
45  
46 302 measurements will be utilized for assessment purposes.  
47

48 303

49  
50 304 *AL measurement*

51  
52 305 AL measurement will be performed using the IOLMaster (IOLmaster 700, Carl Zeiss  
53  
54 306 Meditec, Jena, Germany). Results from five consecutive measurements will be  
55  
56 307 documented during each visit, and the mean value of these measurements will be  
57  
58 308 utilized for further analysis.  
59  
60

1  
2  
3  
4 309

5 310 *Central corneal thickness (CCT) measurement*

7 311 CCT measurement will be performed with IOLMaster (IOLmaster 700, Carl Zeiss  
9 312 Meditec, Jena, Germany). Results from five consecutive measurements will be  
11 313 documented during each visit, and the mean value of these measurements will be taken  
13 314 for further analysis.

15 315

17 316 *Perimetry*

19 317 The perimetric examination will be performed applying the Humphrey Field Analyzer  
21 318 Mark 3 (Carl Zeiss Meditec, Dublin, CA, USA) and the Swedish Interactive Threshold  
23 319 Algorithm Standard (SITA) 24-2 program. A reliable VF report is defined as having  
25 320 false-positive and false-negative errors below 15%, as well as fixation losses below  
27 321 20%.

29 322

31 323 *Fundus photography*

33 324 Using fundus cameras (KOWA, Nonmyd, WX3D, Nagoya, Japan; TRC-NW400,  
35 325 TOPCON, Tokyo, Japan), two fundus images centered on the optic disc will be taken  
37 326 for each eye under both standardized stereoscopic and non-standardized conditions.  
39 327 Additionally, a single image focused on the macula will be obtained after pupil dilation.

41 328

43 329 *OCT examination*

45 330 All participants will undergo a series of standardized swept-source OCT examinations  
47 331 using the DRI-OCT Triton model (TOPCON, Tokyo, Japan), focusing on the optic disc  
49 332 and macula. To ensure the reliability and accuracy of the results, a minimum image  
51 333 quality score of 60 will be set. In addition to the swept-source OCT, a spectral domain  
53 334 OCT examination will be conducted to obtain measurements of the peripapillary RNFL  
55 335 and the macular GC-IPL.

57 336  
59  
60

1  
2  
3  
4 337 *Pregnancy test*

5 338 A urine pregnancy test will be performed for women of reproductive age during their  
6  
7 339 initial visit.  
8  
9

10 340

11 341 *Anthropometry and blood pressure*

12 342 Participants' height and weight measurements will be measured using a free-standing  
13  
14 343 height rod and a calibrated scale (RGZ120, Jiangsu Wujin Weighing Apparatus Factory,  
15  
16 344 Jiangsu, China). During the baseline visit, blood pressure readings will be obtained  
17  
18 345 from the participant's left arm while they are seated and have rested for a minimum of  
19  
20 346 five minutes with the Omron M7 Blood Pressure Monitor (Matsusaka, Mie, Japan).  
21  
22  
23

24 347

25  
26 348 **Visit schedule**

27  
28 349 **Table 1** summarizes the visit schedule for the enrolment, interventions, and  
29  
30 350 assessments of this trial.  
31

32 351

33  
34 352 **Sample size**

35  
36 353 The sample size calculation for this study was determined based on the primary  
37  
38 354 outcome and the study hypothesis, taking into account relevant findings from previous  
39  
40 355 studies. The objective of this study is to evaluate the potential of IOP-lowering therapy  
41  
42 356 to reduce axial elongation during a study period of one year growth in eyes with PHM.  
43  
44 357 It is hypothesized that the intervention group receiving IOP-lowering therapy will  
45  
46 358 exhibit a 70% reduction in axial elongation compared to the control group. The control  
47  
48 359 group is estimated to experience a 0.1 mm axial elongation over 12 months, while the  
49  
50 360 intervention group is expected to have a mean axial elongation of 0.03 mm. The  
51  
52 361 common standard deviation is estimated to be 0.14 mm. To achieve a statistical power  
53  
54 362 of 80% with a two-sided significance level of 0.05, a total of 64 individuals per group  
55  
56 363 is required. Accounting for an estimated 15% loss to follow-up at the 12-months mark,  
57  
58 364 the final sample size is determined to be 76 individuals per group, resulting in a total  
59  
60



1  
2  
3  
4 365 of 152 participants. The sample size calculation was performed using PASS 16.0  
5  
6 366 software (NCSS, LLC, Kaysville, UT, USA).

7  
8 367

9  
10 368 **Statistical analysis**

11  
12 369 Statistical analysis will be conducted using Stata 16.0 software (StataCorp, College  
13  
14 370 Station, TX, USA). A two-sided P-value of less than 0.05 will be considered  
15  
16 371 statistically significant, and a 95% confidence interval will be used for parameter  
17  
18 372 estimation.

19  
20 373 For the intention-to-treat (ITT) analysis, missing data will be addressed using the  
21  
22 374 multiple imputation method. No simulation will be performed for missing data in the  
23  
24 375 safety evaluation. Dropout rates in the two groups will be compared using chi-squared  
25  
26 376 tests or Fisher's exact tests. Descriptive statistics will be reported as mean and standard  
27  
28 377 deviation for normally distributed continuous data, and as median and interquartile  
29  
30 378 range for non-normally distributed continuous data. Frequency and percentage will be  
31  
32 379 provided for categorical data. Baseline data, including demographic and clinical  
33  
34 380 characteristics, will be analyzed using independent samples t-tests and Wilcoxon rank-  
35  
36 381 sum tests for continuous data, and chi-squared or Fisher's exact tests for categorical  
37  
38 382 variables.

39  
40 383 The analysis of primary and secondary outcomes will follow the ITT principle,  
41  
42 384 including all participants. For the primary outcome, the difference in axial elongation  
43  
44 385 between the two groups will be analyzed using linear regression analysis. As for the  
45  
46 386 secondary outcomes, a multifactor Poisson regression within a generalized linear model  
47  
48 387 will be utilized to estimate the relative risk of progression in perimetric defects and  
49  
50 388 myopic maculopathy. Additionally, the rate of thinning of the RNFL and the GC-IPL  
51  
52 389 will be assessed through log-rank tests.

53  
54 390 Safety analysis will be performed in participants belonging to the intervention  
55  
56 391 group, comparing adverse event occurrence between the two groups using the chi-  
57  
58 392 squared test or Fisher's exact test.

1  
2  
3  
4 393 The missing data will be handled using the Multiple Imputations method. With the  
5  
6 394 multiple imputation approach, 20 replicas of the dataset will be generated, where  
7  
8 395 missing values are imputed through chained equations. The final results will be  
9  
10 396 obtained by averaging these 20 datasets using Rubin's rules.

11  
12 397

### 13 14 398 **Data monitoring**

15  
16 399 (1) The Data Monitoring Committee (DMC) will closely monitor the data throughout  
17  
18 400 the trial using the EDC system to ensure the reliability and integrity of the collected  
19  
20 401 data. The DMC members are independent individuals who are not affiliated with the  
21  
22 402 researchers or sponsors, ensuring an impartial assessment. There is no conflict of  
23  
24 403 interest between the researchers and sponsors, further guaranteeing the transparency  
25  
26 404 and objectivity of the data monitoring process.

27  
28 405 (2) Interim analysis: The study does not include provisions for conducting an interim  
29  
30 406 analysis.

31  
32 407

### 33 34 408 **Data management**

35  
36 409 The collected data will be meticulously recorded and entered into the EDC system. The  
37  
38 410 EDC system is securely hosted on a password-protected network server, ensuring  
39  
40 411 digital protection. Only the principal investigators and authorized study team members  
41  
42 412 will have access to the research data. To ensure confidentiality and integrity, all source  
43  
44 413 documents will be stored in locked file cabinets with restricted access. Prior to data  
45  
46 414 collection, all researchers will undergo comprehensive training. The raw data will be  
47  
48 415 monitored by an independent data and safety monitoring committee. In the event of  
49  
50 416 queries or uncertainties in the case report form, the data administrator will generate a  
51  
52 417 data queue request (DRQ) and communicate the query to the researcher through the  
53  
54 418 clinical monitoring system. The researcher is expected to provide a prompt response to  
55  
56 419 the data administrator. If necessary, data modifications, confirmations, and entries will  
57  
58 420 be made, and a new DRQ will be issued.

1  
2  
3  
4 421

5 422 **Drug packaging, management, dispensing and storage**

7 423 *Drug packaging*

10 424 The investigational drugs will be packaged in their own containers with dedicated  
11 425 research labels. Each medication package will consist of a single box, and each box will  
12 426 contain one unit of the drug. The box packaging will be made of paper and labeled with  
13 427 the phrase "For Clinical Research Use Only," along with a drug label indicating a  
14 428 unique drug identification number. The drug identification number is composed of the  
15 429 first two letters of the drug name followed by a four-digit Arabic numeral.

21 430

23 431 *Drug management*

26 432 The investigator will directly purchase the investigational drugs through the ZOC  
27 433 Research Procurement System. The drugs will be received and stored by a dedicated  
28 434 medication administrator in the Clinical Research Center. The investigational drugs  
29 435 will be managed by the designated medication administrator, who will be responsible  
30 436 for:

- 36 437 1. Storing the drugs according to the storage conditions specified in the drug  
37 438 instructions.
- 40 439 2. Recording all drug dispensing and retrieval activities.
- 42 440 3. Dispensing the drugs only to the participants as specified in the research protocol.
- 44 441 4. Maintaining a comprehensive record of drug inventory throughout the study and  
45 442 providing inventory logs.
- 48 443 5. Maintaining a detailed catalog of the drugs, including information on received  
49 444 materials, dispensing dates, and records of drugs provided to participants.
- 52 445 6. Ensuring that the drug dispensing records match the usage and unused drugs and  
53 446 providing explanations for any discrepancies. Relevant dispensing and return forms  
54 447 must be signed by the medication administrator.

58 448  
59  
60

1  
2  
3  
4 449 *Drug dispensing*

5 450 After randomization, the medication administrator will dispense the corresponding  
6  
7 451 investigational drugs to the participants based on the randomized assignment and  
8  
9 452 document the drug dispensing.  
10

11 453

12  
13  
14 454 *Drug storage*

15 455 Unopened medications should be stored according to the instructions provided in the  
16  
17 456 drug package insert. For drugs that require refrigeration between 2-8°C, the medication  
18  
19 457 administrator needs to monitor the temperature and humidity daily and document the  
20  
21 458 storage conditions. The research drugs should not be provided to anyone other than the  
22  
23 459 participants in the study. Access to the research drugs is limited to personnel authorized  
24  
25 460 by the principal investigator to dispense them. After opening, medications should be  
26  
27 461 stored according to the instructions provided in the drug package insert and must be  
28  
29 462 used within four weeks of opening the drug package.  
30

31 463

32  
33  
34 464 **Safety assessments**

35  
36 465 The safety assessments included in this study are as follows:

37  
38 466 1. Medication-related safety assessment: The ocular hypotensive medications used in  
39  
40 467 this study are known to have rare occurrences of local and systemic adverse reactions,  
41  
42 468 such as ocular surface irritation, eyelid pigmentation, eyelash growth, and drug  
43  
44 469 allergies. These assessments will be conducted and recorded by the investigators  
45  
46 470 during the study visits using slit lamp examination.

47  
48 471 2. High myopia-related safety assessment: This study focuses on individuals with high  
49  
50 472 myopia, and during the natural course of high myopia, retinal pathologies can occur.  
51  
52 473 The investigators will assess and record the complications associated with high myopia  
53  
54 474 based on the examination results during the study visits.  
55

56 475

57  
58 476 **Report and management of adverse events**  
59  
60

1  
2  
3  
4 477 An adverse event refers to any negative medical occurrence experienced by a  
5  
6 478 participant in the study, regardless of its relation to the treatment. Utmost attention will  
7  
8 479 be given to identifying potential adverse events or unfavorable findings. The primary  
9  
10 480 concern is the safety of the participant, and appropriate medical intervention will be  
11  
12 481 provided in case of an adverse event. All adverse events, whether reported voluntarily  
13  
14 482 by the participant or discovered through questioning, physical examination, or other  
15  
16 483 means by the study staff, will be promptly recorded on an online adverse event form  
17  
18 484 The Safety Supervision Committee will review each form to determine the appropriate  
19  
20 485 coding and reporting procedures.

21  
22 486 Serious adverse events, regardless of their connection to the study drug, must be  
23  
24 487 reported within 24 hours to the Institutional Review Board (IRB), the DMC, and the  
25  
26 488 Clinical Research Center. Additionally, a faxed report must be sent to the Drug  
27  
28 489 Administration's drug registration office. The original and fax confirmation forms for  
29  
30 490 serious adverse events should be retained in the research center along with the case  
31  
32 491 report form.

33  
34 492

### 35 36 493 **Discussion**

37  
38 494 This trial is designed to evaluate the effect of intraocular pressure reduction on  
39  
40 495 progressive high myopia. Due to the limited research on the use of IOP reduction  
41  
42 496 medications in highly myopic eyes, the study design was conducted on the preliminary  
43  
44 497 experimental results. It's found that the use of Xalacom in highly myopic eyes resulted  
45  
46 498 in a 10% reduction in baseline IOP for 90% of the cases. Additionally, the use of IOP  
47  
48 499 reduction medications slowed down axial elongation in approximately 70% of highly  
49  
50 500 myopic eyes. Therefore, we set the target IOP reduction at 10% below the baseline,  
51  
52 501 selected Xalacom as the preferred medication, and performed sample size calculations  
53  
54 502 based on these findings.

55  
56 503

### 57 58 504 **Study progress**

1  
2  
3  
4 505 The recruitment period of this study has started in June 2023 in ZOC. As of September  
5  
6 506 2023, we have included 47 participants.  
7  
8 507

9  
10 508 **Acknowledgement:** We thank all the members of the Glaucoma Suspects with High  
11  
12 509 Myopia Study Group (GSHM) Study Group for conducting this trial. And also, we  
13  
14 510 thank all staff in clinical research center of ZOC for their effort in this study.  
15

16 511

17  
18 512 ***GSHM study group***

19  
20 513 Principal investigators:

21  
22 514 Xiulan Zhang, Yizhi Liu, Lin Lv, David Friedman, Jost B. Jonas, and Tin Aung.

23  
24 515 Members:

25  
26 516 Shida Chen, Wei Wang, Fengbin Lin, Yunhe Song, Peiyuan Wang, Kangjie Kong,  
27

28 517 Jingwen Jiang, Fei Li, Kai Gao, Bingqian Liu, Yuhong Liu, and Meiling Chen.

29  
30 518 Steering committee:

31  
32 519 Neil M. Bressler, Ki Ho Park, Mingguang He, Kyoko Ohno-Matsui, Dennis S.C. Lam,  
33  
34 520 and Robert N. Weinreb.

35  
36 521 Data monitoring committee:

37  
38 522 Ching-Yu Cheng, Paul Healey, and Linda M. Zangwill.

39  
40 523 Safety supervision committee:

41  
42 524 Xiang Chen and Guangxian Tang.

43  
44 525 Biostatistics and data monitoring center:

45  
46 526 Ling Jin.  
47

48 527

49  
50 528 **Funding/Support:** This article was supported by the National Key R&D Program of  
51  
52 529 China (2022YFC2502800); the High-level Hospital Construction Project, Zhongshan  
53  
54 530 Ophthalmic Center, Sun Yat-sen University (303020104); the National Natural Science  
55  
56 531 Foundation of China (82070955); the Science and Technology Program of Guangzhou,  
57  
58 532 China (202201020362, 202102010209 2024A03J00515); Natural Science Foundation  
59  
60

1  
2  
3  
4 533 of Guangdong Province (2020A1515011282). The funding organizations had no role  
5  
6 534 in the design or conduct of this article.  
7

8 535

9  
10 536 **Contributors:** XZ, FL, JBJ, XG and SC participated in the study design. JJ, TL and  
11  
12 537 FL wrote the primary protocol manuscript. XZ, DSL and JBJ revised the manuscript.  
13  
14 538 KK, PW and YS contributed to data collecting. LJ and WZ helped with sample size  
15  
16 539 calculation and were the statistical consultants. YL, JC and MC were clinical research  
17  
18 540 coordinators of the project.  
19

20 541

21  
22 542 **Competing interest:** Jost B. Jonas: European patent EP 3,271,392, JP 2021-  
23  
24 543 119187, and US 2021 0340237 A1: Agents for use in the therapeutic or  
25  
26 544 prophylactic treatment of myopia or hyperopia; European patent application  
27  
28 545 23196899.1 “EGFR Antagonists for the treatment of diseases involving unwanted  
29  
30 546 migration, proliferation, and metaplasia of retinal pigment epithelium (RPE)  
31  
32 547 cells”.  
33

34 548

35  
36 549 **Patient and public involvement:** Patients and/or the public were not involved in the  
37  
38 550 design, or conduct, or reporting, or dissemination plans of this research.  
39

40 551

41  
42 552 Patient consent for publication: Not applicable  
43

44 553

45  
46 554  
47

48 555

49  
50 556

51  
52 557

53  
54 558

55  
56 559

57  
58 560  
59  
60

561 **References**

- 562 1. Yusufu M, Bukhari J, Yu X, et al. Challenges in eye care in the Asia-Pacific region. *Asia*  
563 *Pac J Ophthalmol (Phila)*. 2021;10(5):423-429. doi:10.1097/APO.0000000000000391.
- 564 2. Sankaridurg P, Berntsen DA, Bullimore MA, et al. IMI 2023 Digest. *Invest Ophthalmol*  
565 *Vis Sci*. 2023;64(6):7. doi:10.1167/iovs.64.6.7.
- 566 3. Holden BA, Fricke TR, Wilson DA, et al. Global prevalence of myopia and high myopia  
567 and temporal trends from 2000 through 2050. *Ophthalmology*. 2016;123:1036-1042. doi:  
568 10.1016/j.ophtha.2016.01.006.
- 569 4. Fricke TR, Jong M, Naidoo KS, et al. Global prevalence of visual impairment associated  
570 with myopic macular degeneration and temporal trends from 2000 through 2050:  
571 systematic review, meta-analysis and modelling. *Br J Ophthalmol*. 2018;102:855-862.  
572 doi: 10.1136/bjophthalmol-2017-311266.
- 573 5. Morgan IG, Jan CL. China turns to school reform to control the myopia epidemic: a  
574 narrative review. *Asia Pac J Ophthalmol (Phila)*. 2022;11:27-35. doi:  
575 10.1097/APO.0000000000000489.
- 576 6. Parolini B, Palmieri M, Finzi A, et al. Myopic traction maculopathy: a new perspective  
577 on classification and management. *Asia Pac J Ophthalmol (Phila)*. 2021;10:49-59. doi:  
578 10.1097/APO.0000000000000347.
- 579 7. Haarman AEG, Enthoven CA, Tideman JW, et al. The complications of myopia: a  
580 review and meta-analysis. *Invest Ophthalmol Vis Sci*. 2020;61:49. doi:  
581 10.1167/iovs.61.4.49.
- 582 8. Ha A, Kim CY, Shim SR, et al. Degree of myopia and glaucoma risk: a dose-response  
583 meta-analysis. *Am J Ophthalmol*. 2022;236:107-119. doi: 10.1016/j.ajo.2021.10.007.
- 584 9. Du R, Xie S, Igarashi-Yokoi T, et al. Continued increase of axial length and its risk  
585 factors in adults with high myopia. *JAMA Ophthalmol*. 2021;139(10):1096-1103.  
586 doi:10.1001/jamaophthalmol.2021.3303.



- 1  
2  
3  
4 587 10. Jonas JB, Spaide RF, Ostrin LA, Logan NS, Flitcroft I, Panda-Jonas S. IMI-  
5  
6 588 Nonpathological human ocular tissue changes with axial myopia. *Invest Ophthalmol Vis*  
7  
8 589 *Sci.* 2023;64(6):5. doi:10.1167/iovs.64.6.5.
- 9  
10 590 11. Lee MW, Lee SE, Lim HB, Kim JY. Longitudinal changes in axial length in high myopia:  
11  
12 591 a 4-year prospective study. *Br J Ophthalmol.* 2020;104(5):600-603.  
13  
14 592 doi:10.1136/bjophthalmol-2019-314619.
- 15  
16 593 12. El-Nimri NW, Wildsoet CF. Effects of topical latanoprost on intraocular pressure and  
17  
18 594 myopia progression in young guinea pigs. *Invest Ophthalmol Vis Sci.* 2018;59(6):2644-  
19  
20 595 2651. doi:10.1167/iovs.17-22890.
- 21  
22 596 13. Yang J, Pan M, Reinach PS, et al. Prostaglandin F2 $\alpha$  receptor modulation affects eye  
23  
24 597 development in guinea pigs. *Basic Clin Pharmacol Toxicol.* 2018;123(3):263-270.  
25  
26 598 doi:10.1111/bcpt.13017.
- 27  
28 599 14. Igarashi-Yokoi T, Shinohara K, Fang Y, et al. Prognostic factors for axial length  
29  
30 600 elongation and posterior staphyloma in adults with high myopia: a Japanese  
31  
32 601 observational study. *Am J Ophthalmol.* 2021;225:76-85. doi:10.1016/j.ajo.2020.11.023.
- 33  
34 602 15. Chong RS, Li H, Cheong AJY, et al. Mendelian randomization implicates bidirectional  
35  
36 603 association between myopia and primary open-angle glaucoma or intraocular pressure.  
37  
38 604 *Ophthalmology.* 2023;130(4):394-403. doi:10.1016/j.ophtha.2022.11.030.
- 39  
40 605 16. Wang P, Chen S, Liu Y, et al. Lowering intraocular pressure: a potential approach for  
41  
42 606 controlling high myopia progression. *Invest Ophthalmol Vis Sci.* 2021;62(14):17.  
43  
44 607 doi:10.1167/iovs.62.14.17.
- 45  
46 608 17. Flitcroft DI, He M, Jonas JB, et al. IMI - Defining and classifying myopia: a proposed  
47  
48 609 set of standards for clinical and epidemiologic studies. *Invest Ophthalmol Vis Sci.*  
49  
50 610 2019;60(3):M20-M30. doi:10.1167/iovs.18-25957.
- 51  
52 611 18. Wolf S, Balciuniene VJ, Laganovska G, et al. RADIANCE: a randomized controlled  
53  
54 612 study of ranibizumab in patients with choroidal neovascularization secondary to  
55  
56 613 pathologic myopia. *Ophthalmology.* 2014;121(3):682-92.e2.  
57  
58 614 doi:10.1016/j.ophtha.2013.10.023.
- 59  
60

- 1  
2  
3  
4 615 19. Comparison of glaucomatous progression between untreated patients with normal-  
5  
6 616 tension glaucoma and patients with therapeutically reduced intraocular pressures.  
7  
8 617 Collaborative Normal-Tension Glaucoma Study Group. *Am J Ophthalmol.*  
9  
10 618 1998;126(4):487-497. doi:10.1016/s0002-9394(98)00223-2.  
11  
12 619 20. Garway-Heath DF, Lascaratos G, Bunce C, et al. The United Kingdom Glaucoma  
13  
14 620 Treatment Study: a multicenter, randomized, placebo-controlled clinical trial: design and  
15  
16 621 methodology. *Ophthalmology.* 2013;120(1):68-76. doi:10.1016/j.ophtha.2012.07.028.  
17  
18 622 21. Garway-Heath DF, Crabb DP, Bunce C, et al. Latanoprost for open-angle glaucoma  
19  
20 623 (UKGTS): a randomised, multicentre, placebo-controlled trial. *Lancet.*  
21  
22 624 2015;385(9975):1295-1304. doi:10.1016/S0140-6736(14)62111-5.  
23  
24 625 22. Leske MC, Heijl A, Hyman L, Bengtsson B. Early Manifest Glaucoma Trial: design and  
25  
26 626 baseline data. *Ophthalmology.* 1999;106(11):2144-2153. doi:10.1016/s0161-  
27  
28 627 6420(99)90497-9.  
29  
30 628 23. Lalezary M, Medeiros FA, Weinreb RN, et al. Baseline optical coherence tomography  
31  
32 629 predicts the development of glaucomatous change in glaucoma suspects. *Am J*  
33  
34 630 *Ophthalmol.* 2006;142(4):576-582. doi:10.1016/j.ajo.2006.05.004.  
35  
36 631 24. Keltner JL, Johnson CA, Anderson DR, et al. The association between glaucomatous  
37  
38 632 visual fields and optic nerve head features in the Ocular Hypertension Treatment Study.  
39  
40 633 *Ophthalmology.* 2006;113(9):1603-1612. doi:10.1016/j.ophtha.2006.05.061.  
41  
42 634 25. Ohno-Matsui K, Kawasaki R, Jonas JB, et al. International photographic classification  
43  
44 635 and grading system for myopic maculopathy. *Am J Ophthalmol.* 2015;159(5):877-83.e7.  
45  
46 636 doi:10.1016/j.ajo.2015.01.022.  
47  
48 637 26. Li Z, Liu R, Xiao O, et al. Progression of myopic maculopathy in highly myopic Chinese  
49  
50 638 eyes. *Invest Ophthalmol Vis Sci.* 2019;60(4):1096-1104. doi:10.1167/iovs.18-25800.  
51  
52 639 27. Farida FM, Hassan Farahat HG, Salem MS. Refraction errors in school children.  
53  
54 640 *Menoufia Med J.* 2018;31(1):293-298. doi:10.4103/mmj.mmj\_115\_17.  
55  
56  
57 641  
58  
59 642  
60

1  
2  
3  
4  
5  
6  
7  
8  
9  
10  
11  
12  
13  
14  
15  
16  
17  
18  
19  
20  
21  
22  
23  
24  
25  
26  
27  
28  
29  
30  
31  
32  
33  
34  
35  
36  
37  
38  
39  
40  
41  
42  
43  
44  
45  
46  
47  
48  
49  
50  
51  
52  
53  
54  
55  
56  
57  
58  
59  
60

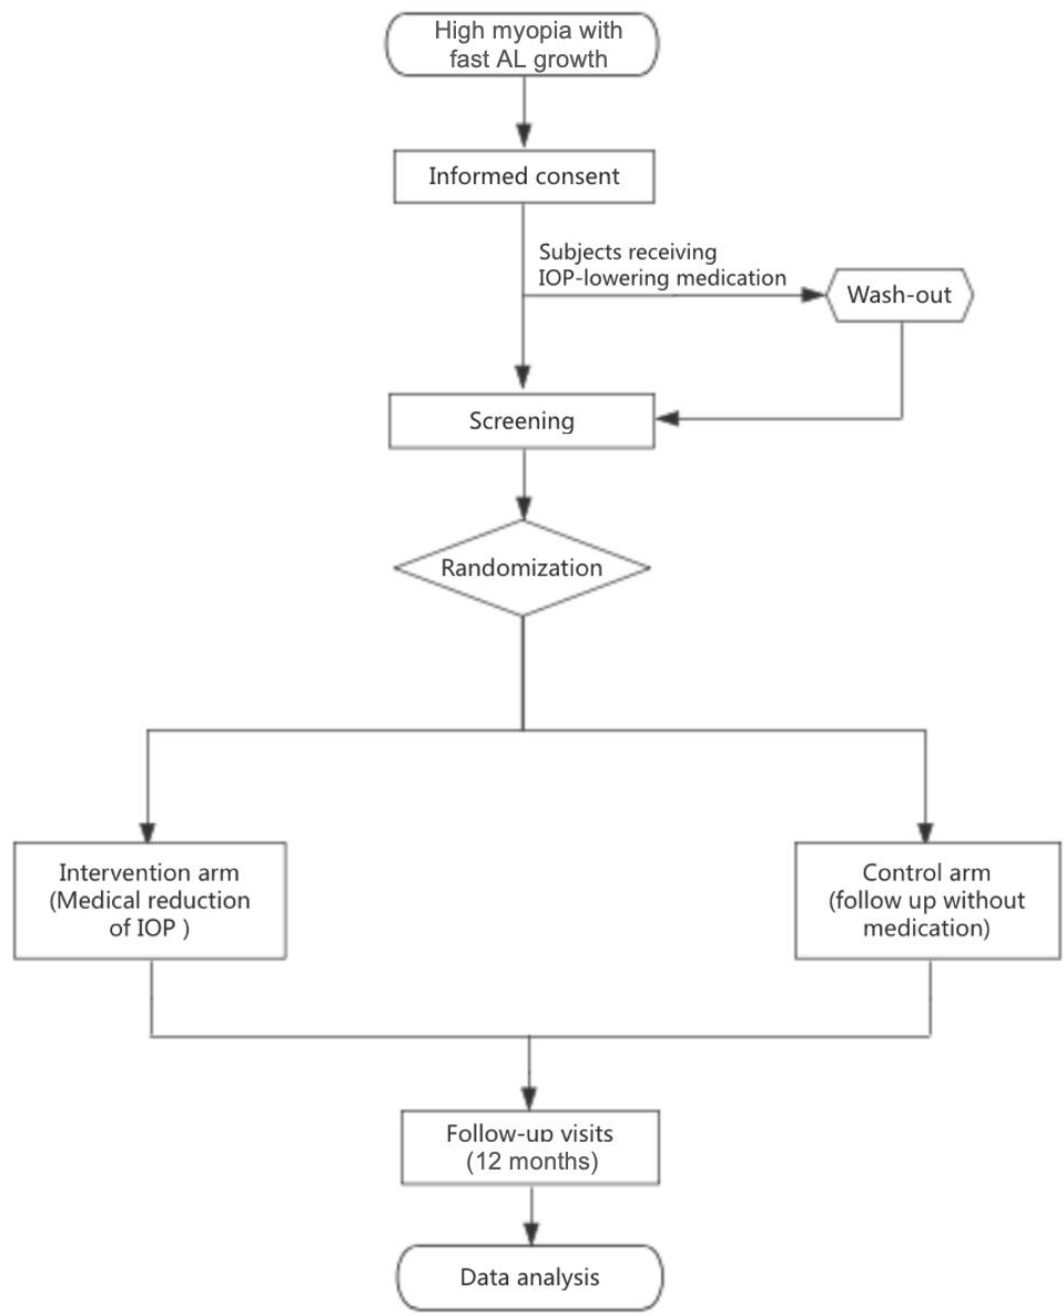

643  
644  
645

**Figure 1** Schematic of the PHM study design.

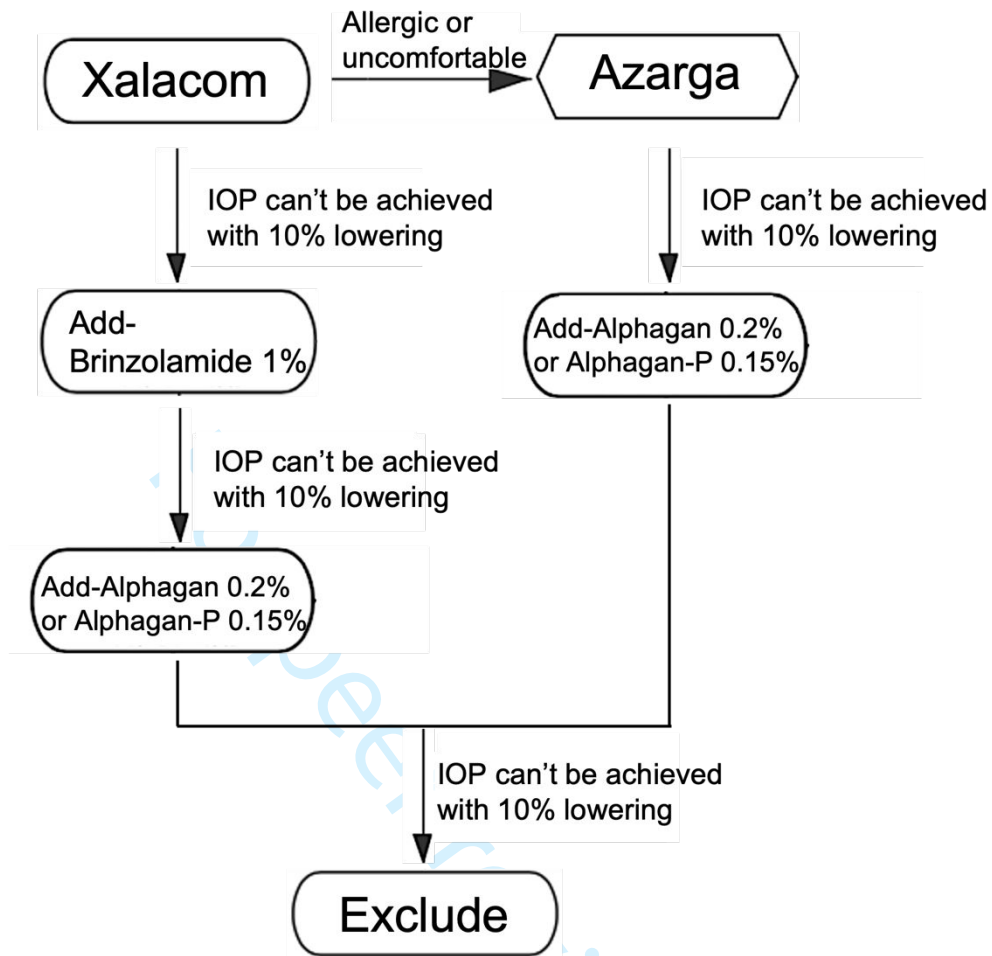

646

647 **Figure 2** The schematic of the intervention design.

648

649

650

651

652

653

654

655

656

657

658

659

660 **Table 1** Visit schedule

| Periods                         | Screening      | Baseline visit | Follow-up visits |                |                |
|---------------------------------|----------------|----------------|------------------|----------------|----------------|
| Visit                           | V <sub>0</sub> | V <sub>1</sub> | V <sub>2</sub>   | V <sub>3</sub> | V <sub>4</sub> |
| Timepoint                       | Day -14 to -1  | Day 0          | Week 4 (±7d)     | Week 26 (±14d) | Week 52 (±28d) |
| Enrolment                       |                |                |                  |                |                |
| Eligibility screen              | x              |                |                  |                |                |
| Informed consent                | x              |                |                  |                |                |
| History information             | x              |                |                  |                |                |
| Allocation                      |                | x              |                  |                |                |
| Interventions                   |                | x              | x                | x              | x              |
| Assessments                     |                |                |                  |                |                |
| Physical examination            |                | x              |                  |                |                |
| Pregnancy test                  |                | x              |                  |                |                |
| Visual acuity                   |                | x              | x                | x              | x              |
| Refraction                      |                | x              | x                | x              | x              |
| Slit lamp biomicroscopy         |                | x              | x                | x              | x              |
| Intraocular pressure            | x              | x              | x                | x              | x              |
| Axial length                    |                | x              | x                | x              | x              |
| Visual field                    |                | x              | x                | x              | x              |
| Fundus photography              |                | x              | x                | x              | x              |
| Optical coherence tomography    |                | x              | x                | x              | x              |
| Central corneal thickness       |                | x              | x                | x              | x              |
| Adverse events                  | x              | x              | x                | x              | x              |
| Combination drugs               | x              | x              | x                | x              | x              |
| Drug distribution               |                | x              | x                | x              |                |
| Drug recovery and investigation |                |                | x                | x              | x              |

661

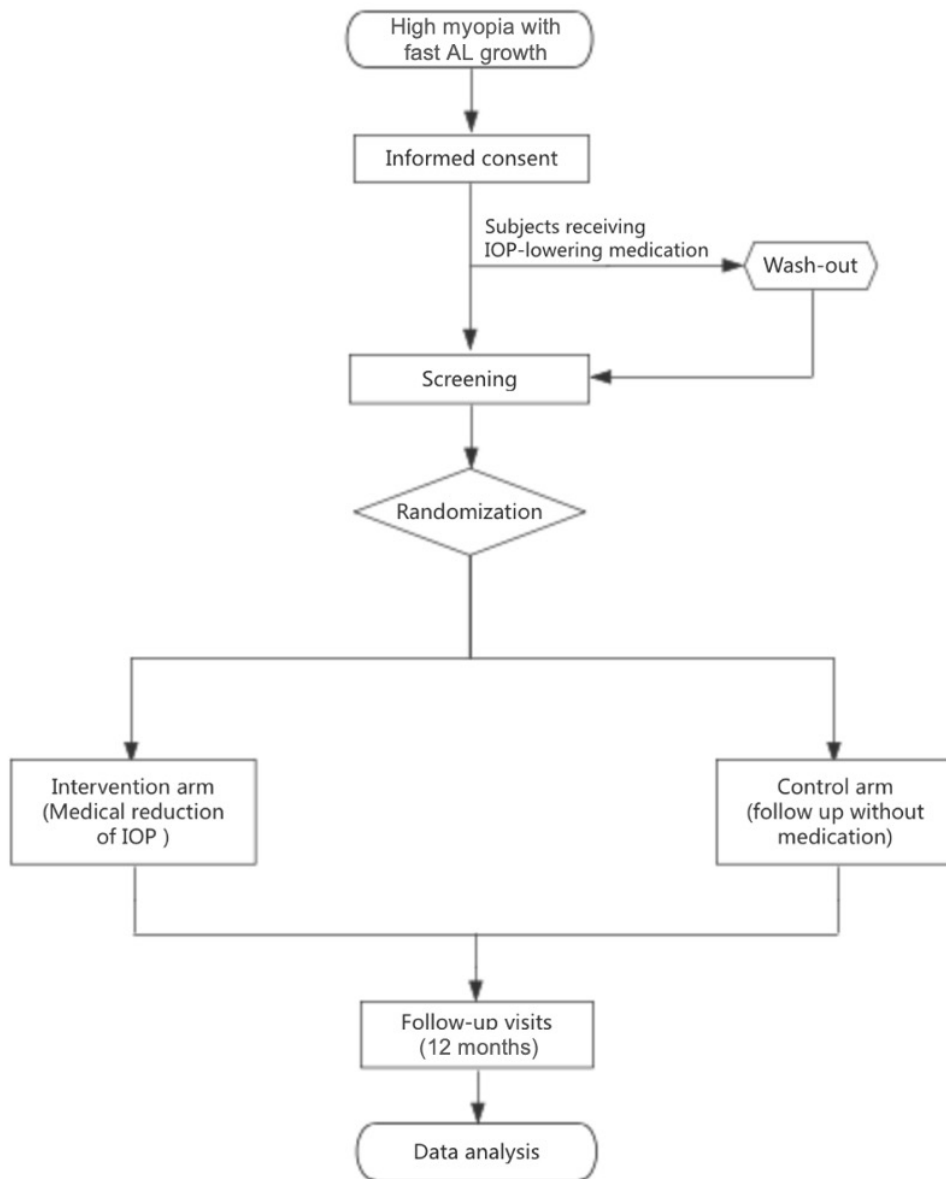

Figure 1

146x174mm (144 x 144 DPI)

1  
2  
3  
4  
5  
6  
7  
8  
9  
10  
11  
12  
13  
14  
15  
16  
17  
18  
19  
20  
21  
22  
23  
24  
25  
26  
27  
28  
29  
30  
31  
32  
33  
34  
35  
36  
37  
38  
39  
40  
41  
42  
43  
44  
45  
46  
47  
48  
49  
50  
51  
52  
53  
54  
55  
56  
57  
58  
59  
60

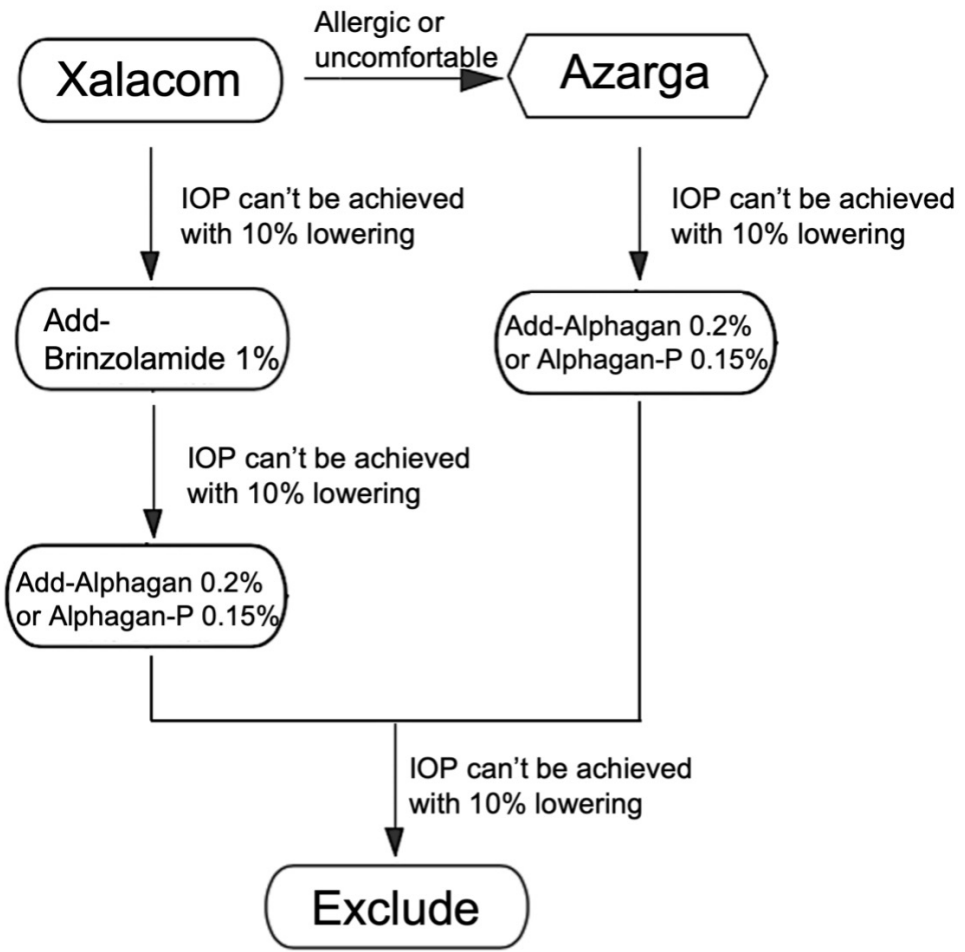

Figure 2

133x129mm (220 x 220 DPI)

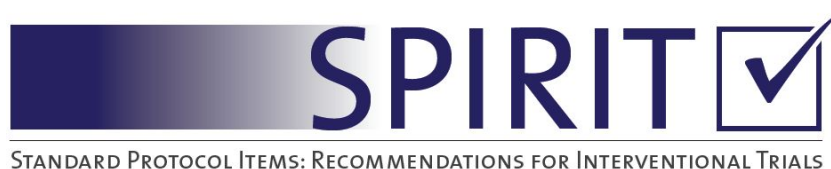

SPIRIT 2013 Checklist: Recommended items to address in a clinical trial protocol and related documents\*

| Section/item                      | Item No | Description                                                                                                                                                                                                                                                                              |
|-----------------------------------|---------|------------------------------------------------------------------------------------------------------------------------------------------------------------------------------------------------------------------------------------------------------------------------------------------|
| <b>Administrative information</b> |         |                                                                                                                                                                                                                                                                                          |
| Title                             | 1       | Descriptive title identifying the study design, population, interventions, and, if applicable, trial acronym                                                                                                                                                                             |
| Trial registration                | 2a      | Trial identifier and registry name. If not yet registered, name of intended registry                                                                                                                                                                                                     |
|                                   | 2b      | All items from the World Health Organization Trial Registration Data Set                                                                                                                                                                                                                 |
| Protocol version                  | 3       | Date and version identifier                                                                                                                                                                                                                                                              |
| Funding                           | 4       | Sources and types of financial, material, and other support                                                                                                                                                                                                                              |
| Roles and responsibilities        | 5a      | Names, affiliations, and roles of protocol contributors                                                                                                                                                                                                                                  |
|                                   | 5b      | Name and contact information for the trial sponsor                                                                                                                                                                                                                                       |
|                                   | 5c      | Role of study sponsor and funders, if any, in study design; collection, management, analysis, and interpretation of data; writing of the report; and the decision to submit the report for publication, including whether they will have ultimate authority over any of these activities |
|                                   | 5d      | Composition, roles, and responsibilities of the coordinating centre, steering committee, endpoint adjudication committee, data management team, and other individuals or groups overseeing the trial, if applicable (see Item 21a for data monitoring committee)                         |
| <b>Introduction</b>               |         |                                                                                                                                                                                                                                                                                          |
| Background and rationale          | 6a      | Description of research question and justification for undertaking the trial, including summary of relevant studies (published and unpublished) examining benefits and harms for each intervention                                                                                       |
|                                   | 6b      | Explanation for choice of comparators                                                                                                                                                                                                                                                    |
| Objectives                        | 7       | Specific objectives or hypotheses                                                                                                                                                                                                                                                        |
| Trial design                      | 8       | Description of trial design including type of trial (eg, parallel group, crossover, factorial, single group), allocation ratio, and framework (eg, superiority, equivalence, noninferiority, exploratory)                                                                                |



## Methods: Participants, interventions, and outcomes

|                      |     |                                                                                                                                                                                                                                                                                                                                                                                |
|----------------------|-----|--------------------------------------------------------------------------------------------------------------------------------------------------------------------------------------------------------------------------------------------------------------------------------------------------------------------------------------------------------------------------------|
| Study setting        | 9   | Description of study settings (eg, community clinic, academic hospital) and list of countries where data will be collected. Reference to where list of study sites can be obtained                                                                                                                                                                                             |
| Eligibility criteria | 10  | Inclusion and exclusion criteria for participants. If applicable, eligibility criteria for study centres and individuals who will perform the interventions (eg, surgeons, psychotherapists)                                                                                                                                                                                   |
| Interventions        | 11a | Interventions for each group with sufficient detail to allow replication, including how and when they will be administered                                                                                                                                                                                                                                                     |
|                      | 11b | Criteria for discontinuing or modifying allocated interventions for a given trial participant (eg, drug dose change in response to harms, participant request, or improving/worsening disease)                                                                                                                                                                                 |
|                      | 11c | Strategies to improve adherence to intervention protocols, and any procedures for monitoring adherence (eg, drug tablet return, laboratory tests)                                                                                                                                                                                                                              |
|                      | 11d | Relevant concomitant care and interventions that are permitted or prohibited during the trial                                                                                                                                                                                                                                                                                  |
| Outcomes             | 12  | Primary, secondary, and other outcomes, including the specific measurement variable (eg, systolic blood pressure), analysis metric (eg, change from baseline, final value, time to event), method of aggregation (eg, median, proportion), and time point for each outcome. Explanation of the clinical relevance of chosen efficacy and harm outcomes is strongly recommended |
| Participant timeline | 13  | Time schedule of enrolment, interventions (including any run-ins and washouts), assessments, and visits for participants. A schematic diagram is highly recommended (see Figure)                                                                                                                                                                                               |
| Sample size          | 14  | Estimated number of participants needed to achieve study objectives and how it was determined, including clinical and statistical assumptions supporting any sample size calculations                                                                                                                                                                                          |
| Recruitment          | 15  | Strategies for achieving adequate participant enrolment to reach target sample size                                                                                                                                                                                                                                                                                            |

## Methods: Assignment of interventions (for controlled trials)

### Allocation:

|                     |     |                                                                                                                                                                                                                                                                                                                                                          |
|---------------------|-----|----------------------------------------------------------------------------------------------------------------------------------------------------------------------------------------------------------------------------------------------------------------------------------------------------------------------------------------------------------|
| Sequence generation | 16a | Method of generating the allocation sequence (eg, computer-generated random numbers), and list of any factors for stratification. To reduce predictability of a random sequence, details of any planned restriction (eg, blocking) should be provided in a separate document that is unavailable to those who enrol participants or assign interventions |
|---------------------|-----|----------------------------------------------------------------------------------------------------------------------------------------------------------------------------------------------------------------------------------------------------------------------------------------------------------------------------------------------------------|

|    |                |     |                                                                         |
|----|----------------|-----|-------------------------------------------------------------------------|
| 1  |                |     |                                                                         |
| 2  | Allocation     | 16b | Mechanism of implementing the allocation sequence (eg, central          |
| 3  | concealment    |     | telephone; sequentially numbered, opaque, sealed envelopes),            |
| 4  | mechanism      |     | describing any steps to conceal the sequence until interventions are    |
| 5  |                |     | assigned                                                                |
| 6  |                |     |                                                                         |
| 7  | Implementation | 16c | Who will generate the allocation sequence, who will enrol participants, |
| 8  |                |     | and who will assign participants to interventions                       |
| 9  |                |     |                                                                         |
| 10 | Blinding       | 17a | Who will be blinded after assignment to interventions (eg, trial        |
| 11 | (masking)      |     | participants, care providers, outcome assessors, data analysts), and    |
| 12 |                |     | how                                                                     |
| 13 |                | 17b | If blinded, circumstances under which unblinding is permissible, and    |
| 14 |                |     | procedure for revealing a participant's allocated intervention during   |
| 15 |                |     | the trial                                                               |
| 16 |                |     |                                                                         |
| 17 |                |     |                                                                         |
| 18 |                |     |                                                                         |
| 19 |                |     |                                                                         |

### Methods: Data collection, management, and analysis

|    |                 |     |                                                                          |
|----|-----------------|-----|--------------------------------------------------------------------------|
| 20 |                 |     |                                                                          |
| 21 | Data collection | 18a | Plans for assessment and collection of outcome, baseline, and other      |
| 22 | methods         |     | trial data, including any related processes to promote data quality (eg, |
| 23 |                 |     | duplicate measurements, training of assessors) and a description of      |
| 24 |                 |     | study instruments (eg, questionnaires, laboratory tests) along with      |
| 25 |                 |     | their reliability and validity, if known. Reference to where data        |
| 26 |                 |     | collection forms can be found, if not in the protocol                    |
| 27 |                 | 18b | Plans to promote participant retention and complete follow-up,           |
| 28 |                 |     | including list of any outcome data to be collected for participants who  |
| 29 |                 |     | discontinue or deviate from intervention protocols                       |
| 30 |                 |     |                                                                          |
| 31 | Data            | 19  | Plans for data entry, coding, security, and storage, including any       |
| 32 | management      |     | related processes to promote data quality (eg, double data entry;        |
| 33 |                 |     | range checks for data values). Reference to where details of data        |
| 34 |                 |     | management procedures can be found, if not in the protocol               |
| 35 |                 |     |                                                                          |
| 36 | Statistical     | 20a | Statistical methods for analysing primary and secondary outcomes.        |
| 37 | methods         |     | Reference to where other details of the statistical analysis plan can be |
| 38 |                 |     | found, if not in the protocol                                            |
| 39 |                 | 20b | Methods for any additional analyses (eg, subgroup and adjusted           |
| 40 |                 |     | analyses)                                                                |
| 41 |                 | 20c | Definition of analysis population relating to protocol non-adherence     |
| 42 |                 |     | (eg, as randomised analysis), and any statistical methods to handle      |
| 43 |                 |     | missing data (eg, multiple imputation)                                   |
| 44 |                 |     |                                                                          |
| 45 |                 |     |                                                                          |
| 46 |                 |     |                                                                          |
| 47 |                 |     |                                                                          |
| 48 |                 |     |                                                                          |
| 49 |                 |     |                                                                          |
| 50 |                 |     |                                                                          |
| 51 |                 |     |                                                                          |

### Methods: Monitoring

|    |                 |     |                                                                      |
|----|-----------------|-----|----------------------------------------------------------------------|
| 52 |                 |     |                                                                      |
| 53 | Data monitoring | 21a | Composition of data monitoring committee (DMC); summary of its role  |
| 54 |                 |     | and reporting structure; statement of whether it is independent from |
| 55 |                 |     | the sponsor and competing interests; and reference to where further  |
| 56 |                 |     | details about its charter can be found, if not in the protocol.      |
| 57 |                 |     | Alternatively, an explanation of why a DMC is not needed             |
| 58 |                 |     |                                                                      |
| 59 |                 |     |                                                                      |
| 60 |                 |     |                                                                      |

|    |          |     |                                                                        |
|----|----------|-----|------------------------------------------------------------------------|
| 1  |          |     |                                                                        |
| 2  |          | 21b | Description of any interim analyses and stopping guidelines, including |
| 3  |          |     | who will have access to these interim results and make the final       |
| 4  |          |     | decision to terminate the trial                                        |
| 5  |          |     |                                                                        |
| 6  | Harms    | 22  | Plans for collecting, assessing, reporting, and managing solicited and |
| 7  |          |     | spontaneously reported adverse events and other unintended effects     |
| 8  |          |     | of trial interventions or trial conduct                                |
| 9  |          |     |                                                                        |
| 10 | Auditing | 23  | Frequency and procedures for auditing trial conduct, if any, and       |
| 11 |          |     | whether the process will be independent from investigators and the     |
| 12 |          |     | sponsor                                                                |
| 13 |          |     |                                                                        |
| 14 |          |     |                                                                        |

### Ethics and dissemination

|    |                               |     |                                                                                                                                                                                                                                                                                     |
|----|-------------------------------|-----|-------------------------------------------------------------------------------------------------------------------------------------------------------------------------------------------------------------------------------------------------------------------------------------|
| 15 |                               |     |                                                                                                                                                                                                                                                                                     |
| 16 |                               |     |                                                                                                                                                                                                                                                                                     |
| 17 | Research ethics approval      | 24  | Plans for seeking research ethics committee/institutional review board (REC/IRB) approval                                                                                                                                                                                           |
| 18 |                               |     |                                                                                                                                                                                                                                                                                     |
| 19 |                               |     |                                                                                                                                                                                                                                                                                     |
| 20 | Protocol amendments           | 25  | Plans for communicating important protocol modifications (eg, changes to eligibility criteria, outcomes, analyses) to relevant parties (eg, investigators, REC/IRBs, trial participants, trial registries, journals, regulators)                                                    |
| 21 |                               |     |                                                                                                                                                                                                                                                                                     |
| 22 |                               |     |                                                                                                                                                                                                                                                                                     |
| 23 |                               |     |                                                                                                                                                                                                                                                                                     |
| 24 |                               |     |                                                                                                                                                                                                                                                                                     |
| 25 |                               |     |                                                                                                                                                                                                                                                                                     |
| 26 | Consent or assent             | 26a | Who will obtain informed consent or assent from potential trial participants or authorised surrogates, and how (see Item 32)                                                                                                                                                        |
| 27 |                               |     |                                                                                                                                                                                                                                                                                     |
| 28 |                               |     |                                                                                                                                                                                                                                                                                     |
| 29 |                               | 26b | Additional consent provisions for collection and use of participant data and biological specimens in ancillary studies, if applicable                                                                                                                                               |
| 30 |                               |     |                                                                                                                                                                                                                                                                                     |
| 31 |                               |     |                                                                                                                                                                                                                                                                                     |
| 32 | Confidentiality               | 27  | How personal information about potential and enrolled participants will be collected, shared, and maintained in order to protect confidentiality before, during, and after the trial                                                                                                |
| 33 |                               |     |                                                                                                                                                                                                                                                                                     |
| 34 |                               |     |                                                                                                                                                                                                                                                                                     |
| 35 |                               |     |                                                                                                                                                                                                                                                                                     |
| 36 |                               |     |                                                                                                                                                                                                                                                                                     |
| 37 | Declaration of interests      | 28  | Financial and other competing interests for principal investigators for the overall trial and each study site                                                                                                                                                                       |
| 38 |                               |     |                                                                                                                                                                                                                                                                                     |
| 39 |                               |     |                                                                                                                                                                                                                                                                                     |
| 40 | Access to data                | 29  | Statement of who will have access to the final trial dataset, and disclosure of contractual agreements that limit such access for investigators                                                                                                                                     |
| 41 |                               |     |                                                                                                                                                                                                                                                                                     |
| 42 |                               |     |                                                                                                                                                                                                                                                                                     |
| 43 |                               |     |                                                                                                                                                                                                                                                                                     |
| 44 |                               |     |                                                                                                                                                                                                                                                                                     |
| 45 | Ancillary and post-trial care | 30  | Provisions, if any, for ancillary and post-trial care, and for compensation to those who suffer harm from trial participation                                                                                                                                                       |
| 46 |                               |     |                                                                                                                                                                                                                                                                                     |
| 47 |                               |     |                                                                                                                                                                                                                                                                                     |
| 48 | Dissemination policy          | 31a | Plans for investigators and sponsor to communicate trial results to participants, healthcare professionals, the public, and other relevant groups (eg, via publication, reporting in results databases, or other data sharing arrangements), including any publication restrictions |
| 49 |                               |     |                                                                                                                                                                                                                                                                                     |
| 50 |                               |     |                                                                                                                                                                                                                                                                                     |
| 51 |                               |     |                                                                                                                                                                                                                                                                                     |
| 52 |                               |     |                                                                                                                                                                                                                                                                                     |
| 53 |                               |     |                                                                                                                                                                                                                                                                                     |
| 54 |                               | 31b | Authorship eligibility guidelines and any intended use of professional writers                                                                                                                                                                                                      |
| 55 |                               |     |                                                                                                                                                                                                                                                                                     |
| 56 |                               |     |                                                                                                                                                                                                                                                                                     |
| 57 |                               | 31c | Plans, if any, for granting public access to the full protocol, participant-level dataset, and statistical code                                                                                                                                                                     |
| 58 |                               |     |                                                                                                                                                                                                                                                                                     |
| 59 |                               |     |                                                                                                                                                                                                                                                                                     |
| 60 |                               |     |                                                                                                                                                                                                                                                                                     |

## Appendices

|                            |    |                                                                                                                                                                                                |
|----------------------------|----|------------------------------------------------------------------------------------------------------------------------------------------------------------------------------------------------|
| Informed consent materials | 32 | Model consent form and other related documentation given to participants and authorised surrogates                                                                                             |
| Biological specimens       | 33 | Plans for collection, laboratory evaluation, and storage of biological specimens for genetic or molecular analysis in the current trial and for future use in ancillary studies, if applicable |

---

\*It is strongly recommended that this checklist be read in conjunction with the SPIRIT 2013 Explanation & Elaboration for important clarification on the items. Amendments to the protocol should be tracked and dated. The SPIRIT checklist is copyrighted by the SPIRIT Group under the Creative Commons "[Attribution-NonCommercial-NoDerivs 3.0 Unported](#)" license.

For peer review only

# BMJ Open

## Effect of Intraocular Pressure Reduction on Progressive High Myopia (PHM study): Study Protocol of a Randomized Controlled Trial

|                                 |                                                                                                                                                                                                                                                                                                                                                                                                                                                                                                                                                                                                                                                                                                                                                                                                                                                                                                                                                                                                                                                                                                                                                                                                                                                                                                                                                                                                                                                                                                                                                                                                                                                                                                                                                                                                                                                                                                                                                                                                    |
|---------------------------------|----------------------------------------------------------------------------------------------------------------------------------------------------------------------------------------------------------------------------------------------------------------------------------------------------------------------------------------------------------------------------------------------------------------------------------------------------------------------------------------------------------------------------------------------------------------------------------------------------------------------------------------------------------------------------------------------------------------------------------------------------------------------------------------------------------------------------------------------------------------------------------------------------------------------------------------------------------------------------------------------------------------------------------------------------------------------------------------------------------------------------------------------------------------------------------------------------------------------------------------------------------------------------------------------------------------------------------------------------------------------------------------------------------------------------------------------------------------------------------------------------------------------------------------------------------------------------------------------------------------------------------------------------------------------------------------------------------------------------------------------------------------------------------------------------------------------------------------------------------------------------------------------------------------------------------------------------------------------------------------------------|
| Journal:                        | <i>BMJ Open</i>                                                                                                                                                                                                                                                                                                                                                                                                                                                                                                                                                                                                                                                                                                                                                                                                                                                                                                                                                                                                                                                                                                                                                                                                                                                                                                                                                                                                                                                                                                                                                                                                                                                                                                                                                                                                                                                                                                                                                                                    |
| Manuscript ID                   | bmjopen-2024-084068.R1                                                                                                                                                                                                                                                                                                                                                                                                                                                                                                                                                                                                                                                                                                                                                                                                                                                                                                                                                                                                                                                                                                                                                                                                                                                                                                                                                                                                                                                                                                                                                                                                                                                                                                                                                                                                                                                                                                                                                                             |
| Article Type:                   | Protocol                                                                                                                                                                                                                                                                                                                                                                                                                                                                                                                                                                                                                                                                                                                                                                                                                                                                                                                                                                                                                                                                                                                                                                                                                                                                                                                                                                                                                                                                                                                                                                                                                                                                                                                                                                                                                                                                                                                                                                                           |
| Date Submitted by the Author:   | 23-Mar-2024                                                                                                                                                                                                                                                                                                                                                                                                                                                                                                                                                                                                                                                                                                                                                                                                                                                                                                                                                                                                                                                                                                                                                                                                                                                                                                                                                                                                                                                                                                                                                                                                                                                                                                                                                                                                                                                                                                                                                                                        |
| Complete List of Authors:       | Jiang, Jingwen; Sun Yat-Sen University Zhongshan Ophthalmic Center State Key Laboratory of Ophthalmology, Clinical research center<br>Lin, Tingting; Sun Yat-Sen University Zhongshan Ophthalmic Center State Key Laboratory of Ophthalmology, Clinical research center; Daqing Oilfield General Hospital<br>Lin, Fengbin; Sun Yat-Sen University Zhongshan Ophthalmic Center State Key Laboratory of Ophthalmology<br>Kong, Kangjie; Sun Yat-Sen University Zhongshan Ophthalmic Center State Key Laboratory of Ophthalmology, Clinical research center<br>Wang, Peiyuan; Sun Yat-Sen University Zhongshan Ophthalmic Center State Key Laboratory of Ophthalmology, Clinical research center<br>Song, Yunhe; Sun Yat-Sen University Zhongshan Ophthalmic Center State Key Laboratory of Ophthalmology<br>Zhou, Fengqi; Mayo Clinic College of Medicine and Science<br>Wang, Zhenyu; Sun Yat-Sen University Zhongshan Ophthalmic Center State Key Laboratory of Ophthalmology<br>Jin, Ling; Sun Yat-Sen University Zhongshan Ophthalmic Center State Key Laboratory of Ophthalmology, Clinical research center<br>Liu, Yuhong; Sun Yat-Sen University Zhongshan Ophthalmic Center State Key Laboratory of Ophthalmology, Clinical research center<br>Gao, Xinbo; Sun Yat-Sen University Zhongshan Ophthalmic Center State Key Laboratory of Ophthalmology<br>Chen, Jinmei; Sun Yat-Sen University Zhongshan Ophthalmic Center State Key Laboratory of Ophthalmology, Clinical research center<br>Chen, Meiling; Sun Yat-Sen University Zhongshan Ophthalmic Center State Key Laboratory of Ophthalmology<br>Lam, Dennis SC; The Chinese University of Hong Kong<br>Jonas, Jost; Heidelberg University, Ophthalmology; Institute of Molecular and Clinical Ophthalmology Basel,<br>Chen, Shida; Sun Yat-Sen University Zhongshan Ophthalmic Center State Key Laboratory of Ophthalmology<br>Zhang, Xiulan; Sun Yat-Sen University Zhongshan Ophthalmic Center State Key Laboratory of Ophthalmology |
| <b>Primary Subject Heading</b>: | Ophthalmology                                                                                                                                                                                                                                                                                                                                                                                                                                                                                                                                                                                                                                                                                                                                                                                                                                                                                                                                                                                                                                                                                                                                                                                                                                                                                                                                                                                                                                                                                                                                                                                                                                                                                                                                                                                                                                                                                                                                                                                      |
| Secondary Subject Heading:      | Ophthalmology                                                                                                                                                                                                                                                                                                                                                                                                                                                                                                                                                                                                                                                                                                                                                                                                                                                                                                                                                                                                                                                                                                                                                                                                                                                                                                                                                                                                                                                                                                                                                                                                                                                                                                                                                                                                                                                                                                                                                                                      |

1  
2  
3  
4  
5  
6  
7  
8  
9  
10  
11  
12  
13  
14  
15  
16  
17  
18  
19  
20  
21  
22  
23  
24  
25  
26  
27  
28  
29  
30  
31  
32  
33  
34  
35  
36  
37  
38  
39  
40  
41  
42  
43  
44  
45  
46  
47  
48  
49  
50  
51  
52  
53  
54  
55  
56  
57  
58  
59  
60

|           |                                                                      |
|-----------|----------------------------------------------------------------------|
| Keywords: | Randomized Controlled Trial, OPHTHALMOLOGY, Glaucoma < OPHTHALMOLOGY |
|           |                                                                      |

SCHOLARONE™  
Manuscripts

1  
2  
3  
4 1 **Effect of Intraocular Pressure Reduction on Progressive High**  
5 **Myopia (PHM study): Study Protocol of a Randomized**  
6 **Controlled Trial**  
7  
8  
9  
10 4

11  
12 5 Jingwen Jiang, MD<sup>1, \*</sup>, Tingting Lin, MD<sup>1, \*</sup>, Fengbin Lin, MD, PhD<sup>1</sup>, Kangjie  
13 6 Kong, MD<sup>1</sup>, Peiyuan Wang, MD, PhD<sup>1</sup>, Yunhe Song, MD, PhD<sup>1</sup>, Fengqi Zhou,  
14 7 OD<sup>2</sup>, Zhenyu Wang, MSc<sup>1</sup>, Ling Jin, MSc<sup>1</sup>, Yuhong Liu, MSc<sup>1</sup>, Xinbo Gao, MD,  
15 8 PhD<sup>1</sup>, Jinmei Chen, MBBS<sup>1</sup>, Meiling Chen, MBBS<sup>1</sup>, Dennis SC Lam, MD<sup>3</sup>, Jost  
16 9 B. Jonas, MD<sup>4,5</sup>, Shida Chen, MD, PhD<sup>1, †</sup>, Xiulan Zhang, MD, PhD<sup>1, †</sup>, for the  
17 10 Glaucoma Suspects with High Myopia Study Group  
18  
19  
20  
21  
22  
23  
24  
25

26 12 <sup>1</sup>State Key Laboratory of Ophthalmology, Zhongshan Ophthalmic Center, Sun  
27 13 Yat-sen University, Guangdong Provincial Key Laboratory of Ophthalmology and  
28 14 Visual Science, Guangdong Provincial Clinical Research Center for Ocular  
29 15 Diseases, Guangzhou 510623, China.

30 16 <sup>2</sup>Mayo Clinic College of Medicine, Rochester, MN 55902, USA.

31 17 <sup>3</sup>The International Eye Research Institute, the Chinese University of Hong Kong  
32 18 (Shenzhen), Shenzhen, China.

33 19 <sup>4</sup>Department of Ophthalmology, Medical Faculty Mannheim, Heidelberg  
34 20 University, Mannheim, Germany.

35 21 <sup>5</sup>Institute of Molecular and Clinical Ophthalmology, Basel, Switzerland.  
36  
37  
38  
39  
40  
41  
42  
43  
44  
45  
46  
47  
48  
49  
50  
51  
52  
53  
54  
55  
56  
57  
58  
59  
60

23 \* Jingwen Jiang and Tingting Lin contributed equally.

24 Tingting Lin is a visiting doctor at Zhongshan Ophthalmic Center.

26 †**Corresponding Author**

27 Xiulan Zhang, MD, PhD

28 State Key Laboratory of Ophthalmology, Zhongshan Ophthalmic Center, Sun Yat-  
29 Sen University, No.7 Jinsui Road, Guangzhou 510060, China.

1  
2  
3 30 Phone number:+86 135 7016 6308

4  
5 31 Email: zhangxl2@mail.sysu.edu.cn

6  
7 32

8  
9 33 Shida Chen, MD, PhD

10 34 State Key Laboratory of Ophthalmology, Zhongshan Ophthalmic Center, Sun Yat-  
11 Sen University, No.7 Jinsui Road, Guangzhou 510060, China.

12 35  
13 36 Email: chenshd3@mail.sysu.edu.cn

14  
15 37

16  
17  
18 38 **Competing Interest Statement and Financial Disclosure:**

19  
20 39 Jost B. Jonas: European patent EP 3,271,392, JP 2021-119187, and US 2021  
21 0340237 A1: Agents for use in the therapeutic or prophylactic treatment of myopia  
22 or hyperopia; European patent application 23196899.1 “EGFR Antagonists for the  
23 treatment of diseases involving unwanted migration, proliferation, and metaplasia  
24 of retinal pigment epithelium (RPE) cells”.

25  
26 44

27 45 **Ethics Statement:** The study was approved by the ethical committee of the  
28 Zhongshan Ophthalmic Center and adhered to the tenets of the Declaration of  
29 Helsinki. Written informed consent was obtained from all subjects.

30  
31 48

32 49 **Key Words:** High myopia, Axial length, Intraocular pressure, Randomized  
33 controlled trial

34  
35 51

36  
37 52

38  
39 53

40  
41 54

42  
43 55

44  
45 56

46  
47 57

48  
49 58



1  
2  
3  
4 59 **ABSTRACT**

5  
6 60 **Background** In adult patients with high myopia (HM), progressive axial elongation  
7  
8 61 poses a significant risk for the development of subsequent ocular complications that  
9  
10 62 may lead to visual impairment. Effective strategies to reduce or prevent further axial  
11  
12 63 elongation in highly myopic adult patients have not been available so far. Recent studies  
13  
14 64 suggested that medically lowering intraocular pressure (IOP) may reduce axial  
15  
16 65 elongation.

17  
18 66 **Objective** This clinical randomized controlled trial (RCT) aims to evaluate the efficacy  
19  
20 67 of medical IOP reduction in adult patients with progressive HM (PHM).

21  
22 68 **Trial Design** Single-center, open-label, prospective RCT.

23  
24 69 **Methods** This RCT will recruit 152 participants with PHM at the Zhongshan  
25  
26 70 Ophthalmic Center (ZOC). Randomized in a ratio of 1:1, participants will receive IOP-  
27  
28 71 lowering eyedrops (intervention group) or will be followed without treatment (control  
29  
30 72 group) for 12 months. Follow-up visits will be conducted at 1, 6, and 12 months after  
31  
32 73 baseline. Only one eye per eligible participant will be included for analysis. The  
33  
34 74 primary outcome is the change in axial length (AL) within the study period of 12  
35  
36 75 months. Secondary outcomes include the incidence and progression of visual field (VF)  
37  
38 76 defects, changes in optic disc morphology and incidence and progression of myopic  
39  
40 77 maculopathy. Difference in AL changes between the two groups will be analyzed using  
41  
42 78 linear regression analysis. For the secondary outcomes, a multifactor Poisson  
43  
44 79 regression within a generalized linear model will be utilized to estimate the relative risk  
45  
46 80 of progression in VF defects and myopic maculopathy, and the rate of thinning in retinal  
47  
48 81 nerve fiber layer and ganglion cell-inner plexiform will be assessed through Kaplan-  
49  
50 82 Meier curves and log-rank tests.

51  
52 83 **Ethics and dissemination** Full ethics approval for this trial has been obtained from the  
53  
54 84 Ethics Committee of ZOC, Sun Yat-sen University, China (ID: 2023KYPJ110). Results  
55  
56 85 of this trial will be disseminated through peer-reviewed journals and conference  
57  
58 86 presentations.

1  
2  
3  
4 87 **Trial registration number** NCT05850936 *clinicaltrials.gov*

5  
6 88

7  
8 89 **Strengths and limitations of this study**

9  
10 90 1. This study is to address a global healthcare concern: effectively mitigating  
11 91 further axial elongation in highly myopic adult patients.

12  
13  
14 92 2. We performed this RCT based on an on-going highly myopic cohort.

15  
16 93 3. Due to practical constraints, a double-masking in the study design cannot be  
17 94 achieved.

18  
19  
20 95 4. Participants are recruited from a single center.

21  
22 96

23  
24 97

25  
26 98

27  
28 99

29  
30 100

31  
32 101

33  
34 102

35  
36 103

37  
38 104

39  
40 105

41  
42 106

43  
44 107

45  
46 108

47  
48 109

49  
50 110

51  
52 111

53  
54 112

55  
56 113

57  
58 114

59  
60

## 115 **Introduction**

116 High myopia (HM) is an important global public health issue [1-2], with prevalence  
117 estimates of approximately 163 million individuals (2.7% of the world population)  
118 affected in 2000, and of approximately 938 million (9.8% of the world population)  
119 people estimated to be affected in 2050 [3-5]. High myopia-related complications, such  
120 as optic neuropathy, myopic maculopathy and retinal detachment, can lead to  
121 irreversible visual impairment [6-11].

122 Recent clinical studies have revealed that highly myopic eyes in adult patients can  
123 undergo further axial elongation with a rate up 0.1mm/year [12]. Axial elongation in  
124 highly myopic eyes is a major risk for progression of myopic macular degeneration and  
125 potentially of high myopia-associated optic neuropathy and subsequent vision  
126 impairment [13-14]. Effective strategies to reduce or stop further axial elongation in  
127 highly myopic eyes are warranted.

128 Recent experimental studies have suggested that medical reduction of intraocular  
129 pressure (IOP) could be protective against axial elongation in guinea pigs [15-16]. In a  
130 clinical observational study, application of IOP-lowering medication, but not the IOP-  
131 value itself, was associated with a reduced ongoing axial elongation in highly myopic  
132 patients [17]. As a corollary, recent Mendelian research has established a bidirectional  
133 association at the genetic level between myopia and primary open-angle glaucoma  
134 mediated through IOP [18]. In a recent retrospective clinical study medically IOP-  
135 lowering reduced axial elongation in highly myopic eyes (own unpublished data).

136 Building upon these findings, we hypothesize that medically IOP-lowering may  
137 slow axial elongation by potentially three pathways related to the sclera and choroid  
138 [19]. We therefore aim to conduct a randomized controlled trial (RCT) to assess the  
139 efficacy of medical IOP-lowering in managing axial elongation in patients with  
140 progressive HM (PHM). Additionally, this study should generate data on the effects of  
141 IOP-lowering treatment on the incidence and changes in the visual field (VF), changes  
142 in the optic nerve head morphology and myopic maculopathy. The outcomes of the

1  
2  
3  
4 143 study may establish a basis for treatment recommendations for preventing axial  
5  
6 144 elongation of highly myopic eyes.

7  
8 145

9  
10 146 **Methods and Analysis**

11  
12 147 **Study design**

13  
14 148 The PHM study is an open-label, single-center RCT. The study will be conducted at  
15  
16 149 the Zhongshan Ophthalmic Center (ZOC), Sun Yat-Sen University, a tertiary  
17  
18 150 specialized hospital in Guangzhou, China. All examinations and interventions will be  
19  
20 151 carried out in the Clinical Research Center at ZOC. This study does not permit blinding  
21  
22 152 and is therefore designed as an open-label trial. **Figure 1** summarizes the design of the  
23  
24 153 PHM study.

25  
26 154

27  
28 155 **Objective**

29  
30 156 The primary aim of this trial is to evaluate the effectiveness of medically IOP-lowering  
31  
32 157 therapy in managing axial elongation in patients with PHM over a 12-month  
33  
34 158 observation period. Additionally, the trial will assess alterations in VF, optic disc  
35  
36 159 morphology, thickness of the retinal nerve fiber layer (RNFL) and retinal ganglion cell-  
37  
38 160 inner plexiform layer (GC-IPL), and the occurrence or advancement of myopic  
39  
40 161 maculopathy.

41  
42 162

43  
44 163 **Recruitment**

45  
46 164 *Inclusion criteria*

- 47  
48 165 1. Age  $\geq 18$  years and  $\leq 65$  years.  
49  
50 166 2. Diagnosed with HM [20-21]: spherical equivalent  $\leq -6.00$  diopters or AL  $\geq 26.5$  mm.  
51  
52 167 3. Diagnosed with PHM: axial elongation  $\geq 0.05$  mm in the past 6 months or  $\geq 0.1$  mm  
53  
54 168 in the past 12 months.  
55  
56  
57  
58  
59  
60

1  
2  
3  
4 169 4. IOP:  $\geq 10$  mmHg and  $\leq 21$ mmHg on at least 2 visits using Goldmann applanation  
5  
6 170 tonometry with correction for the dependence of the IOP-reading on corneal thickness  
7  
8 171 [22].

9  
10 172 5. Best corrected visual acuity (BCVA)  $\geq 6/12$ , ability to undergo AL measurement,  
11  
12 173 fundus photography, optical coherence tomography (OCT), and complete VF  
13  
14 174 examination.

15  
16 175

17  
18 176 *Exclusion criteria*

19  
20 177 1. Patients who have been using IOP-lowering medications within the last year.

21  
22 178 2. Allergy to any kind of IOP-lowering eyedrops.

23  
24 179 3. Presence of serious fundus pathologies like proliferative diabetic retinopathy, retinal  
25  
26 180 detachment, central retinal artery occlusion, etc.

27  
28 181 4. Presence of chronic, recurrent, or severe ocular inflammatory lesions such as chronic  
29  
30 182 or recurrent uveitis.

31  
32 183 5. Significant corneal or iris lesions, severe cataract affecting fundus examination, or  
33  
34 184 patients with only one eye.

35  
36 185 6. Intraocular surgery or laser treatment within the last year, such as cataract surgery.

37  
38 186 7. With a history of previous refractive surgery or prior treatment for myopia-related  
39  
40 187 conditions (e.g., orthokeratology lens wear, low-intensity red light therapy, or low-  
41  
42 188 concentration atropine treatment).

43  
44 189 8. Presence of other serious systemic diseases (e.g., hypertension, heart disease,  
45  
46 190 diabetes, rheumatic immune system disease) that hinder long-term follow-up and eye  
47  
48 191 treatment.

49  
50 192 9. Pregnancy, lactation, or plans to have children during the follow-up period.

51  
52 193

53  
54 194 In this study, only one eye per eligible participant will be included. If both eyes meet  
55  
56 195 the inclusion criteria, the eye with a higher rate of axial elongation, a worse mean  
57  
58 196 perimetric deviation (MD) value, and a worse BCVA will be selected.

1  
2  
3  
4 1975 198 **Randomisation and blinding**

6  
7  
8 199 In this trial, randomisation will be employed to mitigate distribution bias. After  
9  
10 200 confirming all inclusion and exclusion criteria and obtaining signed written informed  
11  
12 201 consent forms, qualified individuals within each block, with a block size of 4, will be  
13  
14 202 assigned in an even (1:1) manner to either the intervention group or the control group.  
15  
16 203 The random sequence will be generated using an electronic data collection (EDC)  
17  
18 204 system to ensure unbiased allocation.

19  
20 205 In this trial, the participants and physicians will not be blinded to the intervention  
21  
22 206 assignment. The technicians conducting the examinations and interpreting the images  
23  
24 207 will be unaware of the participants' group assignments during the screening and follow-  
25  
26 208 up stages. The researchers analyzing the data will also be unaware of the information  
27  
28 209 regarding randomisation.

29  
30 21031  
32 211 **Interventions**33  
34 21235  
36 213 *Intervention group*

37  
38 214 Participants assigned to the intervention group will receive medical IOP-lowering  
39  
40 215 therapy for a duration of 12 months or until they reach the endpoint. Only the study  
41  
42 216 eye will receive medication in the enrolled participants. The preferred medication for  
43  
44 217 reducing IOP is Xalacom<sup>®</sup> eye drop (Pfizer Inc., New York, NY, USA), a fixed  
45  
46 218 latanoprost and timolol combination.

47  
48 219 The treatment protocol will involve the instillation of a single drop of  
49  
50 220 prostaglandin ophthalmic solution in the study eye once daily in the evening for  
51  
52 221 medications such as Xalacom. To ensure the standardisation of medication usage  
53  
54 222 among participants, subjects will be provided with medication logbooks, which will  
55  
56 223 be collected and recorded by the investigators during the study visits.

57  
58 224  
59  
60

1  
2  
3  
4 225 *Control group*

5  
6 226 Participants assigned to the control group will be followed up for 12 months or until  
7  
8 227 they reach the endpoint without medical IOP-lowering therapy.  
9

10 228

11  
12 229 **Outcome measures**

13  
14 230 *Primary outcome*

15  
16 231 The primary outcome is the change of AL at 12-month from baseline measured by  
17  
18 232 IOLMaster.  
19

20 233

21  
22 234 *Secondary outcomes*

23  
24 235 1. Incidence and progression of VF defects at 12 months from baseline based on  
25  
26 236 Humphrey 24-2 standard VF. Under the premise of reliable VF examination,  
27  
28 237 compared to the baseline, two consecutive perimetric examinations reveal the  
29  
30 238 incidence of VF defects or significant perimetric progression in at least three points at  
31  
32 239 a significance level of  $p < 0.05$ . Furthermore, two subsequent diagnostic VF  
33  
34 240 examinations conducted within one month also confirm the progression at the  
35  
36 241 locations. The time of progression is defined as the time of the initial diagnostic VF  
37  
38 242 examination [23-24].  
39

40 243 2. Changes in optic disc morphology (including thinning of RNFL and GC-IPL) at  
41  
42 244 12-month from baseline based on fundus photography and OCT [25-27].  
43

44 245 3. Incidence and progression of myopic maculopathy at 12 months from baseline based  
45  
46 246 on fundus photography and OCT. The determination of incidence and progression of  
47  
48 247 myopic maculopathy is based on the META-PM classification system [28-29].  
49

50 248

51  
52 249 **Study assessments**

53  
54 250 *Visual acuity*

55  
56 251 Visual acuity assessment will be conducted prior to any procedures that may potentially  
57  
58 252 impact vision, such as pupil dilation or VF examination. The measurement of visual  
59  
60

1  
2  
3  
4 253 acuity will be performed using an ETDRS (Early Treatment of Diabetic Retinopathy  
5  
6 254 Study) LogMAR chart (Precision Vision, Villa Park, Illinois, USA) under standard  
7  
8 255 illumination conditions at 4 meters [30]. For BCVA, a trial frame will be positioned  
9  
10 256 and adjusted on the participant's face based on auto refractometric readings and  
11  
12 257 subsequent subjective refinement.

13  
14 258

15  
16 259 *Refractometry*

17  
18 260 Following pupil dilation using 0.25% compound tropicamide (Zhuobian@; Sinqi,  
19  
20 261 China), three measurements will be taken for each eye using an auto refractometer  
21  
22 262 (KR800, TOPCON, Tokyo, Japan). The average values for spherical refractive error,  
23  
24 263 cylindrical refractive error, and astigmatic axis will be recorded for further analysis and  
25  
26 264 documentation.

27  
28 265

29  
30 266 *Slit-lamp biomicroscopy*

31  
32 267 The evaluation of the anterior segment with the pupil undilated will be performed using  
33  
34 268 a slit lamp (BQ-900, Haag Streit, Koeniz, Switzerland). After medical pupillary dilation,  
35  
36 269 a slit lamp-based grading of lens opacities is conducted and using a 90D indirect  
37  
38 270 ophthalmoscopic lens (Ocular 90D Slit Lamp Lenses, Ocular, Washington, DC, USA),  
39  
40 271 the optic disc, macula, and peripheral retina will be examined.

41  
42 272

43  
44 273 *Tonometry*

45  
46 274 IOP measurements will be performed by Goldmann applanation tonometry (AT900,  
47  
48 275 Haag Streit, Koeniz, Switzerland). Prior to enrollment, all participants will undergo  
49  
50 276 three baseline IOP readings during specific time intervals: 9 am to 10 am, 1 pm to 2  
51  
52 277 pm, and 4 pm to 5 pm. During follow-up visits, tonometry will be conducted between  
53  
54 278 9 am and 11 am. Results from three consecutive measurements will be documented  
55  
56 279 during each visit, and the mean value of these measurements will be utilized for  
57  
58 280 assessment purposes.



1  
2  
3  
4 281

5  
6 282 *AL measurement*

7  
8 283 AL measurement will be performed using the IOLMaster (IOLmaster 700, Carl Zeiss  
9  
10 284 Meditec, Jena, Germany). Results from five consecutive measurements will be  
11  
12 285 documented during each visit, and the mean value of these measurements will be  
13  
14 286 utilized for further analysis.

15  
16 287

17  
18 288 *Central corneal thickness (CCT) measurement*

19  
20 289 CCT measurement will be performed with IOLMaster (IOLmaster 700, Carl Zeiss  
21  
22 290 Meditec, Jena, Germany). Results from five consecutive measurements will be  
23  
24 291 documented during each visit, and the mean value of these measurements will be taken  
25  
26 292 for further analysis.

27  
28 293

29  
30 294 *Perimetry*

31  
32 295 The perimetric examination will be performed applying the Humphrey Field Analyzer  
33  
34 296 Mark 3 (Carl Zeiss Meditec, Dublin, CA, USA) and the Swedish Interactive Threshold  
35  
36 297 Algorithm Standard (SITA) 24-2 program. A reliable VF report is defined as having  
37  
38 298 false-positive and false-negative errors below 15%, as well as fixation losses below  
39  
40 299 20%.

41  
42 300

43  
44 301 *Fundus photography*

45  
46 302 Using fundus cameras (KOWA, Nonmyd, WX3D, Nagoya, Japan; TRC-NW400,  
47  
48 303 TOPCON, Tokyo, Japan), two fundus images centered on the optic disc will be taken  
49  
50 304 for each eye under both standardized stereoscopic and non-standardized conditions.  
51  
52 305 Additionally, a single image focused on the macula will be obtained after pupil dilation.

53  
54 306

55  
56 307 *OCT examination*

57  
58  
59  
60

1  
2  
3  
4 308 All participants will undergo a series of standardized swept-source OCT examinations  
5  
6 309 using the DRI-OCT Triton model (TOPCON, Tokyo, Japan), focusing on the optic disc  
7  
8 310 and macula. To ensure the reliability and accuracy of the results, a minimum image  
9  
10 311 quality score of 60 will be set. In addition to the swept-source OCT, a spectral domain  
11  
12 312 OCT examination will be conducted to obtain measurements of the peripapillary RNFL  
13  
14 313 and the macular GC-IPL.

15  
16 314

17  
18 315 *Pregnancy test*

19  
20 316 A urine pregnancy test will be performed for women of reproductive age during their  
21  
22 317 initial visit.

23  
24 318

25  
26 319 *Anthropometry and blood pressure*

27  
28 320 Participants' height and weight measurements will be measured using a free-standing  
29  
30 321 height rod and a calibrated scale (RGZ120, Jiangsu Wujin Weighing Apparatus Factory,  
31  
32 322 Jiangsu, China). During the baseline visit, blood pressure readings will be obtained  
33  
34 323 from the participant's left arm while they are seated and have rested for a minimum of  
35  
36 324 five minutes with the Omron M7 Blood Pressure Monitor (Matsusaka, Mie, Japan).

37  
38 325

39  
40 326 **Visit schedule**

41  
42 327 **Table 1** summarizes the visit schedule for the enrolment, interventions, and  
43  
44 328 assessments of this trial.

45  
46 329

47  
48 330 **Sample size**

49  
50 331 The sample size calculation for this study is determined based on the primary outcome  
51  
52 332 and the study hypothesis, taking into account relevant findings from previous studies.

53  
54 333 The objective of this study is to evaluate the potential of IOP-lowering therapy to reduce  
55  
56 334 axial elongation during a study period of one year growth in eyes with PHM. It is  
57  
58 335 hypothesized that the intervention group receiving IOP-lowering therapy will exhibit a  
59  
60

1  
2  
3  
4 336 70% reduction in axial elongation compared to the control group. The control group is  
5  
6 337 estimated to experience a 0.1 mm axial elongation over 12 months, while the  
7  
8 338 intervention group is expected to have a mean axial elongation of 0.03 mm. The  
9  
10 339 common standard deviation is estimated to be 0.14 mm. To achieve a statistical power  
11  
12 340 of 80% with a two-sided significance level of 0.05, a total of 64 individuals per group  
13  
14 341 is required. Accounting for an estimated 15% loss to follow-up at the 12-months mark,  
15  
16 342 the final sample size is determined to be 76 individuals per group, resulting in a total  
17  
18 343 of 152 participants. The sample size calculation was performed using PASS 16.0  
19  
20 344 software (NCSS, LLC, Kaysville, UT, USA).

21  
22 345

#### 23 24 346 **Statistical analysis**

25  
26 347 Statistical analysis will be conducted using Stata 16.0 software (StataCorp, College  
27  
28 348 Station, TX, USA). A two-sided P-value of less than 0.05 will be considered  
29  
30 349 statistically significant, and a 95% confidence interval will be used for parameter  
31  
32 350 estimation.

33  
34 351 For the intention-to-treat (ITT) analysis, missing data will be addressed using the  
35  
36 352 multiple imputation method. No simulation will be performed for missing data in the  
37  
38 353 safety evaluation. Dropout rates in the two groups will be compared using chi-squared  
39  
40 354 tests or Fisher's exact tests. Descriptive statistics will be reported as mean and standard  
41  
42 355 deviation for normally distributed continuous data, and as median and interquartile  
43  
44 356 range for non-normally distributed continuous data. Frequency and percentage will be  
45  
46 357 provided for categorical data. Baseline data, including demographic and clinical  
47  
48 358 characteristics, will be analyzed using independent samples t-tests and Wilcoxon rank-  
49  
50 359 sum tests for continuous data, and chi-squared or Fisher's exact tests for categorical  
51  
52 360 variables.

53  
54 361 The analysis of primary and secondary outcomes will follow the ITT principle,  
55  
56 362 including all participants. For the primary outcome, the difference in axial elongation  
57  
58 363 between the two groups will be analyzed using linear regression analysis. As for the  
59  
60

1  
2  
3  
4 364 secondary outcomes, a multifactor Poisson regression within a generalized linear model  
5  
6 365 will be utilized to estimate the relative risk of progression in perimetric defects and  
7  
8 366 myopic maculopathy. Additionally, the rate of thinning of the RNFL and the GC-IPL  
9  
10 367 will be assessed through log-rank tests.

11 368 Safety analysis will be performed in participants belonging to the intervention  
12  
13  
14 369 group, comparing adverse event occurrence between the two groups using the chi-  
15  
16 370 squared test or Fisher's exact test.

17  
18 371 The missing data will be handled using the Multiple Imputations method. With the  
19  
20 372 multiple imputation approach, 20 replicas of the dataset will be generated, where  
21  
22 373 missing values are imputed through chained equations. The final results will be  
23  
24 374 obtained by averaging these 20 datasets using Rubin's rules.

25  
26 375

#### 27 28 376 **Data monitoring**

29  
30 377 (1) The Data Monitoring Committee (DMC) will closely monitor the data throughout  
31  
32 378 the trial using the EDC system to ensure the reliability and integrity of the collected  
33  
34 379 data. The DMC members are independent individuals who are not affiliated with the  
35  
36 380 researchers or sponsors, ensuring an impartial assessment. There is no conflict of  
37  
38 381 interest between the researchers and sponsors, further guaranteeing the transparency  
39  
40 382 and objectivity of the data monitoring process.

41  
42 383 (2) Interim analysis: The study does not include provisions for conducting an interim  
43  
44 384 analysis.

45  
46 385

#### 47 48 386 **Data management**

49  
50 387 The collected data will be meticulously recorded and entered into the EDC system. The  
51  
52 388 EDC system is securely hosted on a password-protected network server, ensuring  
53  
54 389 digital protection. Only the principal investigators and authorized study team members  
55  
56 390 will have access to the research data. To ensure confidentiality and integrity, all source  
57  
58 391 documents will be stored in locked file cabinets with restricted access. Prior to data  
59  
60

1  
2  
3  
4 392 collection, all researchers will undergo comprehensive training. The raw data will be  
5  
6 393 monitored by an independent data and safety monitoring committee. In the event of  
7  
8 394 queries or uncertainties in the case report form, the data administrator will generate a  
9  
10 395 data queue request (DRQ) and communicate the query to the researcher through the  
11  
12 396 clinical monitoring system. The researcher is expected to provide a prompt response to  
13  
14 397 the data administrator. If necessary, data modifications, confirmations, and entries will  
15  
16 398 be made, and a new DRQ will be issued.

17  
18 399

## 400 **Drug packaging, management, dispensing and storage**

### 401 *Drug packaging*

402 The investigational drugs will be packaged in their own containers with dedicated  
403 research labels. Each medication package will consist of a single box, and each box will  
404 contain one unit of the drug. The box packaging will be made of paper and labeled with  
405 the phrase "For Clinical Research Use Only," along with a drug label indicating a  
406 unique drug identification number. The drug identification number is composed of the  
407 first two letters of the drug name followed by a four-digit Arabic numeral.

408

### 409 *Drug management*

410 The investigator will directly purchase the investigational drugs through the ZOC  
411 Research Procurement System. The drugs will be received and stored by a dedicated  
412 medication administrator in the Clinical Research Center. The investigational drugs  
413 will be managed by the designated medication administrator, who will be responsible  
414 for:

- 415 1. Storing the drugs according to the storage conditions specified in the drug  
416 instructions.
- 417 2. Recording all drug dispensing and retrieval activities.
- 418 3. Dispensing the drugs only to the participants as specified in the research protocol.

1  
2  
3  
4 419 4. Maintaining a comprehensive record of drug inventory throughout the study and  
5  
6 420 providing inventory logs.

7  
8 421 5. Maintaining a detailed catalog of the drugs, including information on received  
9  
10 422 materials, dispensing dates, and records of drugs provided to participants.

11  
12 423 6. Ensuring that the drug dispensing records match the usage and unused drugs and  
13  
14 424 providing explanations for any discrepancies. Relevant dispensing and return forms  
15  
16 425 must be signed by the medication administrator.

17  
18 426

19  
20 427 *Drug dispensing*

21  
22 428 After randomisation, the medication administrator will dispense the corresponding  
23  
24 429 investigational drugs to the participants based on the randomized assignment and  
25  
26 430 document the drug dispensing.

27  
28 431

29  
30 432 *Drug storage*

31  
32 433 Unopened medications should be stored according to the instructions provided in the  
33  
34 434 drug package insert. For drugs that require refrigeration between 2-8°C, the medication  
35  
36 435 administrator needs to monitor the temperature and humidity daily and document the  
37  
38 436 storage conditions. The research drugs should not be provided to anyone other than the  
39  
40 437 participants in the study. Access to the research drugs is limited to personnel authorized  
41  
42 438 by the principal investigator to dispense them. After opening, medications should be  
43  
44 439 stored according to the instructions provided in the drug package insert and must be  
45  
46 440 used within four weeks of opening the drug package.

47  
48 441

49  
50 442 **Safety assessments**

51  
52 443 The safety assessments included in this study are as follows:

53  
54 444 1. Medication-related safety assessment: The ocular hypotensive medications used in  
55  
56 445 this study are known to have rare occurrences of local and systemic adverse reactions,  
57  
58 446 such as ocular surface irritation, eyelid pigmentation, eyelash growth, and drug  
59  
60

1  
2  
3  
4 447 allergies. These assessments will be conducted and recorded by the investigators  
5  
6 448 during the study visits using slit lamp examination.

7  
8 449 2. High myopia-related safety assessment: This study focuses on individuals with high  
9  
10 450 myopia, and during the natural course of high myopia, retinal pathologies can occur.  
11  
12 451 The investigators will assess and record the complications associated with high myopia  
13  
14 452 based on the examination results during the study visits.  
15

16 453

#### 17 18 454 **Report and management of adverse events**

19  
20 455 An adverse event refers to any negative medical occurrence experienced by a  
21  
22 456 participant in the study, regardless of its relation to the treatment. Utmost attention will  
23  
24 457 be given to identifying potential adverse events or unfavorable findings. The primary  
25  
26 458 concern is the safety of the participant, and appropriate medical intervention will be  
27  
28 459 provided in case of an adverse event. All adverse events, whether reported voluntarily  
29  
30 460 by the participant or discovered through questioning, physical examination, or other  
31  
32 461 means by the study staff, will be promptly recorded on an online adverse event form  
33  
34 462 The Safety Supervision Committee will review each form to determine the appropriate  
35  
36 463 coding and reporting procedures.

37  
38 464 Serious adverse events, regardless of their connection to the study drug, must be  
39  
40 465 reported within 24 hours to the Institutional Review Board (IRB), the DMC, and the  
41  
42 466 Clinical Research Center. Additionally, a faxed report must be sent to the Drug  
43  
44 467 Administration's drug registration office. The original and fax confirmation forms for  
45  
46 468 serious adverse events should be retained in the research center along with the case  
47  
48 469 report form.

49  
50 470

#### 51 52 471 **Discussion**

53  
54 472 This trial is designed to evaluate the effect of intraocular pressure reduction on  
55  
56 473 progressive high myopia. Due to the limited research on the use of IOP reduction  
57  
58 474 medications in highly myopic eyes, the design of this study is based on a retrospective  
59  
60

1  
2  
3  
4 475 analysis of a large cohort of highly myopic individuals. It is found that the use of IOP  
5  
6 476 reduction medications slowed down axial elongation in approximately 70% of highly  
7  
8 477 myopic eyes. Therefore, we performed sample size calculations based on these findings.  
9

10 478

11  
12 479 **Study progress**

13  
14 480 The recruitment period of this study has started in June 2023 in ZOC. As of February  
15  
16 481 2024, we have included 73 participants.  
17

18 482

19  
20 483 **Acknowledgement:** We thank all the members of the Glaucoma Suspects with High  
21  
22 484 Myopia Study Group (GSHM) Study Group for conducting this trial. And also, we  
23  
24 485 thank all staff in clinical research center of ZOC for their effort in this study.  
25

26 486

27  
28 487 ***GSHM study group***

29  
30 488 Principal investigators:

31  
32 489 Xiulan Zhang, Yizhi Liu, Lin Lv, David Friedman, Jost B. Jonas, and Tin Aung.  
33

34 490 Members:

35  
36 491 Shida Chen, Wei Wang, Fengbin Lin, Yunhe Song, Peiyuan Wang, Kangjie Kong,  
37  
38 492 Jingwen Jiang, Fei Li, Kai Gao, Bingqian Liu, Yuhong Liu, and Meiling Chen.  
39

40 493 Steering committee:

41  
42 494 Neil M. Bressler, Ki Ho Park, Mingguang He, Kyoko Ohno-Matsui, Dennis S.C. Lam,  
43  
44 495 and Robert N. Weinreb.  
45

46 496 Data monitoring committee:

47  
48 497 Ching-Yu Cheng, Paul Healey, and Linda M. Zangwill.  
49

50 498 Safety supervision committee:

51  
52 499 Xiang Chen and Guangxian Tang.  
53

54 500 Biostatistics and data monitoring center:

55  
56 501 Ling Jin.  
57

58 502  
59  
60



1  
2  
3  
4 503 **Funding/Support:** This article was supported by the National Key R&D Program of  
5  
6 504 China (2022YFC2502800); the High-level Hospital Construction Project, Zhongshan  
7  
8 505 Ophthalmic Center, Sun Yat-sen University (303020104); the National Natural Science  
9  
10 506 Foundation of China (82070955); the Science and Technology Program of Guangzhou,  
11  
12 507 China (202201020362, 202102010209 2024A03J00515); Natural Science Foundation  
13  
14 508 of Guangdong Province (2020A1515011282). The funding organisations had no role  
15  
16 509 in the design or conduct of this article.  
17

18 510

19  
20 511 **Contributors:** XZ, FL, JBJ, XG and SC participated in the study design. JJ, TL and  
21  
22 512 FL wrote the primary protocol manuscript. XZ, FZ, DSL and JBJ revised the  
23  
24 513 manuscript. KK, PW and YS contributed to data collecting. LJ and WZ helped with  
25  
26 514 sample size calculation and were the statistical consultants. YL, JC and MC were  
27  
28 515 clinical research coordinators of the project.  
29

30 516

31  
32 517 **Competing interest:** Jost B. Jonas: European patent EP 3,271,392, JP 2021-  
33  
34 518 119187, and US 2021 0340237 A1: Agents for use in the therapeutic or  
35  
36 519 prophylactic treatment of myopia or hyperopia; European patent application  
37  
38 520 23196899.1 “EGFR Antagonists for the treatment of diseases involving unwanted  
39  
40 521 migration, proliferation, and metaplasia of retinal pigment epithelium (RPE)  
41  
42 522 cells”.  
43

44 523

45  
46 524 **Patient and public involvement:** Patients and/or the public were not involved in the  
47  
48 525 design, or conduct, or reporting, or dissemination plans of this research.  
49

50 526

51  
52 527 **Patient consent for publication:** Not applicable  
53

54 528

55  
56 529 **Protocol Version:** 5.0  
57

58 530  
59  
60

1  
2  
3  
4  
5  
6  
7  
8  
9  
10  
11  
12  
13  
14  
15  
16  
17  
18  
19  
20  
21  
22  
23  
24  
25  
26  
27  
28  
29  
30  
31  
32  
33  
34  
35  
36  
37  
38  
39  
40  
41  
42  
43  
44  
45  
46  
47  
48  
49  
50  
51  
52  
53  
54  
55  
56  
57  
58  
59  
60

**Figure 1** Diagram of the PHM study design.

531  
532  
533  
534  
535  
536  
537  
538  
539  
540  
541  
542  
543  
544  
545  
546  
547  
548  
549  
550  
551  
552  
553  
554  
555  
556  
557  
558

For peer review only

559 **References**

- 560 1. Yusufu M, Bukhari J, Yu X, et al. Challenges in eye care in the Asia-Pacific region. *Asia*  
561 *Pac J Ophthalmol (Phila)*. 2021;10(5):423-429. doi:10.1097/APO.0000000000000391.
- 562 2. Sankaridurg P, Berntsen DA, Bullimore MA, et al. IMI 2023 Digest. *Invest Ophthalmol*  
563 *Vis Sci*. 2023;64(6):7. doi:10.1167/iovs.64.6.7.
- 564 3. Holden BA, Fricke TR, Wilson DA, et al. Global prevalence of myopia and high myopia  
565 and temporal trends from 2000 through 2050. *Ophthalmology*. 2016;123:1036-1042. doi:  
566 10.1016/j.ophtha.2016.01.006.
- 567 4. Fricke TR, Jong M, Naidoo KS, et al. Global prevalence of visual impairment associated  
568 with myopic macular degeneration and temporal trends from 2000 through 2050:  
569 systematic review, meta-analysis and modelling. *Br J Ophthalmol*. 2018;102:855-862.  
570 doi: 10.1136/bjophthalmol-2017-311266.
- 571 5. Morgan IG, Jan CL. China turns to school reform to control the myopia epidemic: a  
572 narrative review. *Asia Pac J Ophthalmol (Phila)*. 2022;11:27-35. doi:  
573 10.1097/APO.0000000000000489.
- 574 6. Parolini B, Palmieri M, Finzi A, et al. Myopic traction maculopathy: a new perspective  
575 on classification and management. *Asia Pac J Ophthalmol (Phila)*. 2021;10:49-59. doi:  
576 10.1097/APO.0000000000000347.
- 577 7. Haarman AEG, Enthoven CA, Tideman JW, et al. The complications of myopia: a  
578 review and meta-analysis. *Invest Ophthalmol Vis Sci*. 2020;61:49. doi:  
579 10.1167/iovs.61.4.49.
- 580 8. Ha A, Kim CY, Shim SR, et al. Degree of myopia and glaucoma risk: a dose-response  
581 meta-analysis. *Am J Ophthalmol*. 2022;236:107-119. doi: 10.1016/j.ajo.2021.10.007.
- 582 9. Jiang J, Song Y, Kong K, et al. Optic Nerve Head Abnormalities in Nonpathologic High  
583 Myopia and the Relationship With Visual Field. *Asia-Pacific Journal of Ophthalmology*.  
584 2023;12: 460-467. doi: 10.1097/APO.0000000000000636.

- 1  
2  
3  
4 585 10. He HL, Liu YX, Chen XY, et al. Fundus Tessellated Density of Pathologic Myopia. *Asia-*  
5 586 *Pacific Journal of Ophthalmology*. 2023; 12: 604-613. doi:  
6 <https://doi.org/10.1097/APO.0000000000000642>.  
7 587  
8  
9 588 11. Yasushi I. Overview of the complications of high myopia. *Retina*. 2017;37:2347-2351.  
10 589 doi: 10.1097/IAE.0000000000001489.  
11  
12 590 12. Du R, Xie S, Igarashi-Yokoi T, et al. Continued increase of axial length and its risk  
13 591 factors in adults with high myopia. *JAMA Ophthalmol*. 2021;139(10):1096-1103.  
14 592 doi:10.1001/jamaophthalmol.2021.3303.  
15  
16 593 13. Jonas JB, Spaide RF, Ostrin LA, Logan NS, Flitcroft I, Panda-Jonas S. IMI-  
17 594 Nonpathological human ocular tissue changes with axial myopia. *Invest Ophthalmol Vis*  
18 595 *Sci*. 2023;64(6):5. doi:10.1167/iovs.64.6.5.  
19  
20 596 14. Lee MW, Lee SE, Lim HB, Kim JY. Longitudinal changes in axial length in high myopia:  
21 597 a 4-year prospective study. *Br J Ophthalmol*. 2020;104(5):600-603.  
22 598 doi:10.1136/bjophthalmol-2019-314619.  
23  
24 599 15. El-Nimri NW, Wildsoet CF. Effects of topical latanoprost on intraocular pressure and  
25 600 myopia progression in young guinea pigs. *Invest Ophthalmol Vis Sci*. 2018;59(6):2644-  
26 601 2651. doi:10.1167/iovs.17-22890.  
27  
28 602 16. Yang J, Pan M, Reinach PS, et al. Prostaglandin F2 $\alpha$  receptor modulation affects eye  
29 603 development in guinea pigs. *Basic Clin Pharmacol Toxicol*. 2018;123(3):263-270.  
30 604 doi:10.1111/bcpt.13017.  
31  
32 605 17. Igarashi-Yokoi T, Shinohara K, Fang Y, et al. Prognostic factors for axial length  
33 606 elongation and posterior staphyloma in adults with high myopia: a Japanese  
34 607 observational study. *Am J Ophthalmol*. 2021;225:76-85. doi:10.1016/j.ajo.2020.11.023.  
35  
36 608 18. Chong RS, Li H, Cheong AJY, et al. Mendelian randomization implicates bidirectional  
37 609 association between myopia and primary open-angle glaucoma or intraocular pressure.  
38 610 *Ophthalmology*. 2023;130(4):394-403. doi:10.1016/j.ophtha.2022.11.030.  
39  
40  
41  
42  
43  
44  
45  
46  
47  
48  
49  
50  
51  
52  
53  
54  
55  
56  
57  
58  
59  
60

- 1  
2  
3  
4 611 19. Wang P, Chen S, Liu Y, et al. Lowering intraocular pressure: a potential approach for  
5  
6 612 controlling high myopia progression. *Invest Ophthalmol Vis Sci.* 2021;62(14):17.  
7  
8 613 doi:10.1167/iovs.62.14.17.  
9  
10 614 20. Flitcroft DI, He M, Jonas JB, et al. IMI - Defining and classifying myopia: a proposed  
11  
12 615 set of standards for clinical and epidemiologic studies. *Invest Ophthalmol Vis Sci.*  
13  
14 616 2019;60(3):M20-M30. doi:10.1167/iovs.18-25957.  
15  
16 617 21. Wolf S, Balciuniene VJ, Laganovska G, et al. RADIANCE: a randomized controlled  
17  
18 618 study of ranibizumab in patients with choroidal neovascularization secondary to  
19  
20 619 pathologic myopia. *Ophthalmology.* 2014;121(3):682-92.e2.  
21  
22 620 doi:10.1016/j.ophtha.2013.10.023.  
23  
24 621 22. Comparison of glaucomatous progression between untreated patients with normal-  
25  
26 622 tension glaucoma and patients with therapeutically reduced intraocular pressures.  
27  
28 623 Collaborative Normal-Tension Glaucoma Study Group. *Am J Ophthalmol.*  
29  
30 624 1998;126(4):487-497. doi:10.1016/s0002-9394(98)00223-2.  
31  
32 625 23. Garway-Heath DF, Lascaratos G, Bunce C, et al. The United Kingdom Glaucoma  
33  
34 626 Treatment Study: a multicenter, randomized, placebo-controlled clinical trial: design and  
35  
36 627 methodology. *Ophthalmology.* 2013;120(1):68-76. doi:10.1016/j.ophtha.2012.07.028.  
37  
38 628 24. Garway-Heath DF, Crabb DP, Bunce C, et al. Latanoprost for open-angle glaucoma  
39  
40 629 (UKGTS): a randomised, multicentre, placebo-controlled trial. *Lancet.*  
41  
42 630 2015;385(9975):1295-1304. doi:10.1016/S0140-6736(14)62111-5.  
43  
44 631 25. Leske MC, Heijl A, Hyman L, Bengtsson B. Early Manifest Glaucoma Trial: design and  
45  
46 632 baseline data. *Ophthalmology.* 1999;106(11):2144-2153. doi:10.1016/s0161-  
47  
48 633 6420(99)90497-9.  
49  
50 634 26. Lalezary M, Medeiros FA, Weinreb RN, et al. Baseline optical coherence tomography  
51  
52 635 predicts the development of glaucomatous change in glaucoma suspects. *Am J*  
53  
54 636 *Ophthalmol.* 2006;142(4):576-582. doi:10.1016/j.ajo.2006.05.004.  
55  
56  
57  
58  
59  
60

- 1  
2  
3  
4 637 27. Keltner JL, Johnson CA, Anderson DR, et al. The association between glaucomatous  
5 638 visual fields and optic nerve head features in the Ocular Hypertension Treatment Study.  
6 639 *Ophthalmology*. 2006;113(9):1603-1612. doi:10.1016/j.ophtha.2006.05.061.  
7  
8 640 28. Ohno-Matsui K, Kawasaki R, Jonas JB, et al. International photographic classification  
9 641 and grading system for myopic maculopathy. *Am J Ophthalmol*. 2015;159(5):877-83.e7.  
10 642 doi:10.1016/j.ajo.2015.01.022.  
11  
12 643 29. Li Z, Liu R, Xiao O, et al. Progression of myopic maculopathy in highly myopic Chinese  
13 644 eyes. *Invest Ophthalmol Vis Sci*. 2019;60(4):1096-1104. doi:10.1167/iovs.18-25800.  
14  
15 645 30. Farida FM, Hassan Farahat HG, Salem MS. Refraction errors in school children.  
16 646 *Menoufia Med J*. 2018;31(1):293-298. doi:10.4103/mmj.mmj\_115\_17.  
17  
18  
19  
20  
21  
22  
23  
24 647  
25  
26 648  
27  
28 649  
29  
30 650  
31  
32 651  
33  
34 652  
35  
36 653  
37  
38 654  
39  
40 655  
41  
42 656  
43  
44 657  
45  
46 658  
47  
48 659  
49  
50 660  
51  
52 661  
53  
54 662  
55  
56 663  
57  
58 664  
59  
60

665 **Table 1** Visit schedule

| Periods                         | Screening      | Baseline visit | Follow-up visits |                |                |
|---------------------------------|----------------|----------------|------------------|----------------|----------------|
| Visit                           | V <sub>0</sub> | V <sub>1</sub> | V <sub>2</sub>   | V <sub>3</sub> | V <sub>4</sub> |
| Timepoint                       | Day -14 to -1  | Day 0          | Week 4 (±7d)     | Week 26 (±14d) | Week 52 (±28d) |
| Enrolment                       |                |                |                  |                |                |
| Eligibility screen              | x              |                |                  |                |                |
| Informed consent                | x              |                |                  |                |                |
| History information             | x              |                |                  |                |                |
| Allocation                      |                | x              |                  |                |                |
| Interventions                   |                | x              | x                | x              | x              |
| Assessments                     |                |                |                  |                |                |
| Physical examination            |                | x              |                  |                |                |
| Pregnancy test                  |                | x              |                  |                |                |
| Visual acuity                   |                | x              | x                | x              | x              |
| Refraction                      |                | x              | x                | x              | x              |
| Slit lamp biomicroscopy         |                | x              | x                | x              | x              |
| Intraocular pressure            | x              | x              | x                | x              | x              |
| Axial length                    |                | x              | x                | x              | x              |
| Visual field                    |                | x              | x                | x              | x              |
| Fundus photography              |                | x              | x                | x              | x              |
| Optical coherence tomography    |                | x              | x                | x              | x              |
| Central corneal thickness       |                | x              | x                | x              | x              |
| Adverse events                  | x              | x              | x                | x              | x              |
| Combination drugs               | x              | x              | x                | x              | x              |
| Drug distribution               |                | x              | x                | x              |                |
| Drug recovery and investigation |                |                | x                | x              | x              |

666

1  
2  
3  
4  
5  
6  
7  
8  
9  
10  
11  
12  
13  
14  
15  
16  
17  
18  
19  
20  
21  
22  
23  
24  
25  
26  
27  
28  
29  
30  
31  
32  
33  
34  
35  
36  
37  
38  
39  
40  
41  
42  
43  
44  
45  
46  
47  
48  
49  
50  
51  
52  
53  
54  
55  
56  
57  
58  
59  
60

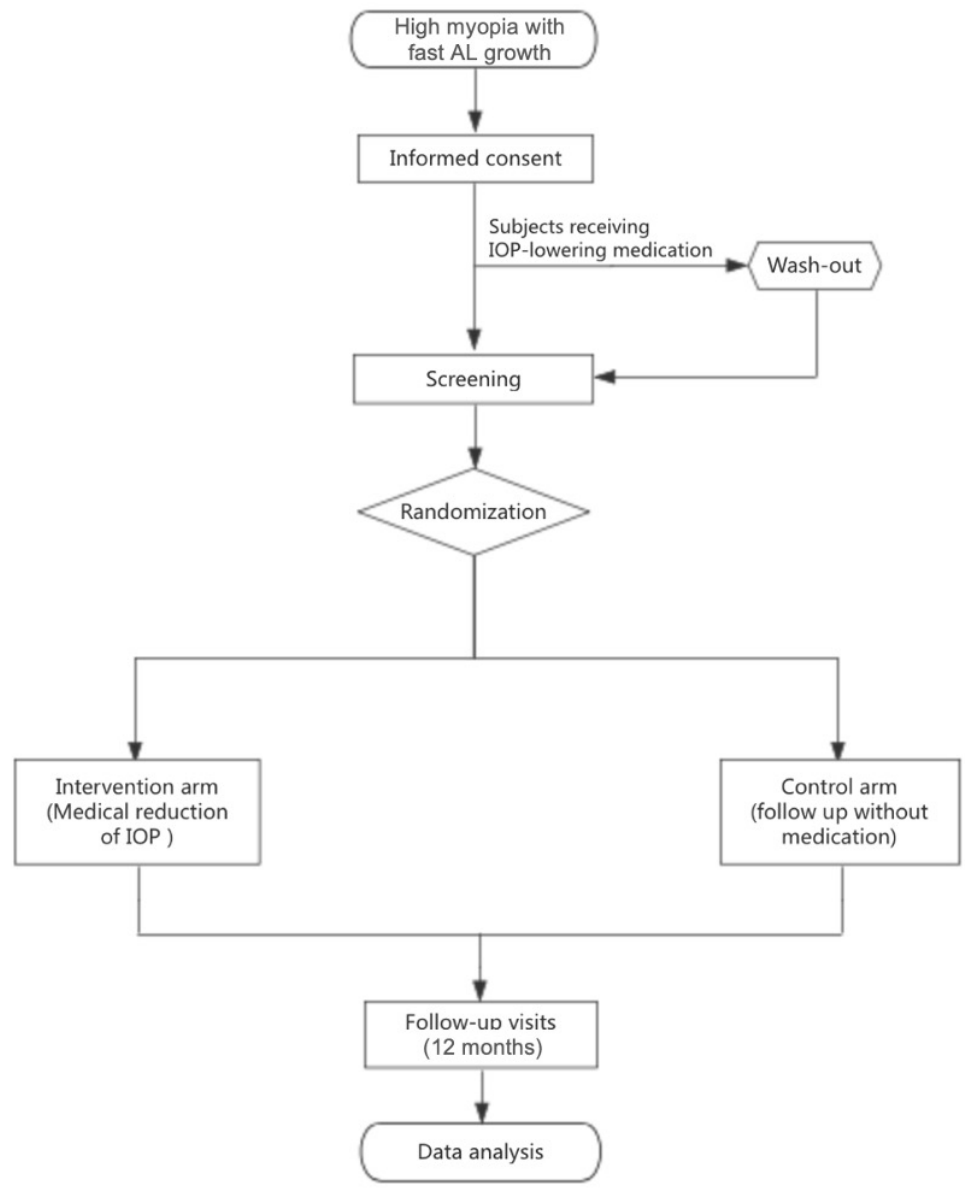

Figure 1

146x174mm (144 x 144 DPI)



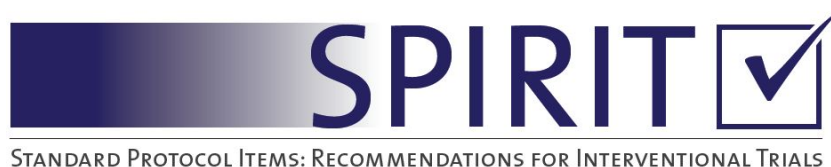

SPIRIT 2013 Checklist: Recommended items to address in a clinical trial protocol and related documents\*

| Section/item                      | Item No | Description                                                                                                                                                                                                                                                                              |
|-----------------------------------|---------|------------------------------------------------------------------------------------------------------------------------------------------------------------------------------------------------------------------------------------------------------------------------------------------|
| <b>Administrative information</b> |         |                                                                                                                                                                                                                                                                                          |
| Title                             | 1       | Descriptive title identifying the study design, population, interventions, and, if applicable, trial acronym (P1 L1-3)                                                                                                                                                                   |
| Trial registration                | 2a      | Trial identifier and registry name. If not yet registered, name of intended registry (P3 L85)                                                                                                                                                                                            |
|                                   | 2b      | All items from the World Health Organization Trial Registration Data Set                                                                                                                                                                                                                 |
| Protocol version                  | 3       | Date and version identifier (P20 L554)                                                                                                                                                                                                                                                   |
| Funding                           | 4       | Sources and types of financial, material, and other support (P19 L528-534)                                                                                                                                                                                                               |
| Roles and responsibilities        | 5a      | Names, affiliations, and roles of protocol contributors (P1 L5-21, P20 L536-540)                                                                                                                                                                                                         |
|                                   | 5b      | Name and contact information for the trial sponsor                                                                                                                                                                                                                                       |
|                                   | 5c      | Role of study sponsor and funders, if any, in study design; collection, management, analysis, and interpretation of data; writing of the report; and the decision to submit the report for publication, including whether they will have ultimate authority over any of these activities |
|                                   | 5d      | Composition, roles, and responsibilities of the coordinating centre, steering committee, endpoint adjudication committee, data management team, and other individuals or groups overseeing the trial, if applicable (see Item 21a for data monitoring committee)                         |
| <b>Introduction</b>               |         |                                                                                                                                                                                                                                                                                          |
| Background and rationale          | 6a      | Description of research question and justification for undertaking the trial, including summary of relevant studies (published and unpublished) examining benefits and harms for each intervention (P3 L60-65)                                                                           |
|                                   | 6b      | Explanation for choice of comparators                                                                                                                                                                                                                                                    |
| Objectives                        | 7       | Specific objectives or hypotheses (P3 L66-67)                                                                                                                                                                                                                                            |

1  
2 Trial design 8 Description of trial design including type of trial (eg, parallel group,  
3 crossover, factorial, single group), allocation ratio, and framework (eg,  
4 superiority, equivalence, noninferiority, exploratory) (P3 L68)  
5  
6  
7

## 8 **Methods: Participants, interventions, and outcomes**

9  
10 Study setting 9 Description of study settings (eg, community clinic, academic hospital)  
11 and list of countries where data will be collected. Reference to where  
12 list of study sites can be obtained (P3 L69-70)  
13

14 Eligibility criteria 10 Inclusion and exclusion criteria for participants. If applicable, eligibility  
15 criteria for study centres and individuals who will perform the  
16 interventions (eg, surgeons, psychotherapists) (P3 L69-70)  
17  
18

19 Interventions 11a Interventions for each group with sufficient detail to allow replication,  
20 including how and when they will be administered (P3 L70-72)  
21

22 11b Criteria for discontinuing or modifying allocated interventions for a  
23 given trial participant (eg, drug dose change in response to harms,  
24 participant request, or improving/worsening disease)  
25

26 11c Strategies to improve adherence to intervention protocols, and any  
27 procedures for monitoring adherence (eg, drug tablet return,  
28 laboratory tests)  
29  
30

31 11d Relevant concomitant care and interventions that are permitted or  
32 prohibited during the trial  
33

34 Outcomes 12 Primary, secondary, and other outcomes, including the specific  
35 measurement variable (eg, systolic blood pressure), analysis metric  
36 (eg, change from baseline, final value, time to event), method of  
37 aggregation (eg, median, proportion), and time point for each  
38 outcome. Explanation of the clinical relevance of chosen efficacy and  
39 harm outcomes is strongly recommended (P3 L73-77)  
40  
41

42 Participant 13 Time schedule of enrolment, interventions (including any run-ins and  
43 timeline washouts), assessments, and visits for participants. A schematic  
44 diagram is highly recommended (see Figure) (P25)  
45

46 Sample size 14 Estimated number of participants needed to achieve study objectives  
47 and how it was determined, including clinical and statistical  
48 assumptions supporting any sample size calculations (P3 L69)  
49  
50

51 Recruitment 15 Strategies for achieving adequate participant enrolment to reach  
52 target sample size (P3 L69)  
53

## 54 **Methods: Assignment of interventions (for controlled trials)**

55 Allocation:  
56  
57  
58  
59  
60

|    |                |     |                                                                         |
|----|----------------|-----|-------------------------------------------------------------------------|
| 1  |                |     |                                                                         |
| 2  | Sequence       | 16a | Method of generating the allocation sequence (eg, computer-             |
| 3  | generation     |     | generated random numbers), and list of any factors for stratification.  |
| 4  |                |     | To reduce predictability of a random sequence, details of any planned   |
| 5  |                |     | restriction (eg, blocking) should be provided in a separate document    |
| 6  |                |     | that is unavailable to those who enrol participants or assign           |
| 7  |                |     | interventions ( <a href="#">P8 L198-209</a> )                           |
| 8  |                |     |                                                                         |
| 9  |                |     |                                                                         |
| 10 | Allocation     | 16b | Mechanism of implementing the allocation sequence (eg, central          |
| 11 | concealment    |     | telephone; sequentially numbered, opaque, sealed envelopes),            |
| 12 | mechanism      |     | describing any steps to conceal the sequence until interventions are    |
| 13 |                |     | assigned                                                                |
| 14 |                |     |                                                                         |
| 15 | Implementation | 16c | Who will generate the allocation sequence, who will enrol participants, |
| 16 |                |     | and who will assign participants to interventions                       |
| 17 |                |     |                                                                         |
| 18 | Blinding       | 17a | Who will be blinded after assignment to interventions (eg, trial        |
| 19 | (masking)      |     | participants, care providers, outcome assessors, data analysts), and    |
| 20 |                |     | how ( <a href="#">P8 L198-209</a> )                                     |
| 21 |                |     |                                                                         |
| 22 |                |     |                                                                         |
| 23 |                | 17b | If blinded, circumstances under which unblinding is permissible, and    |
| 24 |                |     | procedure for revealing a participant's allocated intervention during   |
| 25 |                |     | the trial                                                               |
| 26 |                |     |                                                                         |
| 27 |                |     |                                                                         |

### Methods: Data collection, management, and analysis

|    |                 |     |                                                                                       |
|----|-----------------|-----|---------------------------------------------------------------------------------------|
| 28 |                 |     |                                                                                       |
| 29 |                 |     |                                                                                       |
| 30 | Data collection | 18a | Plans for assessment and collection of outcome, baseline, and other                   |
| 31 | methods         |     | trial data, including any related processes to promote data quality (eg,              |
| 32 |                 |     | duplicate measurements, training of assessors) and a description of                   |
| 33 |                 |     | study instruments (eg, questionnaires, laboratory tests) along with                   |
| 34 |                 |     | their reliability and validity, if known. Reference to where data                     |
| 35 |                 |     | collection forms can be found, if not in the protocol ( <a href="#">P10-P13 L271-</a> |
| 36 |                 |     | <a href="#">346</a> )                                                                 |
| 37 |                 |     |                                                                                       |
| 38 |                 |     |                                                                                       |
| 39 |                 | 18b | Plans to promote participant retention and complete follow-up,                        |
| 40 |                 |     | including list of any outcome data to be collected for participants who               |
| 41 |                 |     | discontinue or deviate from intervention protocols                                    |
| 42 |                 |     |                                                                                       |
| 43 | Data            | 19  | Plans for data entry, coding, security, and storage, including any                    |
| 44 | management      |     | related processes to promote data quality (eg, double data entry;                     |
| 45 |                 |     | range checks for data values). Reference to where details of data                     |
| 46 |                 |     | management procedures can be found, if not in the protocol ( <a href="#">P15</a>      |
| 47 |                 |     | <a href="#">L408-240</a> )                                                            |
| 48 |                 |     |                                                                                       |
| 49 |                 |     |                                                                                       |
| 50 | Statistical     | 20a | Statistical methods for analysing primary and secondary outcomes.                     |
| 51 | methods         |     | Reference to where other details of the statistical analysis plan can be              |
| 52 |                 |     | found, if not in the protocol( <a href="#">P14 L368-396</a> )                         |
| 53 |                 |     |                                                                                       |
| 54 |                 |     |                                                                                       |
| 55 |                 | 20b | Methods for any additional analyses (eg, subgroup and adjusted                        |
| 56 |                 |     | analyses)                                                                             |
| 57 |                 |     |                                                                                       |
| 58 |                 |     |                                                                                       |
| 59 |                 |     |                                                                                       |
| 60 |                 |     |                                                                                       |

- 1  
2  
3  
4  
5  
6  
7
- 20c Definition of analysis population relating to protocol non-adherence (eg, as randomised analysis), and any statistical methods to handle missing data (eg, multiple imputation)

### 8 **Methods: Monitoring**

- 9  
10  
11  
12  
13  
14  
15  
16  
17  
18  
19  
20  
21  
22  
23  
24  
25  
26  
27  
28  
29
- Data monitoring 21a Composition of data monitoring committee (DMC); summary of its role and reporting structure; statement of whether it is independent from the sponsor and competing interests; and reference to where further details about its charter can be found, if not in the protocol. Alternatively, an explanation of why a DMC is not needed ([P15 L398-406](#))
- 21b Description of any interim analyses and stopping guidelines, including who will have access to these interim results and make the final decision to terminate the trial
- Harms 22 Plans for collecting, assessing, reporting, and managing solicited and spontaneously reported adverse events and other unintended effects of trial interventions or trial conduct ([P17 L464-474](#))
- Auditing 23 Frequency and procedures for auditing trial conduct, if any, and whether the process will be independent from investigators and the sponsor([P15 L398-406](#))

### 30 **Ethics and dissemination**

- 31  
32  
33  
34  
35  
36  
37  
38  
39  
40  
41  
42  
43  
44  
45  
46  
47  
48  
49  
50  
51  
52  
53  
54  
55  
56  
57  
58  
59  
60
- Research ethics approval 24 Plans for seeking research ethics committee/institutional review board (REC/IRB) approval([P2 L45-47](#))
- Protocol amendments 25 Plans for communicating important protocol modifications (eg, changes to eligibility criteria, outcomes, analyses) to relevant parties (eg, investigators, REC/IRBs, trial participants, trial registries, journals, regulators)
- Consent or assent 26a Who will obtain informed consent or assent from potential trial participants or authorised surrogates, and how (see Item 32)
- 26b Additional consent provisions for collection and use of participant data and biological specimens in ancillary studies, if applicable
- Confidentiality 27 How personal information about potential and enrolled participants will be collected, shared, and maintained in order to protect confidentiality before, during, and after the trial
- Declaration of interests 28 Financial and other competing interests for principal investigators for the overall trial and each study site
- Access to data 29 Statement of who will have access to the final trial dataset, and disclosure of contractual agreements that limit such access for investigators

|    |                   |     |                                                                              |
|----|-------------------|-----|------------------------------------------------------------------------------|
| 1  |                   |     |                                                                              |
| 2  | Ancillary and     | 30  | Provisions, if any, for ancillary and post-trial care, and for               |
| 3  | post-trial care   |     | compensation to those who suffer harm from trial participation               |
| 4  |                   |     |                                                                              |
| 5  | Dissemination     | 31a | Plans for investigators and sponsor to communicate trial results to          |
| 6  | policy            |     | participants, healthcare professionals, the public, and other relevant       |
| 7  |                   |     | groups (eg, via publication, reporting in results databases, or other        |
| 8  |                   |     | data sharing arrangements), including any publication restrictions(P3        |
| 9  |                   |     | <a href="#">L83-86</a> )                                                     |
| 10 |                   |     |                                                                              |
| 11 |                   | 31b | Authorship eligibility guidelines and any intended use of professional       |
| 12 |                   |     | writers                                                                      |
| 13 |                   |     |                                                                              |
| 14 |                   | 31c | Plans, if any, for granting public access to the full protocol, participant- |
| 15 |                   |     | level dataset, and statistical code                                          |
| 16 |                   |     |                                                                              |
| 17 |                   |     |                                                                              |
| 18 |                   |     |                                                                              |
| 19 | <b>Appendices</b> |     |                                                                              |
| 20 |                   |     |                                                                              |
| 21 | Informed consent  | 32  | Model consent form and other related documentation given to                  |
| 22 | materials         |     | participants and authorised surrogates(P8 <a href="#">L200</a> )             |
| 23 |                   |     |                                                                              |
| 24 | Biological        | 33  | Plans for collection, laboratory evaluation, and storage of biological       |
| 25 | specimens         |     | specimens for genetic or molecular analysis in the current trial and for     |
| 26 |                   |     | future use in ancillary studies, if applicable                               |
| 27 |                   |     |                                                                              |

---

\*It is strongly recommended that this checklist be read in conjunction with the SPIRIT 2013 Explanation & Elaboration for important clarification on the items. Amendments to the protocol should be tracked and dated. The SPIRIT checklist is copyrighted by the SPIRIT Group under the Creative Commons "[Attribution-NonCommercial-NoDerivs 3.0 Unported](#)" license.

# BMJ Open

## Effect of Intraocular Pressure Reduction on Progressive High Myopia (PHM study): Study Protocol of a Randomized Controlled Trial

|                                 |                                                                                                                                                                                                                                                                                                                                                                                                                                                                                                                                                                                                                                                                                                                                                                                                                                                                                                                                                                                                                                                                                                                                                                                                                                                                                                                                                                                                                                                                                                                                                                                                                                                                                                                                                                                                                                                                                                                                                                                                    |
|---------------------------------|----------------------------------------------------------------------------------------------------------------------------------------------------------------------------------------------------------------------------------------------------------------------------------------------------------------------------------------------------------------------------------------------------------------------------------------------------------------------------------------------------------------------------------------------------------------------------------------------------------------------------------------------------------------------------------------------------------------------------------------------------------------------------------------------------------------------------------------------------------------------------------------------------------------------------------------------------------------------------------------------------------------------------------------------------------------------------------------------------------------------------------------------------------------------------------------------------------------------------------------------------------------------------------------------------------------------------------------------------------------------------------------------------------------------------------------------------------------------------------------------------------------------------------------------------------------------------------------------------------------------------------------------------------------------------------------------------------------------------------------------------------------------------------------------------------------------------------------------------------------------------------------------------------------------------------------------------------------------------------------------------|
| Journal:                        | <i>BMJ Open</i>                                                                                                                                                                                                                                                                                                                                                                                                                                                                                                                                                                                                                                                                                                                                                                                                                                                                                                                                                                                                                                                                                                                                                                                                                                                                                                                                                                                                                                                                                                                                                                                                                                                                                                                                                                                                                                                                                                                                                                                    |
| Manuscript ID                   | bmjopen-2024-084068.R2                                                                                                                                                                                                                                                                                                                                                                                                                                                                                                                                                                                                                                                                                                                                                                                                                                                                                                                                                                                                                                                                                                                                                                                                                                                                                                                                                                                                                                                                                                                                                                                                                                                                                                                                                                                                                                                                                                                                                                             |
| Article Type:                   | Protocol                                                                                                                                                                                                                                                                                                                                                                                                                                                                                                                                                                                                                                                                                                                                                                                                                                                                                                                                                                                                                                                                                                                                                                                                                                                                                                                                                                                                                                                                                                                                                                                                                                                                                                                                                                                                                                                                                                                                                                                           |
| Date Submitted by the Author:   | 11-Apr-2024                                                                                                                                                                                                                                                                                                                                                                                                                                                                                                                                                                                                                                                                                                                                                                                                                                                                                                                                                                                                                                                                                                                                                                                                                                                                                                                                                                                                                                                                                                                                                                                                                                                                                                                                                                                                                                                                                                                                                                                        |
| Complete List of Authors:       | Jiang, Jingwen; Sun Yat-Sen University Zhongshan Ophthalmic Center State Key Laboratory of Ophthalmology, Clinical research center<br>Lin, Tingting; Sun Yat-Sen University Zhongshan Ophthalmic Center State Key Laboratory of Ophthalmology, Clinical research center; Daqing Oilfield General Hospital<br>Lin, Fengbin; Sun Yat-Sen University Zhongshan Ophthalmic Center State Key Laboratory of Ophthalmology<br>Kong, Kangjie; Sun Yat-Sen University Zhongshan Ophthalmic Center State Key Laboratory of Ophthalmology, Clinical research center<br>Wang, Peiyuan; Sun Yat-Sen University Zhongshan Ophthalmic Center State Key Laboratory of Ophthalmology, Clinical research center<br>Song, Yunhe; Sun Yat-Sen University Zhongshan Ophthalmic Center State Key Laboratory of Ophthalmology<br>Zhou, Fengqi; Mayo Clinic College of Medicine and Science<br>Wang, Zhenyu; Sun Yat-Sen University Zhongshan Ophthalmic Center State Key Laboratory of Ophthalmology<br>Jin, Ling; Sun Yat-Sen University Zhongshan Ophthalmic Center State Key Laboratory of Ophthalmology, Clinical research center<br>Liu, Yuhong; Sun Yat-Sen University Zhongshan Ophthalmic Center State Key Laboratory of Ophthalmology, Clinical research center<br>Gao, Xinbo; Sun Yat-Sen University Zhongshan Ophthalmic Center State Key Laboratory of Ophthalmology<br>Chen, Jinmei; Sun Yat-Sen University Zhongshan Ophthalmic Center State Key Laboratory of Ophthalmology, Clinical research center<br>Chen, Meiling; Sun Yat-Sen University Zhongshan Ophthalmic Center State Key Laboratory of Ophthalmology<br>Lam, Dennis SC; The Chinese University of Hong Kong<br>Jonas, Jost; Heidelberg University, Ophthalmology; Institute of Molecular and Clinical Ophthalmology Basel,<br>Chen, Shida; Sun Yat-Sen University Zhongshan Ophthalmic Center State Key Laboratory of Ophthalmology<br>Zhang, Xiulan; Sun Yat-Sen University Zhongshan Ophthalmic Center State Key Laboratory of Ophthalmology |
| <b>Primary Subject Heading</b>: | Ophthalmology                                                                                                                                                                                                                                                                                                                                                                                                                                                                                                                                                                                                                                                                                                                                                                                                                                                                                                                                                                                                                                                                                                                                                                                                                                                                                                                                                                                                                                                                                                                                                                                                                                                                                                                                                                                                                                                                                                                                                                                      |
| Secondary Subject Heading:      | Ophthalmology                                                                                                                                                                                                                                                                                                                                                                                                                                                                                                                                                                                                                                                                                                                                                                                                                                                                                                                                                                                                                                                                                                                                                                                                                                                                                                                                                                                                                                                                                                                                                                                                                                                                                                                                                                                                                                                                                                                                                                                      |

1  
2  
3  
4  
5  
6  
7  
8  
9  
10  
11  
12  
13  
14  
15  
16  
17  
18  
19  
20  
21  
22  
23  
24  
25  
26  
27  
28  
29  
30  
31  
32  
33  
34  
35  
36  
37  
38  
39  
40  
41  
42  
43  
44  
45  
46  
47  
48  
49  
50  
51  
52  
53  
54  
55  
56  
57  
58  
59  
60

|           |                                                                      |
|-----------|----------------------------------------------------------------------|
| Keywords: | Randomized Controlled Trial, OPHTHALMOLOGY, Glaucoma < OPHTHALMOLOGY |
|           |                                                                      |

SCHOLARONE™  
Manuscripts

1  
2  
3  
4 1 **Effect of Intraocular Pressure Reduction on Progressive High**  
5 **Myopia (PHM study): Study Protocol of a Randomized**  
6 **Controlled Trial**  
7  
8  
9  
10 4

11  
12 5 Jingwen Jiang, MD<sup>1, \*</sup>, Tingting Lin, MD<sup>1, \*</sup>, Fengbin Lin, MD, PhD<sup>1</sup>, Kangjie  
13 Kong, MD<sup>1</sup>, Peiyuan Wang, MD, PhD<sup>1</sup>, Yunhe Song, MD, PhD<sup>1</sup>, Fengqi Zhou,  
14 OD<sup>2</sup>, Zhenyu Wang, MSc<sup>1</sup>, Ling Jin, MSc<sup>1</sup>, Yuhong Liu, MSc<sup>1</sup>, Xinbo Gao, MD,  
15 PhD<sup>1</sup>, Jinmei Chen, MBBS<sup>1</sup>, Meiling Chen, MBBS<sup>1</sup>, Dennis SC Lam, MD<sup>3</sup>, Jost  
16 B. Jonas, MD<sup>4,5</sup>, Shida Chen, MD, PhD<sup>1, †</sup>, Xiulan Zhang, MD, PhD<sup>1, †</sup>, for the  
17 Glaucoma Suspects with High Myopia Study Group  
18  
19  
20  
21  
22  
23  
24  
25

26 12 <sup>1</sup>State Key Laboratory of Ophthalmology, Zhongshan Ophthalmic Center, Sun  
27 Yat-sen University, Guangdong Provincial Key Laboratory of Ophthalmology and  
28 Visual Science, Guangdong Provincial Clinical Research Center for Ocular  
29 Diseases, Guangzhou 510623, China.  
30  
31  
32  
33

34 16 <sup>2</sup>Mayo Clinic College of Medicine, Rochester, MN 55902, USA.  
35

36 17 <sup>3</sup>The International Eye Research Institute, the Chinese University of Hong Kong  
37 (Shenzhen), Shenzhen, China.  
38  
39

40 19 <sup>4</sup>Department of Ophthalmology, Medical Faculty Mannheim, Heidelberg  
41 University, Mannheim, Germany.  
42  
43

44 21 <sup>5</sup>Institute of Molecular and Clinical Ophthalmology, Basel, Switzerland.  
45  
46  
47  
48

49 23 \* Jingwen Jiang and Tingting Lin contributed equally.

50 24 Tingting Lin is a visiting doctor at Zhongshan Ophthalmic Center.  
51  
52  
53

54 26 **†Corresponding Author**

55 27 Xiulan Zhang, MD, PhD

56 28 State Key Laboratory of Ophthalmology, Zhongshan Ophthalmic Center, Sun Yat-  
57 Sen University, No.7 Jinsui Road, Guangzhou 510060, China.  
58  
59  
60



1  
2  
3 30 Phone number:+86 135 7016 6308

4  
5 31 Email: zhangxl2@mail.sysu.edu.cn

6  
7 32

8  
9 33 Shida Chen, MD, PhD

10 34 State Key Laboratory of Ophthalmology, Zhongshan Ophthalmic Center, Sun Yat-  
11 Sen University, No.7 Jinsui Road, Guangzhou 510060, China.

12 35  
13 36 Email: chenshd3@mail.sysu.edu.cn

14  
15 37

16  
17  
18 38 **Competing Interest Statement and Financial Disclosure:**

19  
20 39 Jost B. Jonas: European patent EP 3,271,392, JP 2021-119187, and US 2021  
21 0340237 A1: Agents for use in the therapeutic or prophylactic treatment of myopia  
22 or hyperopia; European patent application 23196899.1 “EGFR Antagonists for the  
23 treatment of diseases involving unwanted migration, proliferation, and metaplasia  
24 of retinal pigment epithelium (RPE) cells”.

25  
26 44

27 45 **Ethics Statement:** The study was approved by the ethical committee of the  
28 Zhongshan Ophthalmic Center and adhered to the tenets of the Declaration of  
29 Helsinki. Written informed consent was obtained from all subjects.

30  
31 48

32 49 **Key Words:** High myopia, Axial length, Intraocular pressure, Randomized  
33 controlled trial

34  
35 51

36  
37 52

38  
39 53

40  
41 54

42  
43 55

44  
45 56

46  
47 57

48  
49 58

1  
2  
3  
4 59 **ABSTRACT**

5  
6 60 **Background** In adult patients with high myopia (HM), progressive axial elongation  
7  
8 61 poses a significant risk for the development of subsequent ocular complications that  
9  
10 62 may lead to visual impairment. Effective strategies to reduce or prevent further axial  
11  
12 63 elongation in highly myopic adult patients have not been available so far. Recent studies  
13  
14 64 suggested that medically lowering intraocular pressure (IOP) may reduce axial  
15  
16 65 elongation.

17  
18 66 **Objective** This clinical randomized controlled trial (RCT) aims to evaluate the efficacy  
19  
20 67 of medical IOP reduction in adult patients with progressive HM (PHM).

21  
22 68 **Trial Design** Single-center, open-label, prospective RCT.

23  
24 69 **Methods** This RCT will recruit 152 participants with PHM at the Zhongshan  
25  
26 70 Ophthalmic Center (ZOC). Randomized in a ratio of 1:1, participants will receive IOP-  
27  
28 71 lowering eyedrops (intervention group) or will be followed without treatment (control  
29  
30 72 group) for 12 months. Follow-up visits will be conducted at 1, 6, and 12 months after  
31  
32 73 baseline. Only one eye per eligible participant will be included for analysis. The  
33  
34 74 primary outcome is the change in axial length (AL) within the study period of 12  
35  
36 75 months. Secondary outcomes include the incidence and progression of visual field (VF)  
37  
38 76 defects, changes in optic disc morphology and incidence and progression of myopic  
39  
40 77 maculopathy. Difference in AL changes between the two groups will be analyzed using  
41  
42 78 linear regression analysis. For the secondary outcomes, a multifactor Poisson  
43  
44 79 regression within a generalized linear model will be utilized to estimate the relative risk  
45  
46 80 of progression in VF defects and myopic maculopathy, and the rate of thinning in retinal  
47  
48 81 nerve fiber layer and ganglion cell-inner plexiform will be assessed through Kaplan-  
49  
50 82 Meier curves and log-rank tests.

51  
52 83 **Ethics and dissemination** Full ethics approval for this trial has been obtained from the  
53  
54 84 Ethics Committee of ZOC, Sun Yat-sen University, China (ID: 2023KYPJ110). Results  
55  
56 85 of this trial will be disseminated through peer-reviewed journals and conference  
57  
58 86 presentations.

1  
2  
3  
4 87 **Trial registration number** NCT05850936 *clinicaltrials.gov*

5  
6 88

7  
8 89 **Strengths and limitations of this study**

9  
10 90 1. Prospective, interventional, randomized controlled trial to evaluate the effect of  
11  
12 91 intraocular pressure-lowering medications for controlling axial elongation in adult  
13  
14 92 patients.

15  
16 93 2. Designing and performing this randomized controlled trial based on an on-going  
17  
18 94 large-scale highly myopic cohort.

19  
20 95 3. Study does not include a placebo group and blinding is not applied.

21  
22 96 4. Participants are recruited from a single center.

23  
24 97

25  
26 98

27  
28 99

29  
30 100

31  
32 101

33  
34 102

35  
36 103

37  
38 104

39  
40 105

41  
42 106

43  
44 107

45  
46 108

47  
48 109

49  
50 110

51  
52 111

53  
54 112

55  
56 113

57  
58 114

59  
60

## 115 **Introduction**

116 High myopia (HM) is an important global public health issue [1-2], with prevalence  
117 estimates of approximately 163 million individuals (2.7% of the world population)  
118 affected in 2000, and of approximately 938 million (9.8% of the world population)  
119 people estimated to be affected in 2050 [3-5]. High myopia-related complications, such  
120 as optic neuropathy, myopic maculopathy and retinal detachment, can lead to  
121 irreversible visual impairment [6-11].

122 Recent clinical studies have revealed that highly myopic eyes in adult patients can  
123 undergo further axial elongation with a rate up 0.1mm/year [12]. Axial elongation in  
124 highly myopic eyes is a major risk for progression of myopic macular degeneration and  
125 potentially of high myopia-associated optic neuropathy and subsequent vision  
126 impairment [13-14]. Effective strategies to reduce or stop further axial elongation in  
127 highly myopic eyes are warranted.

128 Recent experimental studies have suggested that medical reduction of intraocular  
129 pressure (IOP) could be protective against axial elongation in guinea pigs [15-16]. In a  
130 clinical observational study, application of IOP-lowering medication, but not the IOP-  
131 value itself, was associated with a reduced ongoing axial elongation in highly myopic  
132 patients [17]. As a corollary, recent Mendelian research has established a bidirectional  
133 association at the genetic level between myopia and primary open-angle glaucoma  
134 mediated through IOP [18]. In a recent retrospective clinical study medically IOP-  
135 lowering reduced axial elongation in highly myopic eyes (own unpublished data).

136 Building upon these findings, we hypothesize that medically IOP-lowering may  
137 slow axial elongation by potentially three pathways related to the sclera and choroid  
138 [19]. We therefore aim to conduct a randomized controlled trial (RCT) to assess the  
139 efficacy of medical IOP-lowering in managing axial elongation in patients with  
140 progressive HM (PHM). Additionally, this study should generate data on the effects of  
141 IOP-lowering treatment on the incidence and changes in the visual field (VF), changes  
142 in the optic nerve head morphology and myopic maculopathy. The outcomes of the

1  
2  
3  
4 143 study may establish a basis for treatment recommendations for preventing axial  
5  
6 144 elongation of highly myopic eyes.

7  
8 145

9  
10 146 **Methods and Analysis**

11  
12 147 **Study design**

13  
14 148 The PHM study is an open-label, single-center RCT. The study will be conducted at  
15  
16 149 the Zhongshan Ophthalmic Center (ZOC), Sun Yat-Sen University, a tertiary  
17  
18 150 specialized hospital in Guangzhou, China. All examinations and interventions will be  
19  
20 151 carried out in the Clinical Research Center at ZOC. This study does not permit blinding  
21  
22 152 and is therefore designed as an open-label trial. **Figure 1** summarizes the design of the  
23  
24 153 PHM study.

25  
26 154

27  
28 155 **Objective**

29  
30 156 The primary aim of this trial is to evaluate the effectiveness of medically IOP-lowering  
31  
32 157 therapy in managing axial elongation in patients with PHM over a 12-month  
33  
34 158 observation period. Additionally, the trial will assess alterations in VF, optic disc  
35  
36 159 morphology, thickness of the retinal nerve fiber layer (RNFL) and retinal ganglion cell-  
37  
38 160 inner plexiform layer (GC-IPL), and the occurrence or advancement of myopic  
39  
40 161 maculopathy.

41  
42 162

43  
44 163 **Recruitment**

45  
46 164 *Inclusion criteria*

- 47  
48 165 1. Age  $\geq 18$  years and  $\leq 65$  years.  
49  
50 166 2. Diagnosed with HM [20-21]: spherical equivalent  $\leq -6.00$  diopters or AL  $\geq 26.5$  mm.  
51  
52 167 3. Diagnosed with PHM: axial elongation  $\geq 0.05$  mm in the past 6 months or  $\geq 0.1$  mm  
53  
54 168 in the past 12 months.  
55  
56  
57  
58  
59  
60

1  
2  
3  
4 169 4. IOP:  $\geq 10$  mmHg and  $\leq 21$  mmHg on at least 2 visits using Goldmann applanation  
5  
6 170 tonometry with correction for the dependence of the IOP-reading on corneal thickness  
7  
8 171 [22].

9  
10 172 5. Best corrected visual acuity (BCVA)  $\geq 6/12$ , ability to undergo AL measurement,  
11  
12 173 fundus photography, optical coherence tomography (OCT), and complete VF  
13  
14 174 examination.

15  
16 175

17  
18 176 *Exclusion criteria*

19  
20 177 1. Patients who have been using IOP-lowering medications within the last year.

21  
22 178 2. Allergy to any kind of IOP-lowering eyedrops.

23  
24 179 3. Presence of serious fundus pathologies like proliferative diabetic retinopathy, retinal  
25  
26 180 detachment, central retinal artery occlusion, etc.

27  
28 181 4. Presence of chronic, recurrent, or severe ocular inflammatory lesions such as chronic  
29  
30 182 or recurrent uveitis.

31  
32 183 5. Significant corneal or iris lesions, severe cataract affecting fundus examination, or  
33  
34 184 patients with only one eye.

35  
36 185 6. Intraocular surgery or laser treatment within the last year, such as cataract surgery.

37  
38 186 7. With a history of previous refractive surgery or prior treatment for myopia-related  
39  
40 187 conditions (e.g., orthokeratology lens wear, low-intensity red light therapy, or low-  
41  
42 188 concentration atropine treatment).

43  
44 189 8. Presence of other serious systemic diseases (e.g., hypertension, heart disease,  
45  
46 190 diabetes, rheumatic immune system disease) that hinder long-term follow-up and eye  
47  
48 191 treatment.

49  
50 192 9. Pregnancy, lactation, or plans to have children during the follow-up period.

51  
52 193

53  
54 194 In this study, only one eye per eligible participant will be included. If both eyes meet  
55  
56 195 the inclusion criteria, the eye with a higher rate of axial elongation, a worse mean  
57  
58 196 perimetric deviation (MD) value, and a worse BCVA will be selected.

1  
2  
3  
4 1975 198 **Randomisation and blinding**

6  
7  
8 199 In this trial, randomisation will be employed to mitigate distribution bias. After  
9  
10 200 confirming all inclusion and exclusion criteria and obtaining signed written informed  
11  
12 201 consent forms (see supplemental material), qualified individuals within each block,  
13  
14 202 with a block size of 4, will be assigned in an even (1:1) manner to either the intervention  
15  
16 203 group or the control group. The random sequence will be generated using an electronic  
17  
18 204 data collection (EDC) system to ensure unbiased allocation.

19  
20 205 In this trial, the participants and physicians will not be blinded to the intervention  
21  
22 206 assignment. The technicians conducting the examinations and interpreting the images  
23  
24 207 will be unaware of the participants' group assignments during the screening and follow-  
25  
26 208 up stages. The researchers analyzing the data will also be unaware of the information  
27  
28 209 regarding randomisation.

29  
30 21031  
32 211 **Interventions**33  
34 21235  
36 213 *Intervention group*

37  
38 214 Participants assigned to the intervention group will receive medical IOP-lowering  
39  
40 215 therapy for a duration of 12 months or until they reach the endpoint. Only the study  
41  
42 216 eye will receive medication in the enrolled participants. The preferred medication for  
43  
44 217 reducing IOP is Xalacom<sup>®</sup> eye drop (Pfizer Inc., New York, NY, USA), a fixed  
45  
46 218 latanoprost and timolol combination.

47  
48 219 The treatment protocol will involve the instillation of a single drop of  
49  
50 220 prostaglandin ophthalmic solution in the study eye once daily in the evening for  
51  
52 221 medications such as Xalacom. To ensure the standardisation of medication usage  
53  
54 222 among participants, subjects will be provided with medication logbooks, which will  
55  
56 223 be collected and recorded by the investigators during the study visits.

57  
58 224  
59  
60

1  
2  
3  
4 225 *Control group*

5  
6 226 Participants assigned to the control group will be followed up for 12 months or until  
7  
8 227 they reach the endpoint without medical IOP-lowering therapy.  
9

10 228

11  
12 229 **Outcome measures**

13  
14 230 *Primary outcome*

15  
16 231 The primary outcome is the change of AL at 12-month from baseline measured by  
17  
18 232 IOLMaster.  
19

20 233

21  
22 234 *Secondary outcomes*

23  
24 235 1. Incidence and progression of VF defects at 12 months from baseline based on  
25  
26 236 Humphrey 24-2 standard VF. Under the premise of reliable VF examination,  
27  
28 237 compared to the baseline, two consecutive perimetric examinations reveal the  
29  
30 238 incidence of VF defects or significant perimetric progression in at least three points at  
31  
32 239 a significance level of  $p < 0.05$ . Furthermore, two subsequent diagnostic VF  
33  
34 240 examinations conducted within one month also confirm the progression at the  
35  
36 241 locations. The time of progression is defined as the time of the initial diagnostic VF  
37  
38 242 examination [23-24].  
39

40 243 2. Changes in optic disc morphology (including thinning of RNFL and GC-IPL) at  
41  
42 244 12-month from baseline based on fundus photography and OCT [25-27].  
43

44 245 3. Incidence and progression of myopic maculopathy at 12 months from baseline based  
45  
46 246 on fundus photography and OCT. The determination of incidence and progression of  
47  
48 247 myopic maculopathy is based on the META-PM classification system [28-29].  
49

50 248

51  
52 249 **Study assessments**

53  
54 250 *Visual acuity*

55  
56 251 Visual acuity assessment will be conducted prior to any procedures that may potentially  
57  
58 252 impact vision, such as pupil dilation or VF examination. The measurement of visual  
59  
60



1  
2  
3  
4 253 acuity will be performed using an ETDRS (Early Treatment of Diabetic Retinopathy  
5  
6 254 Study) LogMAR chart (Precision Vision, Villa Park, Illinois, USA) under standard  
7  
8 255 illumination conditions at 4 meters [30]. For BCVA, a trial frame will be positioned  
9  
10 256 and adjusted on the participant's face based on auto refractometric readings and  
11  
12 257 subsequent subjective refinement.

13  
14 258

15  
16 259 *Refractometry*

17  
18 260 Following pupil dilation using 0.25% compound tropicamide (Zhuobian®; Sinqi,  
19  
20 261 China), three measurements will be taken for each eye using an auto refractometer  
21  
22 262 (KR800, TOPCON, Tokyo, Japan). The average values for spherical refractive error,  
23  
24 263 cylindrical refractive error, and astigmatic axis will be recorded for further analysis and  
25  
26 264 documentation.

27  
28 265

29  
30 266 *Slit-lamp biomicroscopy*

31  
32 267 The evaluation of the anterior segment with the pupil undilated will be performed using  
33  
34 268 a slit lamp (BQ-900, Haag Streit, Koeniz, Switzerland). After medical pupillary dilation,  
35  
36 269 a slit lamp-based grading of lens opacities is conducted and using a 90D indirect  
37  
38 270 ophthalmoscopic lens (Ocular 90D Slit Lamp Lenses, Ocular, Washington, DC, USA),  
39  
40 271 the optic disc, macula, and peripheral retina will be examined.

41  
42 272

43  
44 273 *Tonometry*

45  
46 274 IOP measurements will be performed by Goldmann applanation tonometry (AT900,  
47  
48 275 Haag Streit, Koeniz, Switzerland). Prior to enrollment, all participants will undergo  
49  
50 276 three baseline IOP readings during specific time intervals: 9 am to 10 am, 1 pm to 2  
51  
52 277 pm, and 4 pm to 5 pm. During follow-up visits, tonometry will be conducted between  
53  
54 278 9 am and 11 am. Results from three consecutive measurements will be documented  
55  
56 279 during each visit, and the mean value of these measurements will be utilized for  
57  
58 280 assessment purposes.

1  
2  
3  
4 281

5  
6 282 *AL measurement*

7  
8 283 AL measurement will be performed using the IOLMaster (IOLmaster 700, Carl Zeiss  
9  
10 284 Meditec, Jena, Germany). Results from five consecutive measurements will be  
11  
12 285 documented during each visit, and the mean value of these measurements will be  
13  
14 286 utilized for further analysis.

15  
16 287

17  
18 288 *Central corneal thickness (CCT) measurement*

19  
20 289 CCT measurement will be performed with IOLMaster (IOLmaster 700, Carl Zeiss  
21  
22 290 Meditec, Jena, Germany). Results from five consecutive measurements will be  
23  
24 291 documented during each visit, and the mean value of these measurements will be taken  
25  
26 292 for further analysis.

27  
28 293

29  
30 294 *Perimetry*

31  
32 295 The perimetric examination will be performed applying the Humphrey Field Analyzer  
33  
34 296 Mark 3 (Carl Zeiss Meditec, Dublin, CA, USA) and the Swedish Interactive Threshold  
35  
36 297 Algorithm Standard (SITA) 24-2 program. A reliable VF report is defined as having  
37  
38 298 false-positive and false-negative errors below 15%, as well as fixation losses below  
39  
40 299 20%.

41  
42 300

43  
44 301 *Fundus photography*

45  
46 302 Using fundus cameras (KOWA, Nonmyd, WX3D, Nagoya, Japan; TRC-NW400,  
47  
48 303 TOPCON, Tokyo, Japan), two fundus images centered on the optic disc will be taken  
49  
50 304 for each eye under both standardized stereoscopic and non-standardized conditions.  
51  
52 305 Additionally, a single image focused on the macula will be obtained after pupil dilation.

53  
54 306

55  
56 307 *OCT examination*

57  
58  
59  
60

1  
2  
3  
4 308 All participants will undergo a series of standardized swept-source OCT examinations  
5  
6 309 using the DRI-OCT Triton model (TOPCON, Tokyo, Japan), focusing on the optic disc  
7  
8 310 and macula. To ensure the reliability and accuracy of the results, a minimum image  
9  
10 311 quality score of 60 will be set. In addition to the swept-source OCT, a spectral domain  
11  
12 312 OCT examination will be conducted to obtain measurements of the peripapillary RNFL  
13  
14 313 and the macular GC-IPL.

15  
16 314

17  
18 315 *Pregnancy test*

19  
20 316 A urine pregnancy test will be performed for women of reproductive age during their  
21  
22 317 initial visit.

23  
24 318

25  
26 319 *Anthropometry and blood pressure*

27  
28 320 Participants' height and weight measurements will be measured using a free-standing  
29  
30 321 height rod and a calibrated scale (RGZ120, Jiangsu Wujin Weighing Apparatus Factory,  
31  
32 322 Jiangsu, China). During the baseline visit, blood pressure readings will be obtained  
33  
34 323 from the participant's left arm while they are seated and have rested for a minimum of  
35  
36 324 five minutes with the Omron M7 Blood Pressure Monitor (Matsusaka, Mie, Japan).

37  
38 325

39  
40 326 **Visit schedule**

41  
42 327 **Table 1** summarizes the visit schedule for the enrolment, interventions, and  
43  
44 328 assessments of this trial.

45  
46 329

47  
48 330 **Sample size**

49  
50 331 The sample size calculation for this study is determined based on the primary outcome  
51  
52 332 and the study hypothesis, taking into account relevant findings from previous studies.

53  
54 333 The objective of this study is to evaluate the potential of IOP-lowering therapy to reduce  
55  
56 334 axial elongation during a study period of one year growth in eyes with PHM. It is  
57  
58 335 hypothesized that the intervention group receiving IOP-lowering therapy will exhibit a  
59  
60

1  
2  
3  
4 336 70% reduction in axial elongation compared to the control group. The control group is  
5  
6 337 estimated to experience a 0.1 mm axial elongation over 12 months, while the  
7  
8 338 intervention group is expected to have a mean axial elongation of 0.03 mm. The  
9  
10 339 common standard deviation is estimated to be 0.14 mm. To achieve a statistical power  
11  
12 340 of 80% with a two-sided significance level of 0.05, a total of 64 individuals per group  
13  
14 341 is required. Accounting for an estimated 15% loss to follow-up at the 12-months mark,  
15  
16 342 the final sample size is determined to be 76 individuals per group, resulting in a total  
17  
18 343 of 152 participants. The sample size calculation was performed using PASS 16.0  
19  
20 344 software (NCSS, LLC, Kaysville, UT, USA).

21  
22 345

#### 23 24 346 **Statistical analysis**

25  
26 347 Statistical analysis will be conducted using Stata 16.0 software (StataCorp, College  
27  
28 348 Station, TX, USA). A two-sided P-value of less than 0.05 will be considered  
29  
30 349 statistically significant, and a 95% confidence interval will be used for parameter  
31  
32 350 estimation.

33  
34 351 For the intention-to-treat (ITT) analysis, missing data will be addressed using the  
35  
36 352 multiple imputation method. No simulation will be performed for missing data in the  
37  
38 353 safety evaluation. Dropout rates in the two groups will be compared using chi-squared  
39  
40 354 tests or Fisher's exact tests. Descriptive statistics will be reported as mean and standard  
41  
42 355 deviation for normally distributed continuous data, and as median and interquartile  
43  
44 356 range for non-normally distributed continuous data. Frequency and percentage will be  
45  
46 357 provided for categorical data. Baseline data, including demographic and clinical  
47  
48 358 characteristics, will be analyzed using independent samples t-tests and Wilcoxon rank-  
49  
50 359 sum tests for continuous data, and chi-squared or Fisher's exact tests for categorical  
51  
52 360 variables.

53  
54 361 The analysis of primary and secondary outcomes will follow the ITT principle,  
55  
56 362 including all participants. For the primary outcome, the difference in axial elongation  
57  
58 363 between the two groups will be analyzed using linear regression analysis. As for the  
59  
60

1  
2  
3  
4 364 secondary outcomes, a multifactor Poisson regression within a generalized linear model  
5  
6 365 will be utilized to estimate the relative risk of progression in perimetric defects and  
7  
8 366 myopic maculopathy. Additionally, the rate of thinning of the RNFL and the GC-IPL  
9  
10 367 will be assessed through log-rank tests.

11  
12 368 Safety analysis will be performed in participants belonging to the intervention  
13  
14 369 group, comparing adverse event occurrence between the two groups using the chi-  
15  
16 370 squared test or Fisher's exact test.

17  
18 371 The missing data will be handled using the Multiple Imputations method. With the  
19  
20 372 multiple imputation approach, 20 replicas of the dataset will be generated, where  
21  
22 373 missing values are imputed through chained equations. The final results will be  
23  
24 374 obtained by averaging these 20 datasets using Rubin's rules.

25  
26 375

#### 27 28 376 **Data monitoring**

29  
30 377 (1) The Data Monitoring Committee (DMC) will closely monitor the data throughout  
31  
32 378 the trial using the EDC system to ensure the reliability and integrity of the collected  
33  
34 379 data. The DMC members are independent individuals who are not affiliated with the  
35  
36 380 researchers or sponsors, ensuring an impartial assessment. There is no conflict of  
37  
38 381 interest between the researchers and sponsors, further guaranteeing the transparency  
39  
40 382 and objectivity of the data monitoring process.

41  
42 383 (2) Interim analysis: The study does not include provisions for conducting an interim  
43  
44 384 analysis.

45  
46 385

#### 47 48 386 **Data management**

49  
50 387 The collected data will be meticulously recorded and entered into the EDC system. The  
51  
52 388 EDC system is securely hosted on a password-protected network server, ensuring  
53  
54 389 digital protection. Only the principal investigators and authorized study team members  
55  
56 390 will have access to the research data. To ensure confidentiality and integrity, all source  
57  
58 391 documents will be stored in locked file cabinets with restricted access. Prior to data  
59  
60

1  
2  
3  
4 392 collection, all researchers will undergo comprehensive training. The raw data will be  
5  
6 393 monitored by an independent data and safety monitoring committee. In the event of  
7  
8 394 queries or uncertainties in the case report form, the data administrator will generate a  
9  
10 395 data queue request (DRQ) and communicate the query to the researcher through the  
11  
12 396 clinical monitoring system. The researcher is expected to provide a prompt response to  
13  
14 397 the data administrator. If necessary, data modifications, confirmations, and entries will  
15  
16 398 be made, and a new DRQ will be issued.

17  
18 399

## 400 **Drug packaging, management, dispensing and storage**

### 401 *Drug packaging*

402 The investigational drugs will be packaged in their own containers with dedicated  
403 research labels. Each medication package will consist of a single box, and each box will  
404 contain one unit of the drug. The box packaging will be made of paper and labeled with  
405 the phrase "For Clinical Research Use Only," along with a drug label indicating a  
406 unique drug identification number. The drug identification number is composed of the  
407 first two letters of the drug name followed by a four-digit Arabic numeral.

408

### 409 *Drug management*

410 The investigator will directly purchase the investigational drugs through the ZOC  
411 Research Procurement System. The drugs will be received and stored by a dedicated  
412 medication administrator in the Clinical Research Center. The investigational drugs  
413 will be managed by the designated medication administrator, who will be responsible  
414 for:

- 415 1. Storing the drugs according to the storage conditions specified in the drug  
416 instructions.
- 417 2. Recording all drug dispensing and retrieval activities.
- 418 3. Dispensing the drugs only to the participants as specified in the research protocol.

1  
2  
3  
4 419 4. Maintaining a comprehensive record of drug inventory throughout the study and  
5  
6 420 providing inventory logs.

7  
8 421 5. Maintaining a detailed catalog of the drugs, including information on received  
9  
10 422 materials, dispensing dates, and records of drugs provided to participants.

11  
12 423 6. Ensuring that the drug dispensing records match the usage and unused drugs and  
13  
14 424 providing explanations for any discrepancies. Relevant dispensing and return forms  
15  
16 425 must be signed by the medication administrator.

17  
18 426

19  
20 427 *Drug dispensing*

21  
22 428 After randomisation, the medication administrator will dispense the corresponding  
23  
24 429 investigational drugs to the participants based on the randomized assignment and  
25  
26 430 document the drug dispensing.

27  
28 431

29  
30 432 *Drug storage*

31  
32 433 Unopened medications should be stored according to the instructions provided in the  
33  
34 434 drug package insert. For drugs that require refrigeration between 2-8°C, the medication  
35  
36 435 administrator needs to monitor the temperature and humidity daily and document the  
37  
38 436 storage conditions. The research drugs should not be provided to anyone other than the  
39  
40 437 participants in the study. Access to the research drugs is limited to personnel authorized  
41  
42 438 by the principal investigator to dispense them. After opening, medications should be  
43  
44 439 stored according to the instructions provided in the drug package insert and must be  
45  
46 440 used within four weeks of opening the drug package.

47  
48 441

49  
50 442 **Safety assessments**

51  
52 443 The safety assessments included in this study are as follows:

53  
54 444 1. Medication-related safety assessment: The ocular hypotensive medications used in  
55  
56 445 this study are known to have rare occurrences of local and systemic adverse reactions,  
57  
58 446 such as ocular surface irritation, eyelid pigmentation, eyelash growth, and drug  
59  
60

1  
2  
3  
4 447 allergies. These assessments will be conducted and recorded by the investigators  
5  
6 448 during the study visits using slit lamp examination.

7  
8 449 2. High myopia-related safety assessment: This study focuses on individuals with high  
9  
10 450 myopia, and during the natural course of high myopia, retinal pathologies can occur.  
11  
12 451 The investigators will assess and record the complications associated with high myopia  
13  
14 452 based on the examination results during the study visits.  
15

16 453

#### 17 18 454 **Report and management of adverse events**

19  
20 455 An adverse event refers to any negative medical occurrence experienced by a  
21  
22 456 participant in the study, regardless of its relation to the treatment. Utmost attention will  
23  
24 457 be given to identifying potential adverse events or unfavorable findings. The primary  
25  
26 458 concern is the safety of the participant, and appropriate medical intervention will be  
27  
28 459 provided in case of an adverse event. All adverse events, whether reported voluntarily  
29  
30 460 by the participant or discovered through questioning, physical examination, or other  
31  
32 461 means by the study staff, will be promptly recorded on an online adverse event form  
33  
34 462 The Safety Supervision Committee will review each form to determine the appropriate  
35  
36 463 coding and reporting procedures.

37  
38 464 Serious adverse events, regardless of their connection to the study drug, must be  
39  
40 465 reported within 24 hours to the Institutional Review Board (IRB), the DMC, and the  
41  
42 466 Clinical Research Center. Additionally, a faxed report must be sent to the Drug  
43  
44 467 Administration's drug registration office. The original and fax confirmation forms for  
45  
46 468 serious adverse events should be retained in the research center along with the case  
47  
48 469 report form.

49  
50 470

#### 51 52 471 **Discussion**

53  
54 472 This trial is designed to evaluate the effect of intraocular pressure reduction on  
55  
56 473 progressive high myopia. Due to the limited research on the use of IOP reduction  
57  
58 474 medications in highly myopic eyes, the design of this study is based on a retrospective  
59  
60



1  
2  
3  
4 475 analysis of a large cohort of highly myopic individuals. It is found that the use of IOP  
5  
6 476 reduction medications slowed down axial elongation in approximately 70% of highly  
7  
8 477 myopic eyes. Therefore, we performed sample size calculations based on these findings.  
9

10 478

11  
12 479 **Study progress**

13  
14 480 The recruitment period of this study has started in June 2023 in ZOC. As of February  
15  
16 481 2024, we have included 73 participants.  
17

18 482

19  
20 483 **Acknowledgement:** We thank all the members of the Glaucoma Suspects with High  
21  
22 484 Myopia Study Group (GSHM) Study Group for conducting this trial. And also, we  
23  
24 485 thank all staff in clinical research center of ZOC for their effort in this study.  
25

26 486

27  
28 487 ***GSHM study group***

29  
30 488 Principal investigators:

31  
32 489 Xiulan Zhang, Yizhi Liu, Lin Lv, David Friedman, Jost B. Jonas, and Tin Aung.  
33

34 490 Members:

35  
36 491 Shida Chen, Wei Wang, Fengbin Lin, Yunhe Song, Peiyuan Wang, Kangjie Kong,  
37

38 492 Jingwen Jiang, Fei Li, Kai Gao, Bingqian Liu, Yuhong Liu, and Meiling Chen.  
39

40 493 Steering committee:

41  
42 494 Neil M. Bressler, Ki Ho Park, Mingguang He, Kyoko Ohno-Matsui, Dennis S.C. Lam,  
43

44 495 and Robert N. Weinreb.  
45

46 496 Data monitoring committee:

47  
48 497 Ching-Yu Cheng, Paul Healey, and Linda M. Zangwill.  
49

50 498 Safety supervision committee:

51  
52 499 Xiang Chen and Guangxian Tang.  
53

54 500 Biostatistics and data monitoring center:

55  
56 501 Ling Jin.  
57

58 502  
59  
60

1  
2  
3  
4 503 **Funding/Support:** This article was supported by the National Key R&D Program of  
5  
6 504 China (2022YFC2502800); the High-level Hospital Construction Project, Zhongshan  
7  
8 505 Ophthalmic Center, Sun Yat-sen University (303020104); the National Natural Science  
9  
10 506 Foundation of China (82070955); the Science and Technology Program of Guangzhou,  
11  
12 507 China (202201020362, 202102010209 2024A03J00515); Natural Science Foundation  
13  
14 508 of Guangdong Province (2020A1515011282). The funding organisations had no role  
15  
16 509 in the design or conduct of this article.  
17

18 510

19  
20 511 **Contributors:** XZ, FL, JBJ, XG and SC participated in the study design. JJ, TL and  
21  
22 512 FL wrote the primary protocol manuscript. XZ, FZ, DSL and JBJ revised the  
23  
24 513 manuscript. KK, PW and YS contributed to data collecting. LJ and WZ helped with  
25  
26 514 sample size calculation and were the statistical consultants. YL, JC and MC were  
27  
28 515 clinical research coordinators of the project.  
29

30 516

31  
32 517 **Competing interest:** Jost B. Jonas: European patent EP 3,271,392, JP 2021-  
33  
34 518 119187, and US 2021 0340237 A1: Agents for use in the therapeutic or  
35  
36 519 prophylactic treatment of myopia or hyperopia; European patent application  
37  
38 520 23196899.1 “EGFR Antagonists for the treatment of diseases involving unwanted  
39  
40 521 migration, proliferation, and metaplasia of retinal pigment epithelium (RPE)  
41  
42 522 cells”.  
43

44 523

45  
46 524 **Patient and public involvement:** Patients and/or the public were not involved in the  
47  
48 525 design, or conduct, or reporting, or dissemination plans of this research.  
49

50 526

51  
52 527 **Patient consent for publication:** Not applicable  
53

54 528

55  
56 529 **Protocol Version:** 5.0  
57

58 530  
59  
60

1  
2  
3  
4  
5  
6  
7  
8  
9  
10  
11  
12  
13  
14  
15  
16  
17  
18  
19  
20  
21  
22  
23  
24  
25  
26  
27  
28  
29  
30  
31  
32  
33  
34  
35  
36  
37  
38  
39  
40  
41  
42  
43  
44  
45  
46  
47  
48  
49  
50  
51  
52  
53  
54  
55  
56  
57  
58  
59  
60

**Figure 1** Diagram of the PHM study design.

531  
532  
533  
534  
535  
536  
537  
538  
539  
540  
541  
542  
543  
544  
545  
546  
547  
548  
549  
550  
551  
552  
553  
554  
555  
556  
557  
558

For peer review only

559 **References**

- 560 1. Yusufu M, Bukhari J, Yu X, et al. Challenges in eye care in the Asia-Pacific region. *Asia*  
561 *Pac J Ophthalmol (Phila)*. 2021;10(5):423-429. doi:10.1097/APO.0000000000000391.
- 562 2. Sankaridurg P, Berntsen DA, Bullimore MA, et al. IMI 2023 Digest. *Invest Ophthalmol*  
563 *Vis Sci*. 2023;64(6):7. doi:10.1167/iovs.64.6.7.
- 564 3. Holden BA, Fricke TR, Wilson DA, et al. Global prevalence of myopia and high myopia  
565 and temporal trends from 2000 through 2050. *Ophthalmology*. 2016;123:1036-1042. doi:  
566 10.1016/j.ophtha.2016.01.006.
- 567 4. Fricke TR, Jong M, Naidoo KS, et al. Global prevalence of visual impairment associated  
568 with myopic macular degeneration and temporal trends from 2000 through 2050:  
569 systematic review, meta-analysis and modelling. *Br J Ophthalmol*. 2018;102:855-862.  
570 doi: 10.1136/bjophthalmol-2017-311266.
- 571 5. Morgan IG, Jan CL. China turns to school reform to control the myopia epidemic: a  
572 narrative review. *Asia Pac J Ophthalmol (Phila)*. 2022;11:27-35. doi:  
573 10.1097/APO.0000000000000489.
- 574 6. Parolini B, Palmieri M, Finzi A, et al. Myopic traction maculopathy: a new perspective  
575 on classification and management. *Asia Pac J Ophthalmol (Phila)*. 2021;10:49-59. doi:  
576 10.1097/APO.0000000000000347.
- 577 7. Haarman AEG, Enthoven CA, Tideman JW, et al. The complications of myopia: a  
578 review and meta-analysis. *Invest Ophthalmol Vis Sci*. 2020;61:49. doi:  
579 10.1167/iovs.61.4.49.
- 580 8. Ha A, Kim CY, Shim SR, et al. Degree of myopia and glaucoma risk: a dose-response  
581 meta-analysis. *Am J Ophthalmol*. 2022;236:107-119. doi: 10.1016/j.ajo.2021.10.007.
- 582 9. Jiang J, Song Y, Kong K, et al. Optic Nerve Head Abnormalities in Nonpathologic High  
583 Myopia and the Relationship With Visual Field. *Asia-Pacific Journal of Ophthalmology*.  
584 2023;12: 460-467. doi: 10.1097/APO.0000000000000636.

- 1  
2  
3  
4 585 10. He HL, Liu YX, Chen XY, et al. Fundus Tessellated Density of Pathologic Myopia. *Asia-*  
5 586 *Pacific Journal of Ophthalmology*. 2023; 12: 604-613. doi:  
6 <https://doi.org/10.1097/APO.0000000000000642>.  
7 587  
8  
9 588 11. Yasushi I. Overview of the complications of high myopia. *Retina*. 2017;37:2347-2351.  
10 589 doi: 10.1097/IAE.0000000000001489.  
11  
12 590 12. Du R, Xie S, Igarashi-Yokoi T, et al. Continued increase of axial length and its risk  
13 591 factors in adults with high myopia. *JAMA Ophthalmol*. 2021;139(10):1096-1103.  
14 592 doi:10.1001/jamaophthalmol.2021.3303.  
15  
16 593 13. Jonas JB, Spaide RF, Ostrin LA, Logan NS, Flitcroft I, Panda-Jonas S. IMI-  
17 594 Nonpathological human ocular tissue changes with axial myopia. *Invest Ophthalmol Vis*  
18 595 *Sci*. 2023;64(6):5. doi:10.1167/iovs.64.6.5.  
19  
20 596 14. Lee MW, Lee SE, Lim HB, Kim JY. Longitudinal changes in axial length in high myopia:  
21 597 a 4-year prospective study. *Br J Ophthalmol*. 2020;104(5):600-603.  
22 598 doi:10.1136/bjophthalmol-2019-314619.  
23  
24 599 15. El-Nimri NW, Wildsoet CF. Effects of topical latanoprost on intraocular pressure and  
25 600 myopia progression in young guinea pigs. *Invest Ophthalmol Vis Sci*. 2018;59(6):2644-  
26 601 2651. doi:10.1167/iovs.17-22890.  
27  
28 602 16. Yang J, Pan M, Reinach PS, et al. Prostaglandin F2 $\alpha$  receptor modulation affects eye  
29 603 development in guinea pigs. *Basic Clin Pharmacol Toxicol*. 2018;123(3):263-270.  
30 604 doi:10.1111/bcpt.13017.  
31  
32 605 17. Igarashi-Yokoi T, Shinohara K, Fang Y, et al. Prognostic factors for axial length  
33 606 elongation and posterior staphyloma in adults with high myopia: a Japanese  
34 607 observational study. *Am J Ophthalmol*. 2021;225:76-85. doi:10.1016/j.ajo.2020.11.023.  
35  
36 608 18. Chong RS, Li H, Cheong AJY, et al. Mendelian randomization implicates bidirectional  
37 609 association between myopia and primary open-angle glaucoma or intraocular pressure.  
38 610 *Ophthalmology*. 2023;130(4):394-403. doi:10.1016/j.ophtha.2022.11.030.  
39  
40  
41  
42  
43  
44  
45  
46  
47  
48  
49  
50  
51  
52  
53  
54  
55  
56  
57  
58  
59  
60

- 1  
2  
3  
4 611 19. Wang P, Chen S, Liu Y, et al. Lowering intraocular pressure: a potential approach for  
5  
6 612 controlling high myopia progression. *Invest Ophthalmol Vis Sci.* 2021;62(14):17.  
7  
8 613 doi:10.1167/iovs.62.14.17.  
9  
10 614 20. Flitcroft DI, He M, Jonas JB, et al. IMI - Defining and classifying myopia: a proposed  
11  
12 615 set of standards for clinical and epidemiologic studies. *Invest Ophthalmol Vis Sci.*  
13  
14 616 2019;60(3):M20-M30. doi:10.1167/iovs.18-25957.  
15  
16 617 21. Wolf S, Balciuniene VJ, Laganovska G, et al. RADIANCE: a randomized controlled  
17  
18 618 study of ranibizumab in patients with choroidal neovascularization secondary to  
19  
20 619 pathologic myopia. *Ophthalmology.* 2014;121(3):682-92.e2.  
21  
22 620 doi:10.1016/j.ophtha.2013.10.023.  
23  
24 621 22. Comparison of glaucomatous progression between untreated patients with normal-  
25  
26 622 tension glaucoma and patients with therapeutically reduced intraocular pressures.  
27  
28 623 Collaborative Normal-Tension Glaucoma Study Group. *Am J Ophthalmol.*  
29  
30 624 1998;126(4):487-497. doi:10.1016/s0002-9394(98)00223-2.  
31  
32 625 23. Garway-Heath DF, Lascaratos G, Bunce C, et al. The United Kingdom Glaucoma  
33  
34 626 Treatment Study: a multicenter, randomized, placebo-controlled clinical trial: design and  
35  
36 627 methodology. *Ophthalmology.* 2013;120(1):68-76. doi:10.1016/j.ophtha.2012.07.028.  
37  
38 628 24. Garway-Heath DF, Crabb DP, Bunce C, et al. Latanoprost for open-angle glaucoma  
39  
40 629 (UKGTS): a randomised, multicentre, placebo-controlled trial. *Lancet.*  
41  
42 630 2015;385(9975):1295-1304. doi:10.1016/S0140-6736(14)62111-5.  
43  
44 631 25. Leske MC, Heijl A, Hyman L, Bengtsson B. Early Manifest Glaucoma Trial: design and  
45  
46 632 baseline data. *Ophthalmology.* 1999;106(11):2144-2153. doi:10.1016/s0161-  
47  
48 633 6420(99)90497-9.  
49  
50 634 26. Lalezary M, Medeiros FA, Weinreb RN, et al. Baseline optical coherence tomography  
51  
52 635 predicts the development of glaucomatous change in glaucoma suspects. *Am J*  
53  
54 636 *Ophthalmol.* 2006;142(4):576-582. doi:10.1016/j.ajo.2006.05.004.  
55  
56  
57  
58  
59  
60

- 1  
2  
3  
4 637 27. Keltner JL, Johnson CA, Anderson DR, et al. The association between glaucomatous  
5 638 visual fields and optic nerve head features in the Ocular Hypertension Treatment Study.  
6 639 *Ophthalmology*. 2006;113(9):1603-1612. doi:10.1016/j.ophtha.2006.05.061.  
7  
8 640 28. Ohno-Matsui K, Kawasaki R, Jonas JB, et al. International photographic classification  
9 641 and grading system for myopic maculopathy. *Am J Ophthalmol*. 2015;159(5):877-83.e7.  
10 642 doi:10.1016/j.ajo.2015.01.022.  
11  
12 643 29. Li Z, Liu R, Xiao O, et al. Progression of myopic maculopathy in highly myopic Chinese  
13 644 eyes. *Invest Ophthalmol Vis Sci*. 2019;60(4):1096-1104. doi:10.1167/iovs.18-25800.  
14  
15 645 30. Farida FM, Hassan Farahat HG, Salem MS. Refraction errors in school children.  
16 646 *Menoufia Med J*. 2018;31(1):293-298. doi:10.4103/mmj.mmj\_115\_17.  
17  
18  
19  
20  
21  
22  
23  
24 647  
25  
26 648  
27  
28 649  
29  
30 650  
31  
32 651  
33  
34 652  
35  
36 653  
37  
38 654  
39  
40 655  
41  
42 656  
43  
44 657  
45  
46 658  
47  
48 659  
49  
50 660  
51  
52 661  
53  
54 662  
55  
56 663  
57  
58 664  
59  
60

665 **Table 1** Visit schedule

| Periods                         | Screening      | Baseline visit | Follow-up visits |                |                |
|---------------------------------|----------------|----------------|------------------|----------------|----------------|
| Visit                           | V <sub>0</sub> | V <sub>1</sub> | V <sub>2</sub>   | V <sub>3</sub> | V <sub>4</sub> |
| Timepoint                       | Day -14 to -1  | Day 0          | Week 4 (±7d)     | Week 26 (±14d) | Week 52 (±28d) |
| Enrolment                       |                |                |                  |                |                |
| Eligibility screen              | x              |                |                  |                |                |
| Informed consent                | x              |                |                  |                |                |
| History information             | x              |                |                  |                |                |
| Allocation                      |                | x              |                  |                |                |
| Interventions                   |                | x              | x                | x              | x              |
| Assessments                     |                |                |                  |                |                |
| Physical examination            |                | x              |                  |                |                |
| Pregnancy test                  |                | x              |                  |                |                |
| Visual acuity                   |                | x              | x                | x              | x              |
| Refraction                      |                | x              | x                | x              | x              |
| Slit lamp biomicroscopy         |                | x              | x                | x              | x              |
| Intraocular pressure            | x              | x              | x                | x              | x              |
| Axial length                    |                | x              | x                | x              | x              |
| Visual field                    |                | x              | x                | x              | x              |
| Fundus photography              |                | x              | x                | x              | x              |
| Optical coherence tomography    |                | x              | x                | x              | x              |
| Central corneal thickness       |                | x              | x                | x              | x              |
| Adverse events                  | x              | x              | x                | x              | x              |
| Combination drugs               | x              | x              | x                | x              | x              |
| Drug distribution               |                | x              | x                | x              |                |
| Drug recovery and investigation |                |                | x                | x              | x              |

666



1  
2  
3  
4  
5  
6  
7  
8  
9  
10  
11  
12  
13  
14  
15  
16  
17  
18  
19  
20  
21  
22  
23  
24  
25  
26  
27  
28  
29  
30  
31  
32  
33  
34  
35  
36  
37  
38  
39  
40  
41  
42  
43  
44  
45  
46  
47  
48  
49  
50  
51  
52  
53  
54  
55  
56  
57  
58  
59  
60

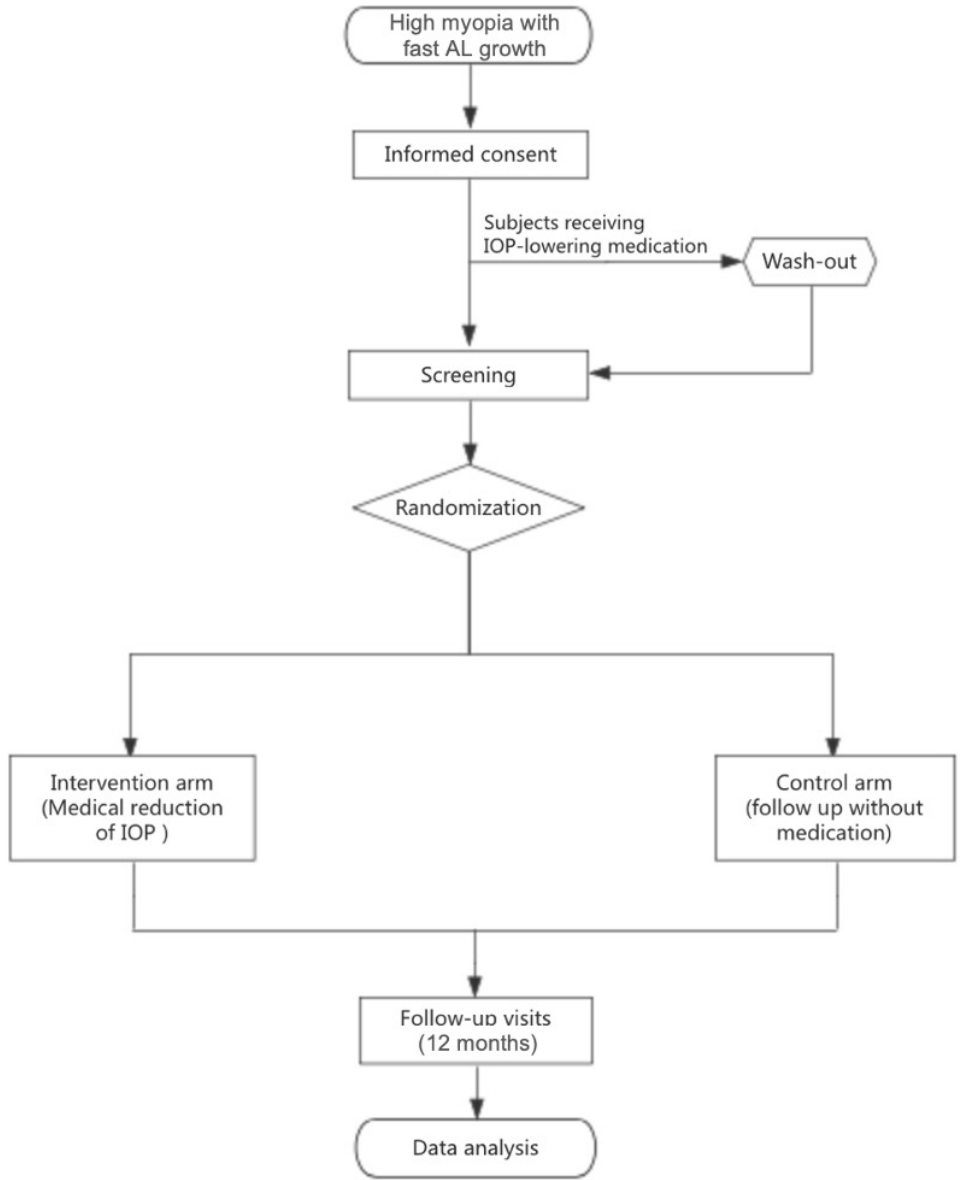

Figure 1

146x174mm (144 x 144 DPI)

# Informed Consent Form - Informed Consent Page

Dear Participant,

Greetings!

You have been diagnosed with "high myopia (HM)," and we cordially invite you to participate in a research study titled "Effect of Intraocular Pressure Reduction on Progressive High Myopia (PHM study): a Randomized Controlled Trial". The purpose of this informed consent form is to provide you with comprehensive research information, enabling you to make an informed decision regarding your participation in this trial. We kindly request you to read this document attentively and direct any inquiries to the responsible researchers.

**Please note that participation in this study is entirely voluntary.** The research protocol has undergone rigorous review and approval by the Ethics Committee of Zhongshan Ophthalmic Center, Sun Yat-sen University, ensuring compliance with ethical standards for conducting clinical research.

## 1. Why is this study being conducted?

HM, particularly pathological myopia, can lead to various severe complications that significantly impact visual function. The axial elongation of the eye in adult patients with HM is a risk factor for the progression of pathological myopia. Therefore, finding ways to delay the continuous axial elongation in adult patients with HM has become a pressing clinical issue. Research indicates that lowering intraocular pressure (IOP) serves as a protective factor against axial elongation in adult patients with high myopia. Animal experiments and our previous small-scale retrospective study have shown that localized IOP reduction can effectively slow down the progression of HM. However, there is currently a lack of robust clinical randomized controlled trials providing substantial evidence in this regard. Hence, it is imperative to conduct this research to establish a strong foundation for determining treatment strategies for patients with progressive high myopia (PHM).

## 2. Who is eligible to participate in this study?

### *Inclusion criteria*

1. Age  $\geq 18$  years and  $\leq 65$  years.
2. Diagnosed with HM: spherical equivalent  $\leq -6.00$  diopters or axial length  $\geq 26.5$  mm.
3. Diagnosed with PHM: axial elongation  $\geq 0.05$ mm in the past 6 months or  $\geq 0.1$ mm in the past 12 months.
4. IOP:  $\geq 10$  mmHg and  $\leq 21$ mmHg on at least 2 visits using Goldmann applanation tonometry with correction for the dependence of the IOP-reading on corneal thickness.
5. Best corrected visual acuity (BCVA)  $\geq 6/12$ , ability to undergo axial length measurement, fundus

1  
2  
3 photography, optical coherence tomography (OCT), and complete visual field examination.  
4  
5

6  
7 *Exclusion criteria*

- 8  
9 1. Patients who have been using IOP-lowering medications within the last year.  
10  
11 2. Allergy to any kind of IOP-lowering eyedrops.  
12  
13 3. Presence of serious fundus pathologies like proliferative diabetic retinopathy, retinal detachment, central  
14 retinal artery occlusion, etc.  
15  
16 4. Presence of chronic, recurrent, or severe ocular inflammatory lesions such as chronic or recurrent uveitis.  
17  
18 5. Significant corneal or iris lesions, severe cataract affecting fundus examination, or patients with only one  
19 eye.  
20  
21 6. Intraocular surgery or laser treatment within the last year, such as cataract surgery.  
22  
23 7. With a history of previous refractive surgery or prior treatment for myopia-related conditions (e.g.,  
24 orthokeratology lens wear, low-intensity red light therapy, or low-concentration atropine treatment).  
25  
26 8. Presence of other serious systemic diseases (e.g., hypertension, heart disease, diabetes, rheumatic immune  
27 system disease) that hinder long-term follow-up and eye treatment.  
28  
29 9. Pregnancy, lactation, or plans to have children during the follow-up period.  
30  
31  
32  
33  
34  
35

36 In this study, only one eye per eligible participant will be included. If both eyes meet the inclusion criteria, the  
37 eye with a higher rate of axial elongation, a worse mean perimetric deviation (MD) value, and a worse BCVA  
38 will be selected.  
39  
40  
41  
42  
43

44 **3. How is the study conducted?**

45 Once you are diagnosed with PHM, we will provide you with the above explanation. If you agree to participate  
46 in this study, we will proceed with the following research procedures after you have signed this informed  
47 consent form. These procedures involve collecting your research data and relevant examination results as  
48 specified in the research protocol. The study process is as follows:  
49  
50  
51  
52

- 53  
54  
55 1) Informed consent and screening for eligibility, with medication washout if necessary.  
56  
57 2) The study physician will select the appropriate eye for research observation based on the requirements of  
58 the research protocol and the patient's individual circumstances.  
59  
60

1  
2  
3 3) Randomization: Participants will be randomly assigned in a 1:1 ratio to either the intraocular pressure-  
4 lowering medication group or the control group (no medication).  
5  
6  
7

8  
9 Participants assigned to the intervention group will receive medical IOP-lowering therapy for a duration of 12  
10 months or until they reach the endpoint. Only the study eye will receive medication in the enrolled participants.  
11 The preferred medication for reducing IOP is Xalacom<sup>®</sup> eye drop (Pfizer Inc., New York, NY, USA), a fixed  
12 latanoprost and timolol combination.  
13  
14  
15

16 The treatment protocol will involve the instillation of a single drop of prostaglandin ophthalmic solution  
17 in the study eye once daily in the evening for medications such as Xalacom. To ensure the standardisation of  
18 medication usage among participants, subjects will be provided with medication logbooks, which will be  
19 collected and recorded by the investigators during the study visits.  
20  
21  
22  
23  
24  
25

#### 26 *Control group*

27  
28 Participants assigned to the control group will be followed up for 12 months or until they reach the endpoint  
29 without medical IOP-lowering therapy.  
30  
31  
32  
33

#### 34 ● Medication Administration:

35  
36 Xalacom: One drop once daily at 22:00 ( $\pm 1$  hour), with lacrimal sac compression for one minute after  
37 administration.  
38  
39

40 ● Medication Follow-up Duration: 1 year (Participants are required to complete three visits within one year,  
41 scheduled at approximately 1 month ( $\pm 1$  week), 6 months ( $\pm 2$  weeks), and 12 months ( $\pm 4$  weeks)  
42 respectively).  
43  
44

45 ● Follow-up Examinations: Visual acuity (uncorrected visual acuity, BCVA), computerized auto-refraction,  
46 Goldmann tonometry, central corneal thickness, axial length, visual field, fundus photography, OCT  
47 examination, quality of life questionnaire, etc.  
48  
49  
50  
51  
52

53 Throughout the study, we will closely monitor any changes in your condition and make necessary adjustments  
54 to the follow-up plan in order to ensure your rights and safety.  
55  
56  
57  
58

#### 59 **4. What is required to participate in the study?**

- 1) Understand the details of this study and voluntarily agree to participate.
- 2) Adhere to the medication regimen (for the IOP-lowering medication group) and follow-up visits as specified in the protocol. Provide accurate information regarding medication response and changes in your condition.

## 5. Impact on daily life by participating in the study

- 1) You may experience inconvenience due to the study visits and examinations. Additionally, some tests may cause discomfort. If you have any concerns or questions about the examinations and procedures during the study, you can consult the research physician.
- 2) During the study period, please consult your research physician before using any new prescription medications to avoid conflicts.
- 3) To ensure your safety and the validity of the study results, you will not be able to participate in any other clinical studies involving medications or medical devices during the study.

## 6. Potential benefits of participating in the study:

Participation in the study will not directly benefit the participants. However, as part of the study, you will receive close follow-up for one year, and the study-related costs, such as the IOP-lowering medication and examinations, will be provided free of charge. This allows for timely detection and treatment of disease progression or other complications. The application of the study results may contribute to improving treatment recommendations for controlling axial elongation in HM.

## 7. Risks of participating in the study

### 1) Risks if enrolled in the IOP-lowering medication group:

- The medication used in this study for lowering IOP is a commonly used glaucoma medication approved by the regulatory authority. Known local and systemic adverse reactions are rare and include eye redness, eyelid pigmentation, eyelash growth, and medication allergies, which are detailed in the drug's package insert.

- Low IOP: During the first week after administering the medication, the participants' IOP will be monitored. If low IOP or other related conditions occur, dose reduction or discontinuation of the medication will be implemented. However, based on previous studies, even when the IOP of normal-tension glaucoma patients is lowered to 30% of baseline, excessively low IOP has not been observed. Therefore, this risk is extremely low.

### 2) Risks if enrolled in the control group:

- The control group in this study does not receive medication. Only a small number of highly myopic participants may have suspected glaucoma, and there is a possibility of worsening of the suspected glaucoma condition during the follow-up. If the examination reveals suspected glaucoma and there is progression of visual field defects during the follow-up, the study will be terminated, and participants will receive further glaucoma-related treatment according to clinical guidelines. The visit intervals in this study are 3-6 months, during which any potential progression would be mild and manageable.

### 3) Risks associated with HM itself:

- This study focuses on individuals with HM. In the natural course of HM, retinal pathologies associated with high myopia such as chorioretinal atrophy, retinal tears, macular holes, retinal detachment, and choroidal neovascularization may occur. Therefore, before enrollment, participants will undergo a detailed dilated fundus examination to exclude individuals at high risk of developing severe complications in the short term. These individuals will be referred to relevant clinical departments for further diagnosis and treatment. If a participant experiences severe retinal complications, such as retinal detachment, during the follow-up period, and it is determined to be unrelated to the medication, the participant will be responsible for the related treatment costs, and the participant will be provided with convenient access to medical care. At the same time, the participant will discontinue the study.

### 4) Risks associated with examinations:

- Risks associated with the examination instruments: All the ophthalmic examinations used in this study have been widely used in clinical practice and do not pose adverse effects on participants. The Goldmann tonometry examination involves contact with the cornea, but with skilled technicians performing precise operations and strict disinfection protocols, the risk is minimized.

- Risks associated with examination medications: The study requires the use of compound tropicamide eye drops for pupil dilation, which is a commonly used mydriatic in clinical practice. Due to pupil dilation, participants may experience blurred vision and mild photosensitivity, which naturally resolves within 4-5 hours. After this examination, participants should avoid engaging in activities such as driving that require visual acuity for about half a day. In rare cases, localized reactions such as allergic conjunctivitis or eyelid inflammation may occur. Therefore, before administering the medication, participants' medical history and allergies will be thoroughly assessed and explained to minimize the occurrence of risks.

## 8. What happens if harm occurs during participation in the study?

Except for unforeseeable circumstances, this study will not cause harm to the participants. The researchers will provide insurance services to the participants involved in the clinical study, as required by Good Clinical Practice (GCP), to protect their rights and interests in participating in the study. Compensation for any harm related to the clinical research will be carried out in accordance with applicable laws and regulations in China.

## 9. Is personal information kept confidential?

**Yes.** Your medical records (medical history, examination results, etc.) will be securely stored at the hospital where you receive treatment. The doctor will record the examination results in your medical records. Researchers, ethics committees, and regulatory authorities will be allowed to access your medical records. Any public reports regarding the results of this study will not disclose your personal identity. We will make every effort to protect the privacy of your personal medical information within the limits permitted by law.

## 10. Is participation in this study mandatory?

Participation in this study is completely voluntary, and it is entirely up to your discretion whether to participate. You have the right to refuse to participate in this study or withdraw from the study at any time without affecting your relationship with the doctor or any other medical or personal interests.

If you decide to withdraw from this study, please inform your research doctor in advance. If you experience any abnormal symptoms during the study, please inform your research doctor or study staff.

For your best interests, the research doctor may suspend your participation in this study at any time if: 1) continuing the study may be detrimental to you, 2) you need treatment that is prohibited by this study, 3) you fail to follow instructions, or 4) the study is terminated.

## 11. What should I do now?

Whether or not to participate in this study is a decision for you (and your family) to make. Before making a decision to participate in the study, please ask your doctor any questions you may have. Thank you for reading the above information. If you decide to participate in this study, please inform your doctor, who will arrange all the necessary matters related to the study. Please keep this information for your reference.

**Contact number for the Ethics Committee of Sun Yat-sen Eye Center, Sun Yat-sen University: 020-66610729.**

## Informed Consent Form - Consent Signature Page

### Consent Statement:

I have read the above information regarding this study and have had the opportunity to discuss it with the doctor and ask questions. All the questions I have raised have been satisfactorily answered.

I am aware of the risks and benefits associated with participating in this study. I understand that participation is voluntary and confirm that I have had sufficient time to consider it. Furthermore, I understand that:

- I can consult the doctor for additional information at any time.
- I can withdraw from this study at any time without discrimination or retaliation, and my medical treatment and rights will not be affected.
- I also understand that if I withdraw from the study, I should inform the doctor about changes in my medical condition and complete the necessary physical and laboratory examinations, as this would be beneficial to the overall study.
- If I require any other medication treatment due to changes in my medical condition, I will either seek the doctor's advice in advance or truthfully inform the doctor afterward.
- I agree that regulatory authorities, ethics committees, or representatives of the sponsor may access my research data.

Finally, I have decided to consent to participate in this study and commit to following the medical advice to the best of my ability.

Signature of Participant (or Guardian): \_\_\_\_\_ Date: \_\_\_\_\_

Contact Phone Number: \_\_\_\_\_

I confirm that I have explained the details of this trial to the patient, including their rights and the potential benefits and risks involved.

Signature of Researcher: \_\_\_\_\_ Date: \_\_\_\_\_

Contact Phone Number: \_\_\_\_\_





STANDARD PROTOCOL ITEMS: RECOMMENDATIONS FOR INTERVENTIONAL TRIALS

SPIRIT 2013 Checklist: Recommended items to address in a clinical trial protocol and related documents\*

| Section/item                      | Item No | Description                                                                                                                                                                                                                                                                              |
|-----------------------------------|---------|------------------------------------------------------------------------------------------------------------------------------------------------------------------------------------------------------------------------------------------------------------------------------------------|
| <b>Administrative information</b> |         |                                                                                                                                                                                                                                                                                          |
| Title                             | 1       | Descriptive title identifying the study design, population, interventions, and, if applicable, trial acronym (P1 L1-3)                                                                                                                                                                   |
| Trial registration                | 2a      | Trial identifier and registry name. If not yet registered, name of intended registry (P3 L85)                                                                                                                                                                                            |
|                                   | 2b      | All items from the World Health Organization Trial Registration Data Set                                                                                                                                                                                                                 |
| Protocol version                  | 3       | Date and version identifier (P20 L554)                                                                                                                                                                                                                                                   |
| Funding                           | 4       | Sources and types of financial, material, and other support (P19 L528-534)                                                                                                                                                                                                               |
| Roles and responsibilities        | 5a      | Names, affiliations, and roles of protocol contributors (P1 L5-21, P20 L536-540)                                                                                                                                                                                                         |
|                                   | 5b      | Name and contact information for the trial sponsor                                                                                                                                                                                                                                       |
|                                   | 5c      | Role of study sponsor and funders, if any, in study design; collection, management, analysis, and interpretation of data; writing of the report; and the decision to submit the report for publication, including whether they will have ultimate authority over any of these activities |
|                                   | 5d      | Composition, roles, and responsibilities of the coordinating centre, steering committee, endpoint adjudication committee, data management team, and other individuals or groups overseeing the trial, if applicable (see Item 21a for data monitoring committee)                         |
| <b>Introduction</b>               |         |                                                                                                                                                                                                                                                                                          |
| Background and rationale          | 6a      | Description of research question and justification for undertaking the trial, including summary of relevant studies (published and unpublished) examining benefits and harms for each intervention (P3 L60-65)                                                                           |
|                                   | 6b      | Explanation for choice of comparators                                                                                                                                                                                                                                                    |
| Objectives                        | 7       | Specific objectives or hypotheses (P3 L66-67)                                                                                                                                                                                                                                            |

1  
2  
3  
4  
5  
6  
7  
8  
9  
10  
11  
12  
13  
14  
15  
16  
17  
18  
19  
20  
21  
22  
23  
24  
25  
26  
27  
28  
29  
30  
31  
32  
33  
34  
35  
36  
37  
38  
39  
40  
41  
42  
43  
44  
45  
46  
47  
48  
49  
50  
51  
52  
53  
54  
55  
56  
57  
58  
59  
60

|              |   |                                                                                                                                                                                                                                      |
|--------------|---|--------------------------------------------------------------------------------------------------------------------------------------------------------------------------------------------------------------------------------------|
| Trial design | 8 | Description of trial design including type of trial (eg, parallel group, crossover, factorial, single group), allocation ratio, and framework (eg, superiority, equivalence, noninferiority, exploratory) ( <a href="#">P3 L68</a> ) |
|--------------|---|--------------------------------------------------------------------------------------------------------------------------------------------------------------------------------------------------------------------------------------|

### **Methods: Participants, interventions, and outcomes**

|               |   |                                                                                                                                                                                                                  |
|---------------|---|------------------------------------------------------------------------------------------------------------------------------------------------------------------------------------------------------------------|
| Study setting | 9 | Description of study settings (eg, community clinic, academic hospital) and list of countries where data will be collected. Reference to where list of study sites can be obtained ( <a href="#">P3 L69-70</a> ) |
|---------------|---|------------------------------------------------------------------------------------------------------------------------------------------------------------------------------------------------------------------|

|                      |    |                                                                                                                                                                                                                            |
|----------------------|----|----------------------------------------------------------------------------------------------------------------------------------------------------------------------------------------------------------------------------|
| Eligibility criteria | 10 | Inclusion and exclusion criteria for participants. If applicable, eligibility criteria for study centres and individuals who will perform the interventions (eg, surgeons, psychotherapists) ( <a href="#">P3 L69-70</a> ) |
|----------------------|----|----------------------------------------------------------------------------------------------------------------------------------------------------------------------------------------------------------------------------|

|               |     |                                                                                                                                                          |
|---------------|-----|----------------------------------------------------------------------------------------------------------------------------------------------------------|
| Interventions | 11a | Interventions for each group with sufficient detail to allow replication, including how and when they will be administered ( <a href="#">P3 L70-72</a> ) |
|---------------|-----|----------------------------------------------------------------------------------------------------------------------------------------------------------|

|  |     |                                                                                                                                                                                                |
|--|-----|------------------------------------------------------------------------------------------------------------------------------------------------------------------------------------------------|
|  | 11b | Criteria for discontinuing or modifying allocated interventions for a given trial participant (eg, drug dose change in response to harms, participant request, or improving/worsening disease) |
|--|-----|------------------------------------------------------------------------------------------------------------------------------------------------------------------------------------------------|

|  |     |                                                                                                                                                   |
|--|-----|---------------------------------------------------------------------------------------------------------------------------------------------------|
|  | 11c | Strategies to improve adherence to intervention protocols, and any procedures for monitoring adherence (eg, drug tablet return, laboratory tests) |
|--|-----|---------------------------------------------------------------------------------------------------------------------------------------------------|

|  |     |                                                                                               |
|--|-----|-----------------------------------------------------------------------------------------------|
|  | 11d | Relevant concomitant care and interventions that are permitted or prohibited during the trial |
|--|-----|-----------------------------------------------------------------------------------------------|

|          |    |                                                                                                                                                                                                                                                                                                                                                                                                              |
|----------|----|--------------------------------------------------------------------------------------------------------------------------------------------------------------------------------------------------------------------------------------------------------------------------------------------------------------------------------------------------------------------------------------------------------------|
| Outcomes | 12 | Primary, secondary, and other outcomes, including the specific measurement variable (eg, systolic blood pressure), analysis metric (eg, change from baseline, final value, time to event), method of aggregation (eg, median, proportion), and time point for each outcome. Explanation of the clinical relevance of chosen efficacy and harm outcomes is strongly recommended ( <a href="#">P3 L73-77</a> ) |
|----------|----|--------------------------------------------------------------------------------------------------------------------------------------------------------------------------------------------------------------------------------------------------------------------------------------------------------------------------------------------------------------------------------------------------------------|

|                      |    |                                                                                                                                                                                                          |
|----------------------|----|----------------------------------------------------------------------------------------------------------------------------------------------------------------------------------------------------------|
| Participant timeline | 13 | Time schedule of enrolment, interventions (including any run-ins and washouts), assessments, and visits for participants. A schematic diagram is highly recommended (see Figure) ( <a href="#">P25</a> ) |
|----------------------|----|----------------------------------------------------------------------------------------------------------------------------------------------------------------------------------------------------------|

|             |    |                                                                                                                                                                                                                  |
|-------------|----|------------------------------------------------------------------------------------------------------------------------------------------------------------------------------------------------------------------|
| Sample size | 14 | Estimated number of participants needed to achieve study objectives and how it was determined, including clinical and statistical assumptions supporting any sample size calculations ( <a href="#">P3 L69</a> ) |
|-------------|----|------------------------------------------------------------------------------------------------------------------------------------------------------------------------------------------------------------------|

|             |    |                                                                                                                |
|-------------|----|----------------------------------------------------------------------------------------------------------------|
| Recruitment | 15 | Strategies for achieving adequate participant enrolment to reach target sample size ( <a href="#">P3 L69</a> ) |
|-------------|----|----------------------------------------------------------------------------------------------------------------|

### **Methods: Assignment of interventions (for controlled trials)**

Allocation:

|    |                |     |                                                                         |
|----|----------------|-----|-------------------------------------------------------------------------|
| 1  |                |     |                                                                         |
| 2  | Sequence       | 16a | Method of generating the allocation sequence (eg, computer-             |
| 3  | generation     |     | generated random numbers), and list of any factors for stratification.  |
| 4  |                |     | To reduce predictability of a random sequence, details of any planned   |
| 5  |                |     | restriction (eg, blocking) should be provided in a separate document    |
| 6  |                |     | that is unavailable to those who enrol participants or assign           |
| 7  |                |     | interventions ( <a href="#">P8 L198-209</a> )                           |
| 8  |                |     |                                                                         |
| 9  |                |     |                                                                         |
| 10 | Allocation     | 16b | Mechanism of implementing the allocation sequence (eg, central          |
| 11 | concealment    |     | telephone; sequentially numbered, opaque, sealed envelopes),            |
| 12 | mechanism      |     | describing any steps to conceal the sequence until interventions are    |
| 13 |                |     | assigned                                                                |
| 14 |                |     |                                                                         |
| 15 | Implementation | 16c | Who will generate the allocation sequence, who will enrol participants, |
| 16 |                |     | and who will assign participants to interventions                       |
| 17 |                |     |                                                                         |
| 18 |                |     |                                                                         |
| 19 | Blinding       | 17a | Who will be blinded after assignment to interventions (eg, trial        |
| 20 | (masking)      |     | participants, care providers, outcome assessors, data analysts), and    |
| 21 |                |     | how ( <a href="#">P8 L198-209</a> )                                     |
| 22 |                |     |                                                                         |
| 23 |                | 17b | If blinded, circumstances under which unblinding is permissible, and    |
| 24 |                |     | procedure for revealing a participant's allocated intervention during   |
| 25 |                |     | the trial                                                               |
| 26 |                |     |                                                                         |
| 27 |                |     |                                                                         |

### Methods: Data collection, management, and analysis

|    |                 |     |                                                                                       |
|----|-----------------|-----|---------------------------------------------------------------------------------------|
| 28 |                 |     |                                                                                       |
| 29 |                 |     |                                                                                       |
| 30 | Data collection | 18a | Plans for assessment and collection of outcome, baseline, and other                   |
| 31 | methods         |     | trial data, including any related processes to promote data quality (eg,              |
| 32 |                 |     | duplicate measurements, training of assessors) and a description of                   |
| 33 |                 |     | study instruments (eg, questionnaires, laboratory tests) along with                   |
| 34 |                 |     | their reliability and validity, if known. Reference to where data                     |
| 35 |                 |     | collection forms can be found, if not in the protocol ( <a href="#">P10-P13 L271-</a> |
| 36 |                 |     | <a href="#">346</a> )                                                                 |
| 37 |                 |     |                                                                                       |
| 38 |                 |     |                                                                                       |
| 39 |                 | 18b | Plans to promote participant retention and complete follow-up,                        |
| 40 |                 |     | including list of any outcome data to be collected for participants who               |
| 41 |                 |     | discontinue or deviate from intervention protocols                                    |
| 42 |                 |     |                                                                                       |
| 43 |                 |     |                                                                                       |
| 44 | Data            | 19  | Plans for data entry, coding, security, and storage, including any                    |
| 45 | management      |     | related processes to promote data quality (eg, double data entry;                     |
| 46 |                 |     | range checks for data values). Reference to where details of data                     |
| 47 |                 |     | management procedures can be found, if not in the protocol ( <a href="#">P15</a>      |
| 48 |                 |     | <a href="#">L408-240</a> )                                                            |
| 49 |                 |     |                                                                                       |
| 50 |                 |     |                                                                                       |
| 51 | Statistical     | 20a | Statistical methods for analysing primary and secondary outcomes.                     |
| 52 | methods         |     | Reference to where other details of the statistical analysis plan can be              |
| 53 |                 |     | found, if not in the protocol( <a href="#">P14 L368-396</a> )                         |
| 54 |                 |     |                                                                                       |
| 55 |                 | 20b | Methods for any additional analyses (eg, subgroup and adjusted                        |
| 56 |                 |     | analyses)                                                                             |
| 57 |                 |     |                                                                                       |
| 58 |                 |     |                                                                                       |
| 59 |                 |     |                                                                                       |
| 60 |                 |     |                                                                                       |

- 1  
2  
3  
4  
5  
6  
7
- 20c Definition of analysis population relating to protocol non-adherence (eg, as randomised analysis), and any statistical methods to handle missing data (eg, multiple imputation)

### 8 **Methods: Monitoring**

- 9  
10  
11  
12  
13  
14  
15  
16  
17  
18  
19  
20  
21  
22  
23  
24  
25  
26  
27  
28  
29
- Data monitoring 21a Composition of data monitoring committee (DMC); summary of its role and reporting structure; statement of whether it is independent from the sponsor and competing interests; and reference to where further details about its charter can be found, if not in the protocol. Alternatively, an explanation of why a DMC is not needed ([P15 L398-406](#))
- 21b Description of any interim analyses and stopping guidelines, including who will have access to these interim results and make the final decision to terminate the trial
- Harms 22 Plans for collecting, assessing, reporting, and managing solicited and spontaneously reported adverse events and other unintended effects of trial interventions or trial conduct ([P17 L464-474](#))
- Auditing 23 Frequency and procedures for auditing trial conduct, if any, and whether the process will be independent from investigators and the sponsor([P15 L398-406](#))

### 30 **Ethics and dissemination**

- 31  
32  
33  
34  
35  
36  
37  
38  
39  
40  
41  
42  
43  
44  
45  
46  
47  
48  
49  
50  
51  
52  
53  
54  
55  
56  
57  
58  
59  
60
- Research ethics approval 24 Plans for seeking research ethics committee/institutional review board (REC/IRB) approval([P2 L45-47](#))
- Protocol amendments 25 Plans for communicating important protocol modifications (eg, changes to eligibility criteria, outcomes, analyses) to relevant parties (eg, investigators, REC/IRBs, trial participants, trial registries, journals, regulators)
- Consent or assent 26a Who will obtain informed consent or assent from potential trial participants or authorised surrogates, and how (see Item 32)
- 26b Additional consent provisions for collection and use of participant data and biological specimens in ancillary studies, if applicable
- Confidentiality 27 How personal information about potential and enrolled participants will be collected, shared, and maintained in order to protect confidentiality before, during, and after the trial
- Declaration of interests 28 Financial and other competing interests for principal investigators for the overall trial and each study site
- Access to data 29 Statement of who will have access to the final trial dataset, and disclosure of contractual agreements that limit such access for investigators

|    |                   |     |                                                                              |
|----|-------------------|-----|------------------------------------------------------------------------------|
| 1  |                   |     |                                                                              |
| 2  | Ancillary and     | 30  | Provisions, if any, for ancillary and post-trial care, and for               |
| 3  | post-trial care   |     | compensation to those who suffer harm from trial participation               |
| 4  |                   |     |                                                                              |
| 5  | Dissemination     | 31a | Plans for investigators and sponsor to communicate trial results to          |
| 6  | policy            |     | participants, healthcare professionals, the public, and other relevant       |
| 7  |                   |     | groups (eg, via publication, reporting in results databases, or other        |
| 8  |                   |     | data sharing arrangements), including any publication restrictions(P3        |
| 9  |                   |     | <a href="#">L83-86</a> )                                                     |
| 10 |                   |     |                                                                              |
| 11 |                   | 31b | Authorship eligibility guidelines and any intended use of professional       |
| 12 |                   |     | writers                                                                      |
| 13 |                   |     |                                                                              |
| 14 |                   | 31c | Plans, if any, for granting public access to the full protocol, participant- |
| 15 |                   |     | level dataset, and statistical code                                          |
| 16 |                   |     |                                                                              |
| 17 |                   |     |                                                                              |
| 18 |                   |     |                                                                              |
| 19 | <b>Appendices</b> |     |                                                                              |
| 20 |                   |     |                                                                              |
| 21 | Informed consent  | 32  | Model consent form and other related documentation given to                  |
| 22 | materials         |     | participants and authorised surrogates(P8 <a href="#">L200</a> )             |
| 23 |                   |     |                                                                              |
| 24 | Biological        | 33  | Plans for collection, laboratory evaluation, and storage of biological       |
| 25 | specimens         |     | specimens for genetic or molecular analysis in the current trial and for     |
| 26 |                   |     | future use in ancillary studies, if applicable                               |
| 27 |                   |     |                                                                              |

---

\*It is strongly recommended that this checklist be read in conjunction with the SPIRIT 2013 Explanation & Elaboration for important clarification on the items. Amendments to the protocol should be tracked and dated. The SPIRIT checklist is copyrighted by the SPIRIT Group under the Creative Commons "[Attribution-NonCommercial-NoDerivs 3.0 Unported](#)" license.
